# Supplementary material
Source: MDPI journal article supplement (https://www.mdpi.com/2076-3263/7/1/11)

## Supplemental File – S2

Selected hydrographs for municipal and observation wells in the Northeast  
Groundwater Management Area, Wisconsin, USA

### Communities in Northern Cone Include:

Ashwaubenon (Village)

Bellevue (Village)

De Pere (City)

Green Bay (City)

Hobart (Village)

Howard (Village)

Scott (Town)

### Communities in Southern Cone Include:

Darboy (Unincorporated)

Kimberly (Village)

Kaukauna (City)

Little Chute (Village)

Holland (Town)

### Wells in Other Parts of the GMA:

Forest Junction (Unincorporated)

Pulaski (Village)

Wrightstown (Village)

# Hydrographs for USGS Monitored Wells in Northern Cone

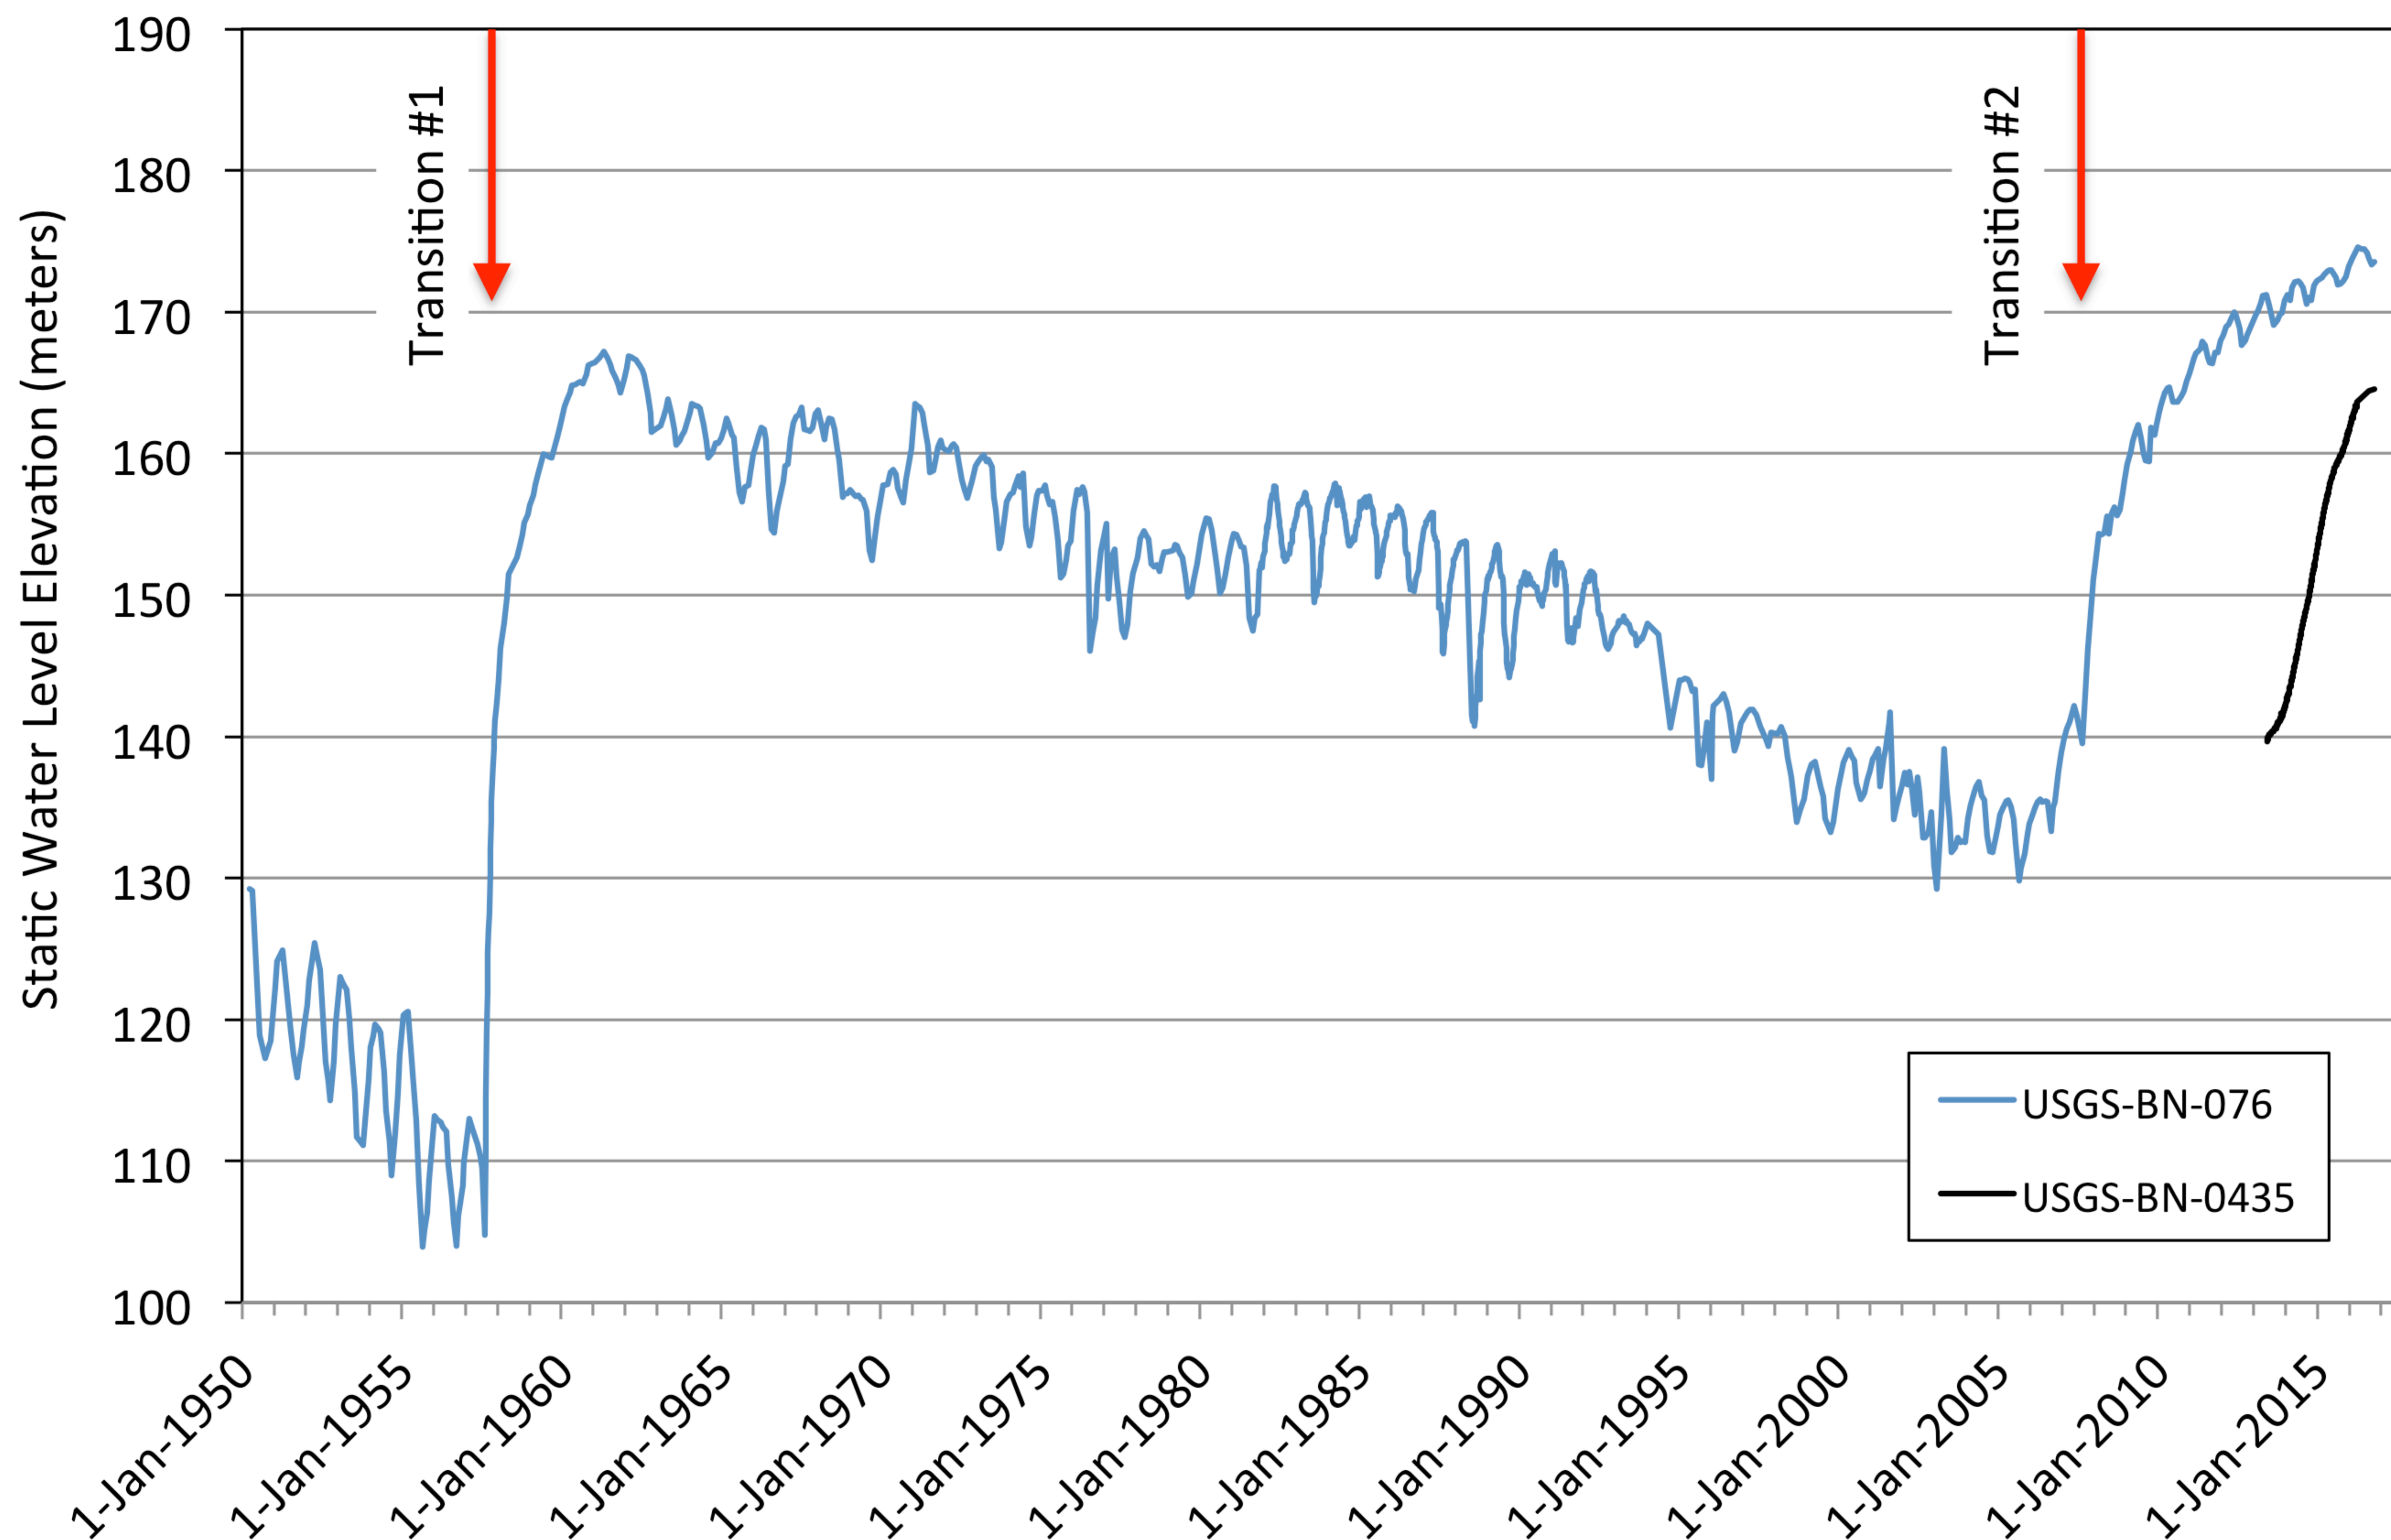

# Hydrographs for Selected Wells in the City of Green Bay

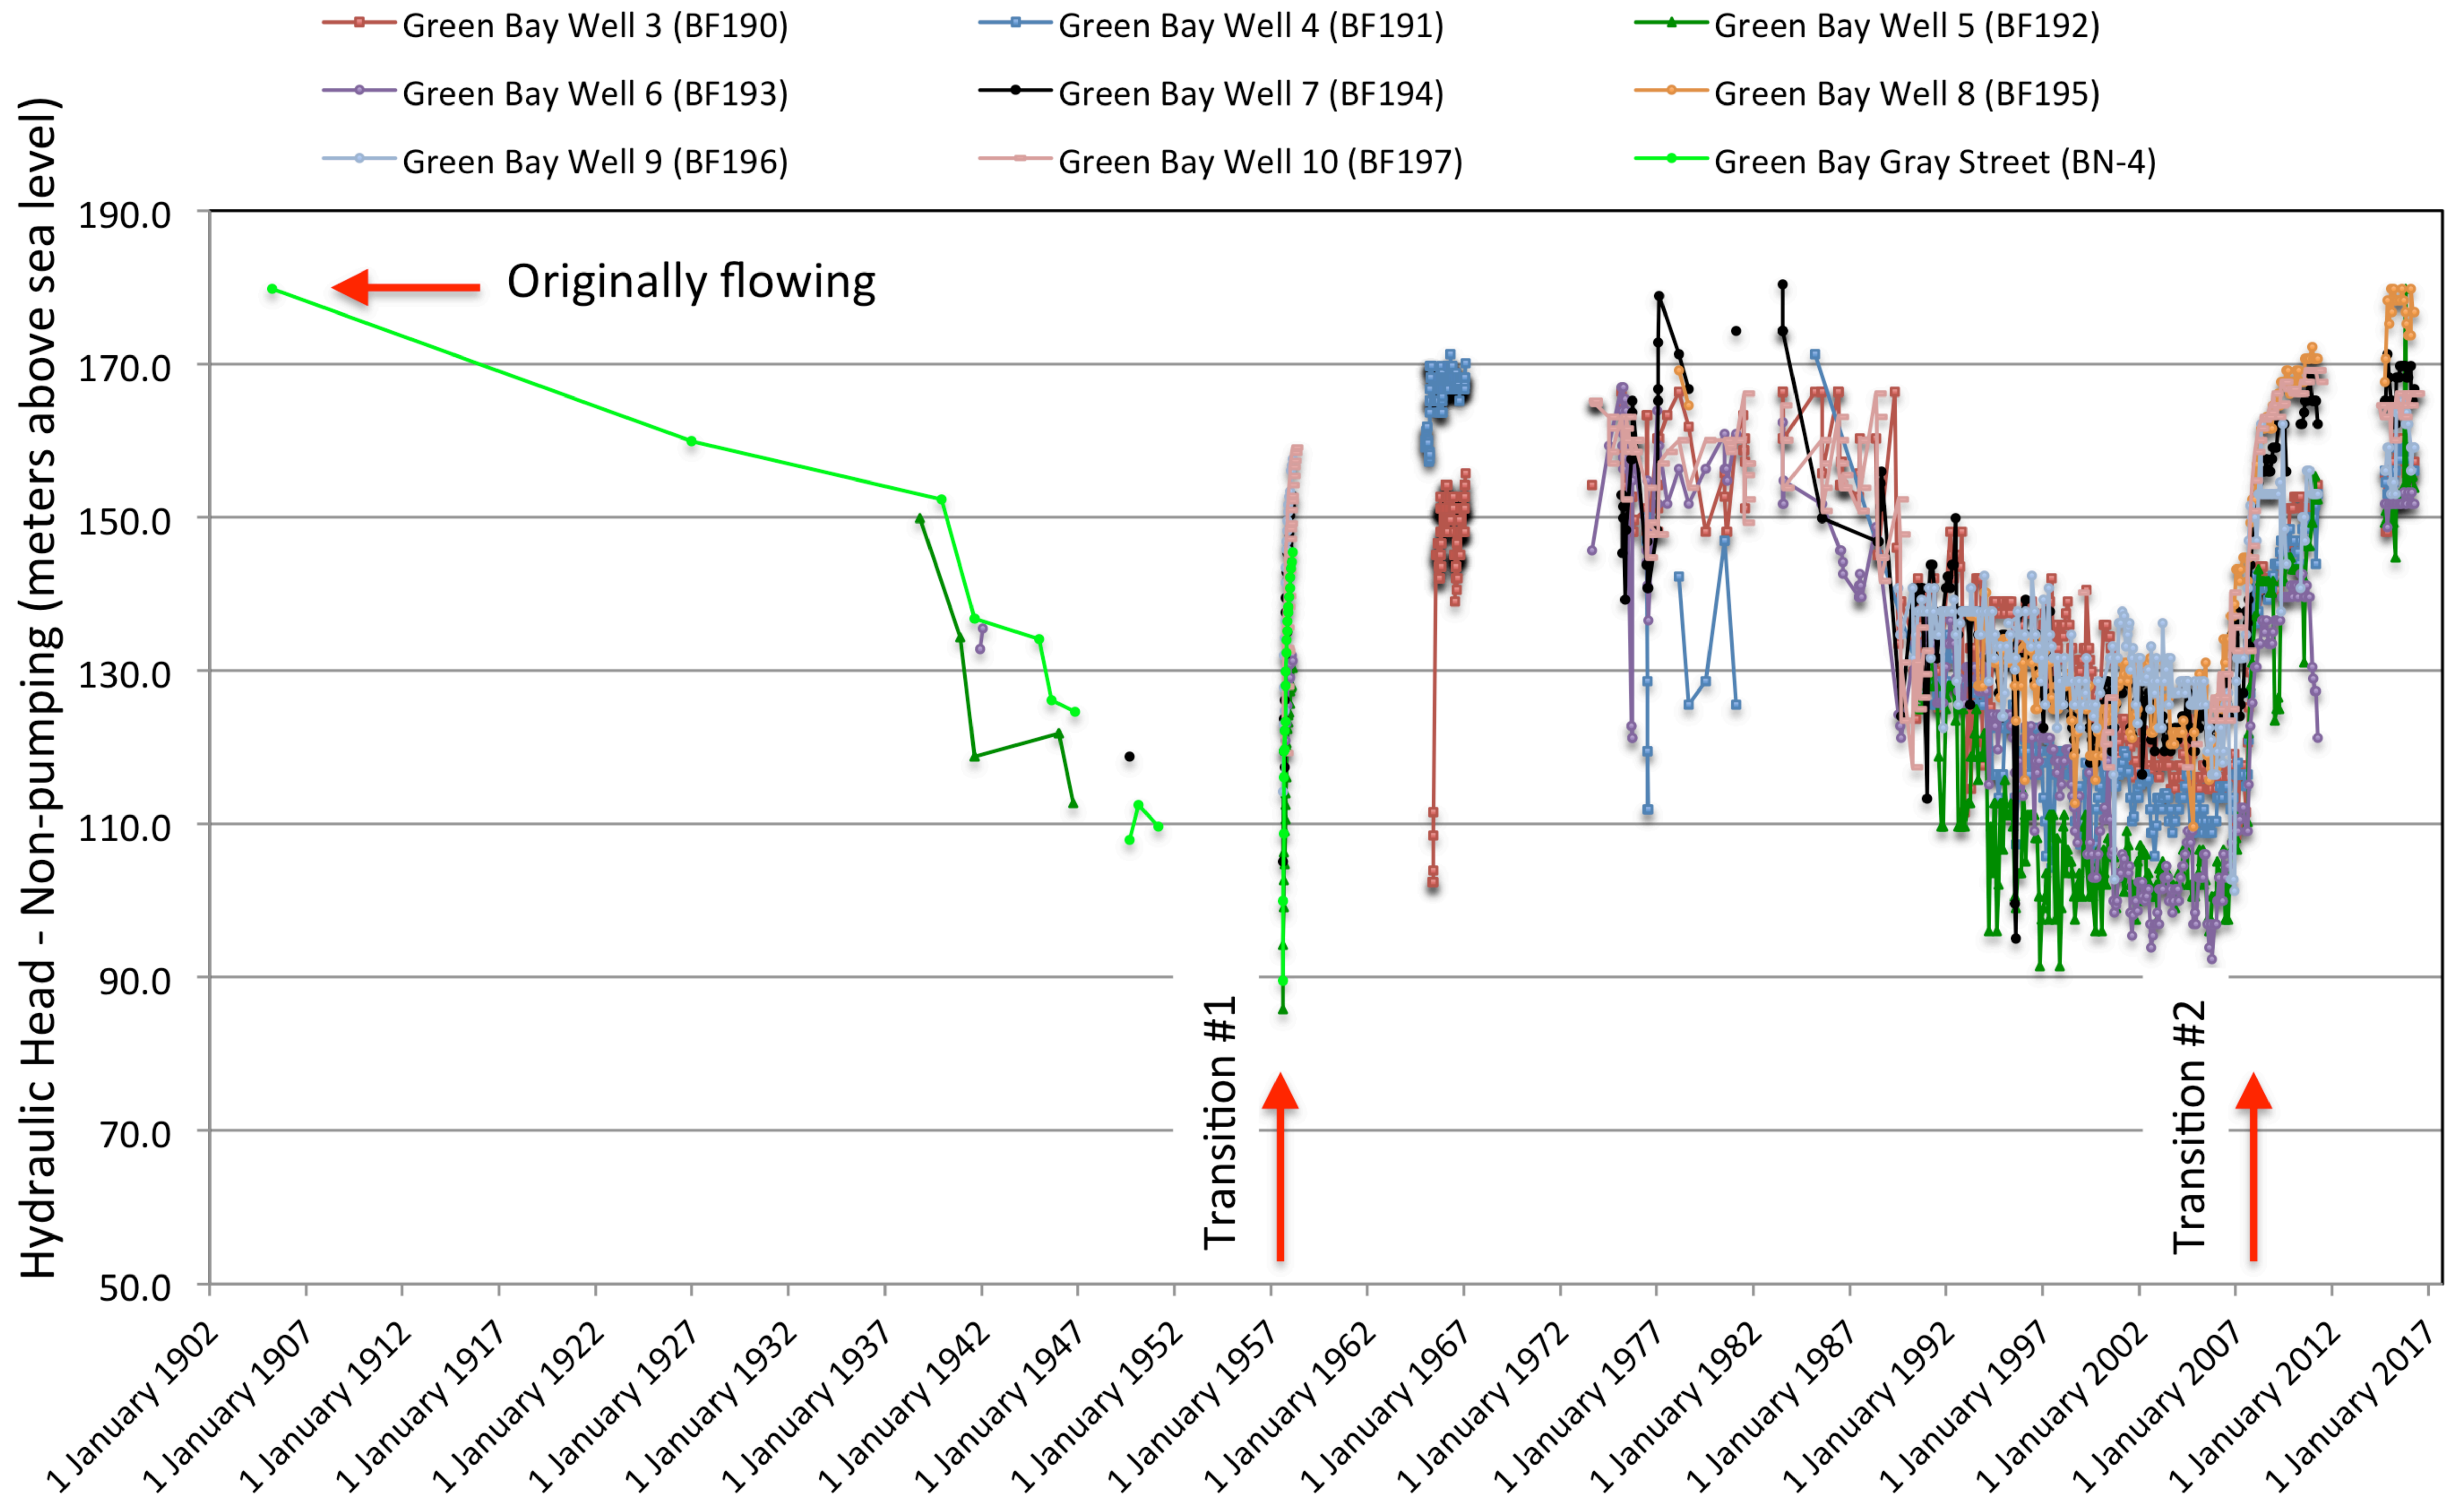

# Hydrographs for Selected Wells in the City of Green Bay

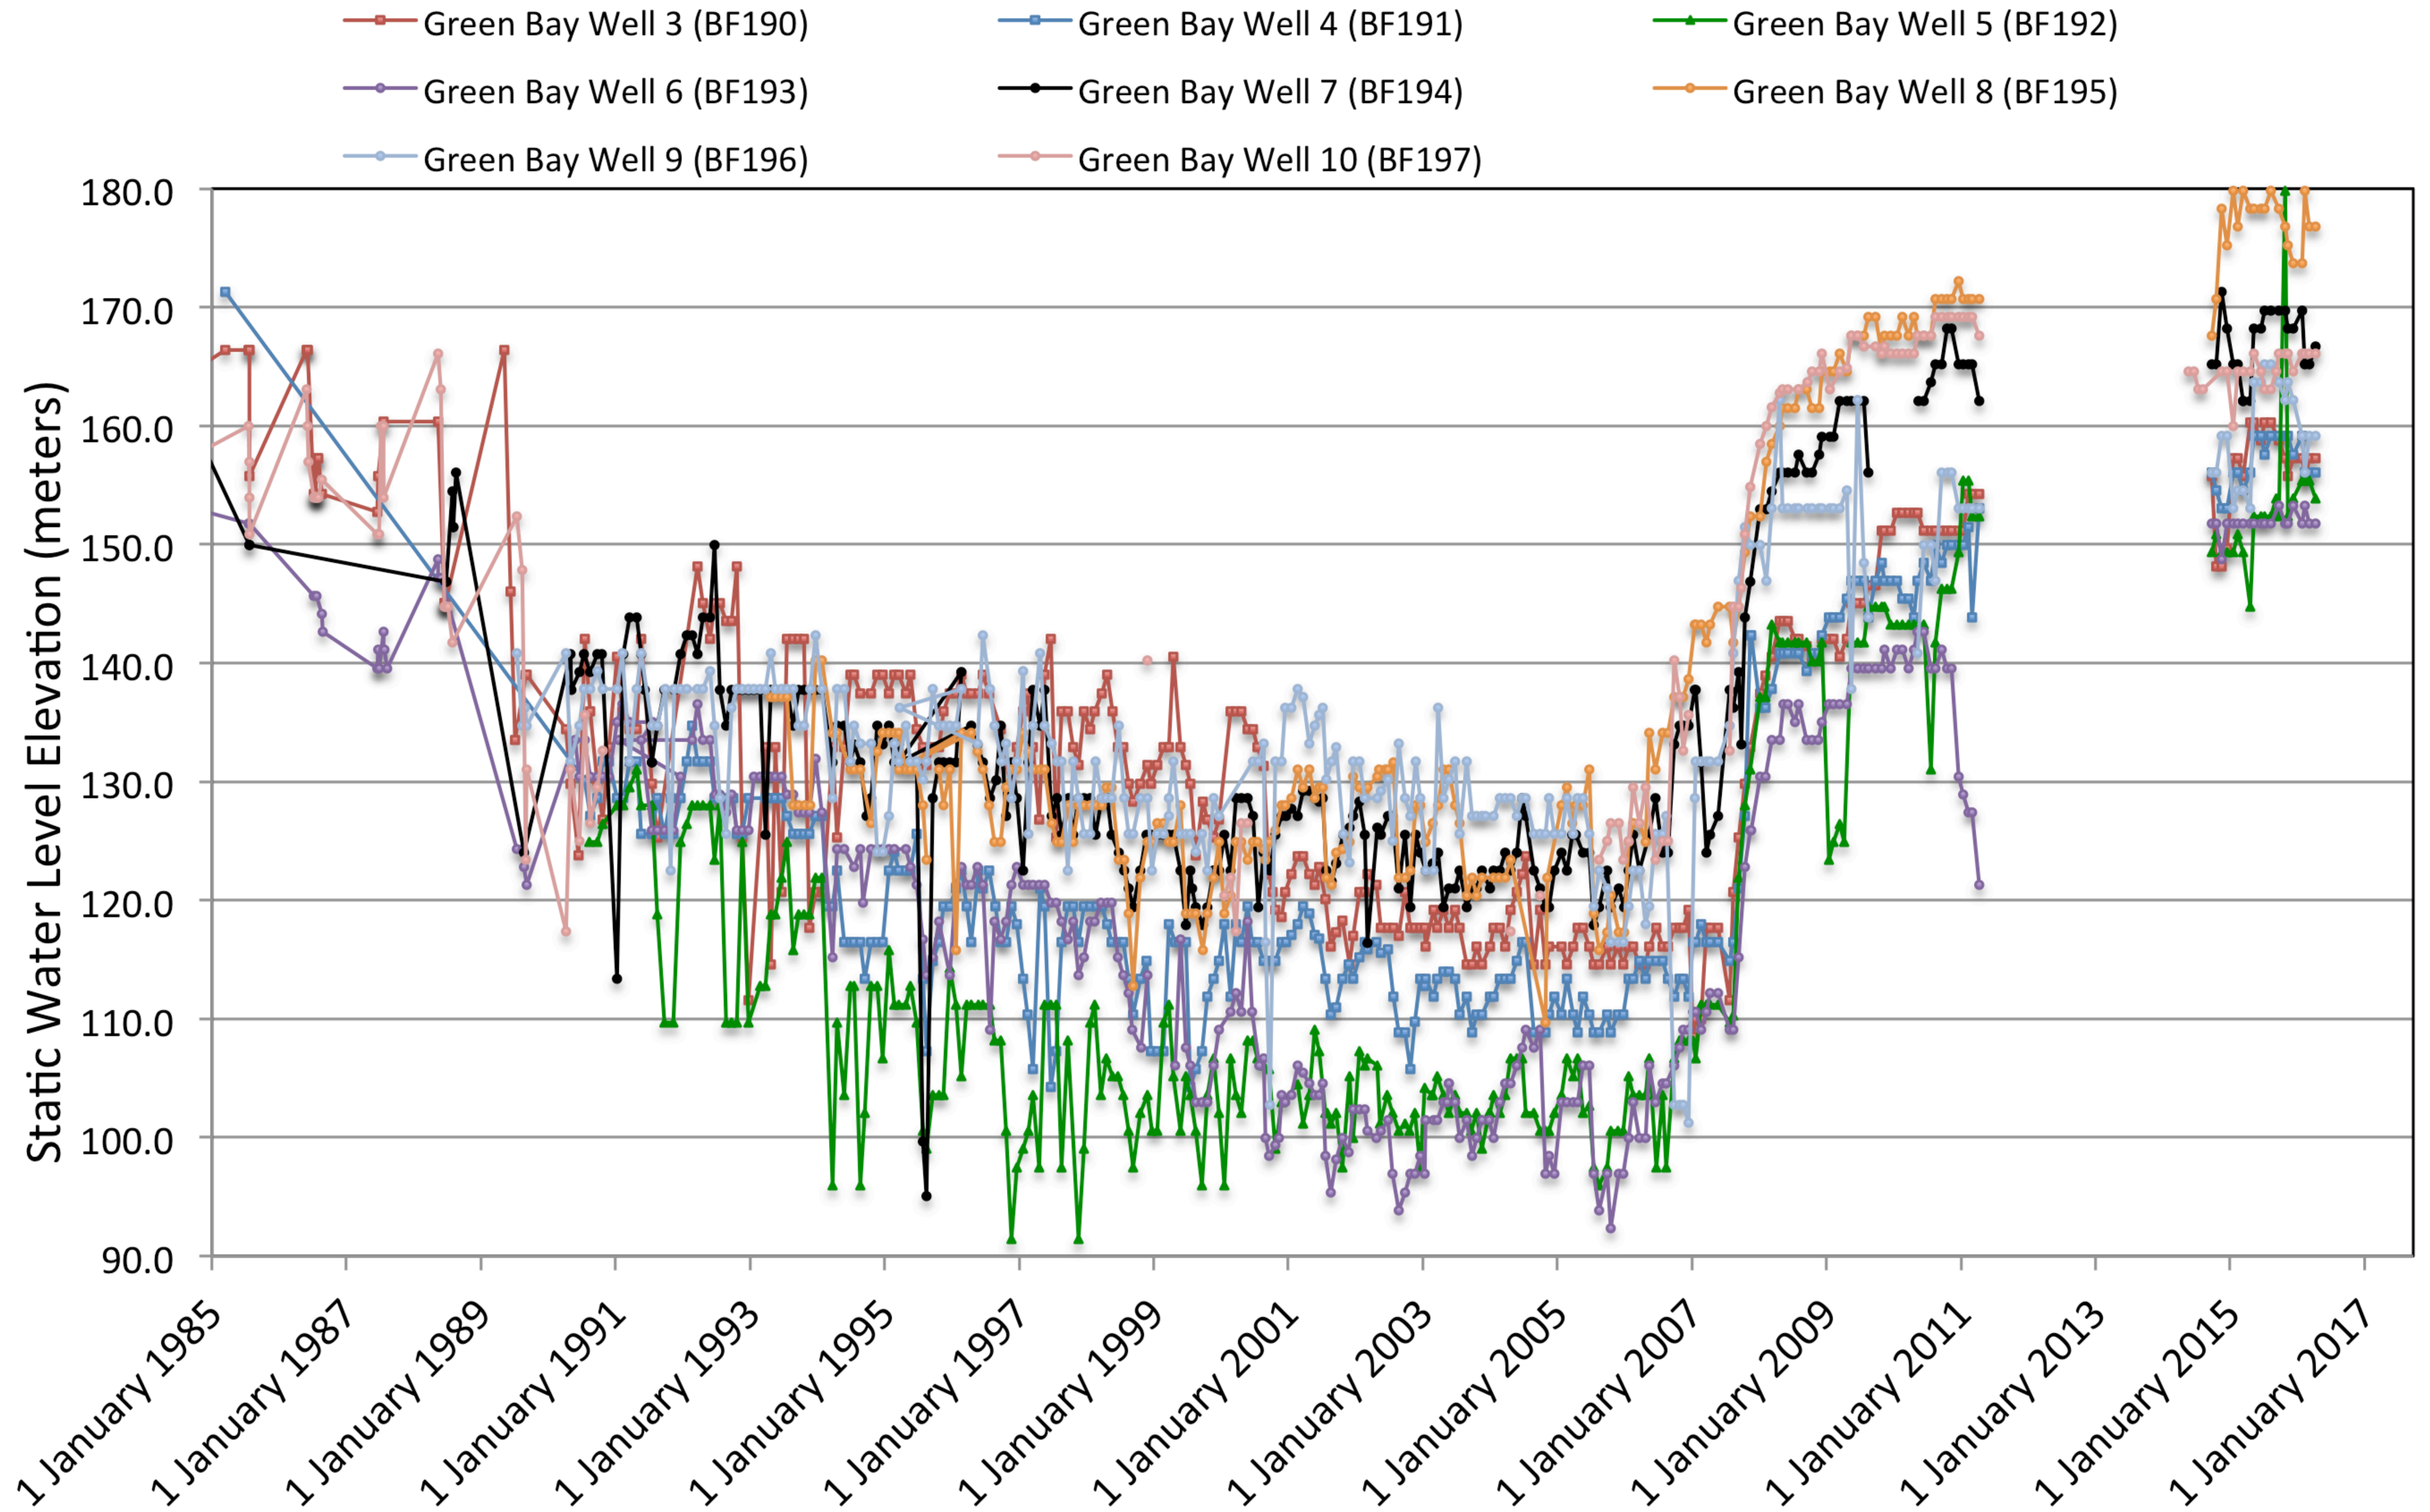

## Village of Ashwaubenon Hydrographs (Northern Cone)

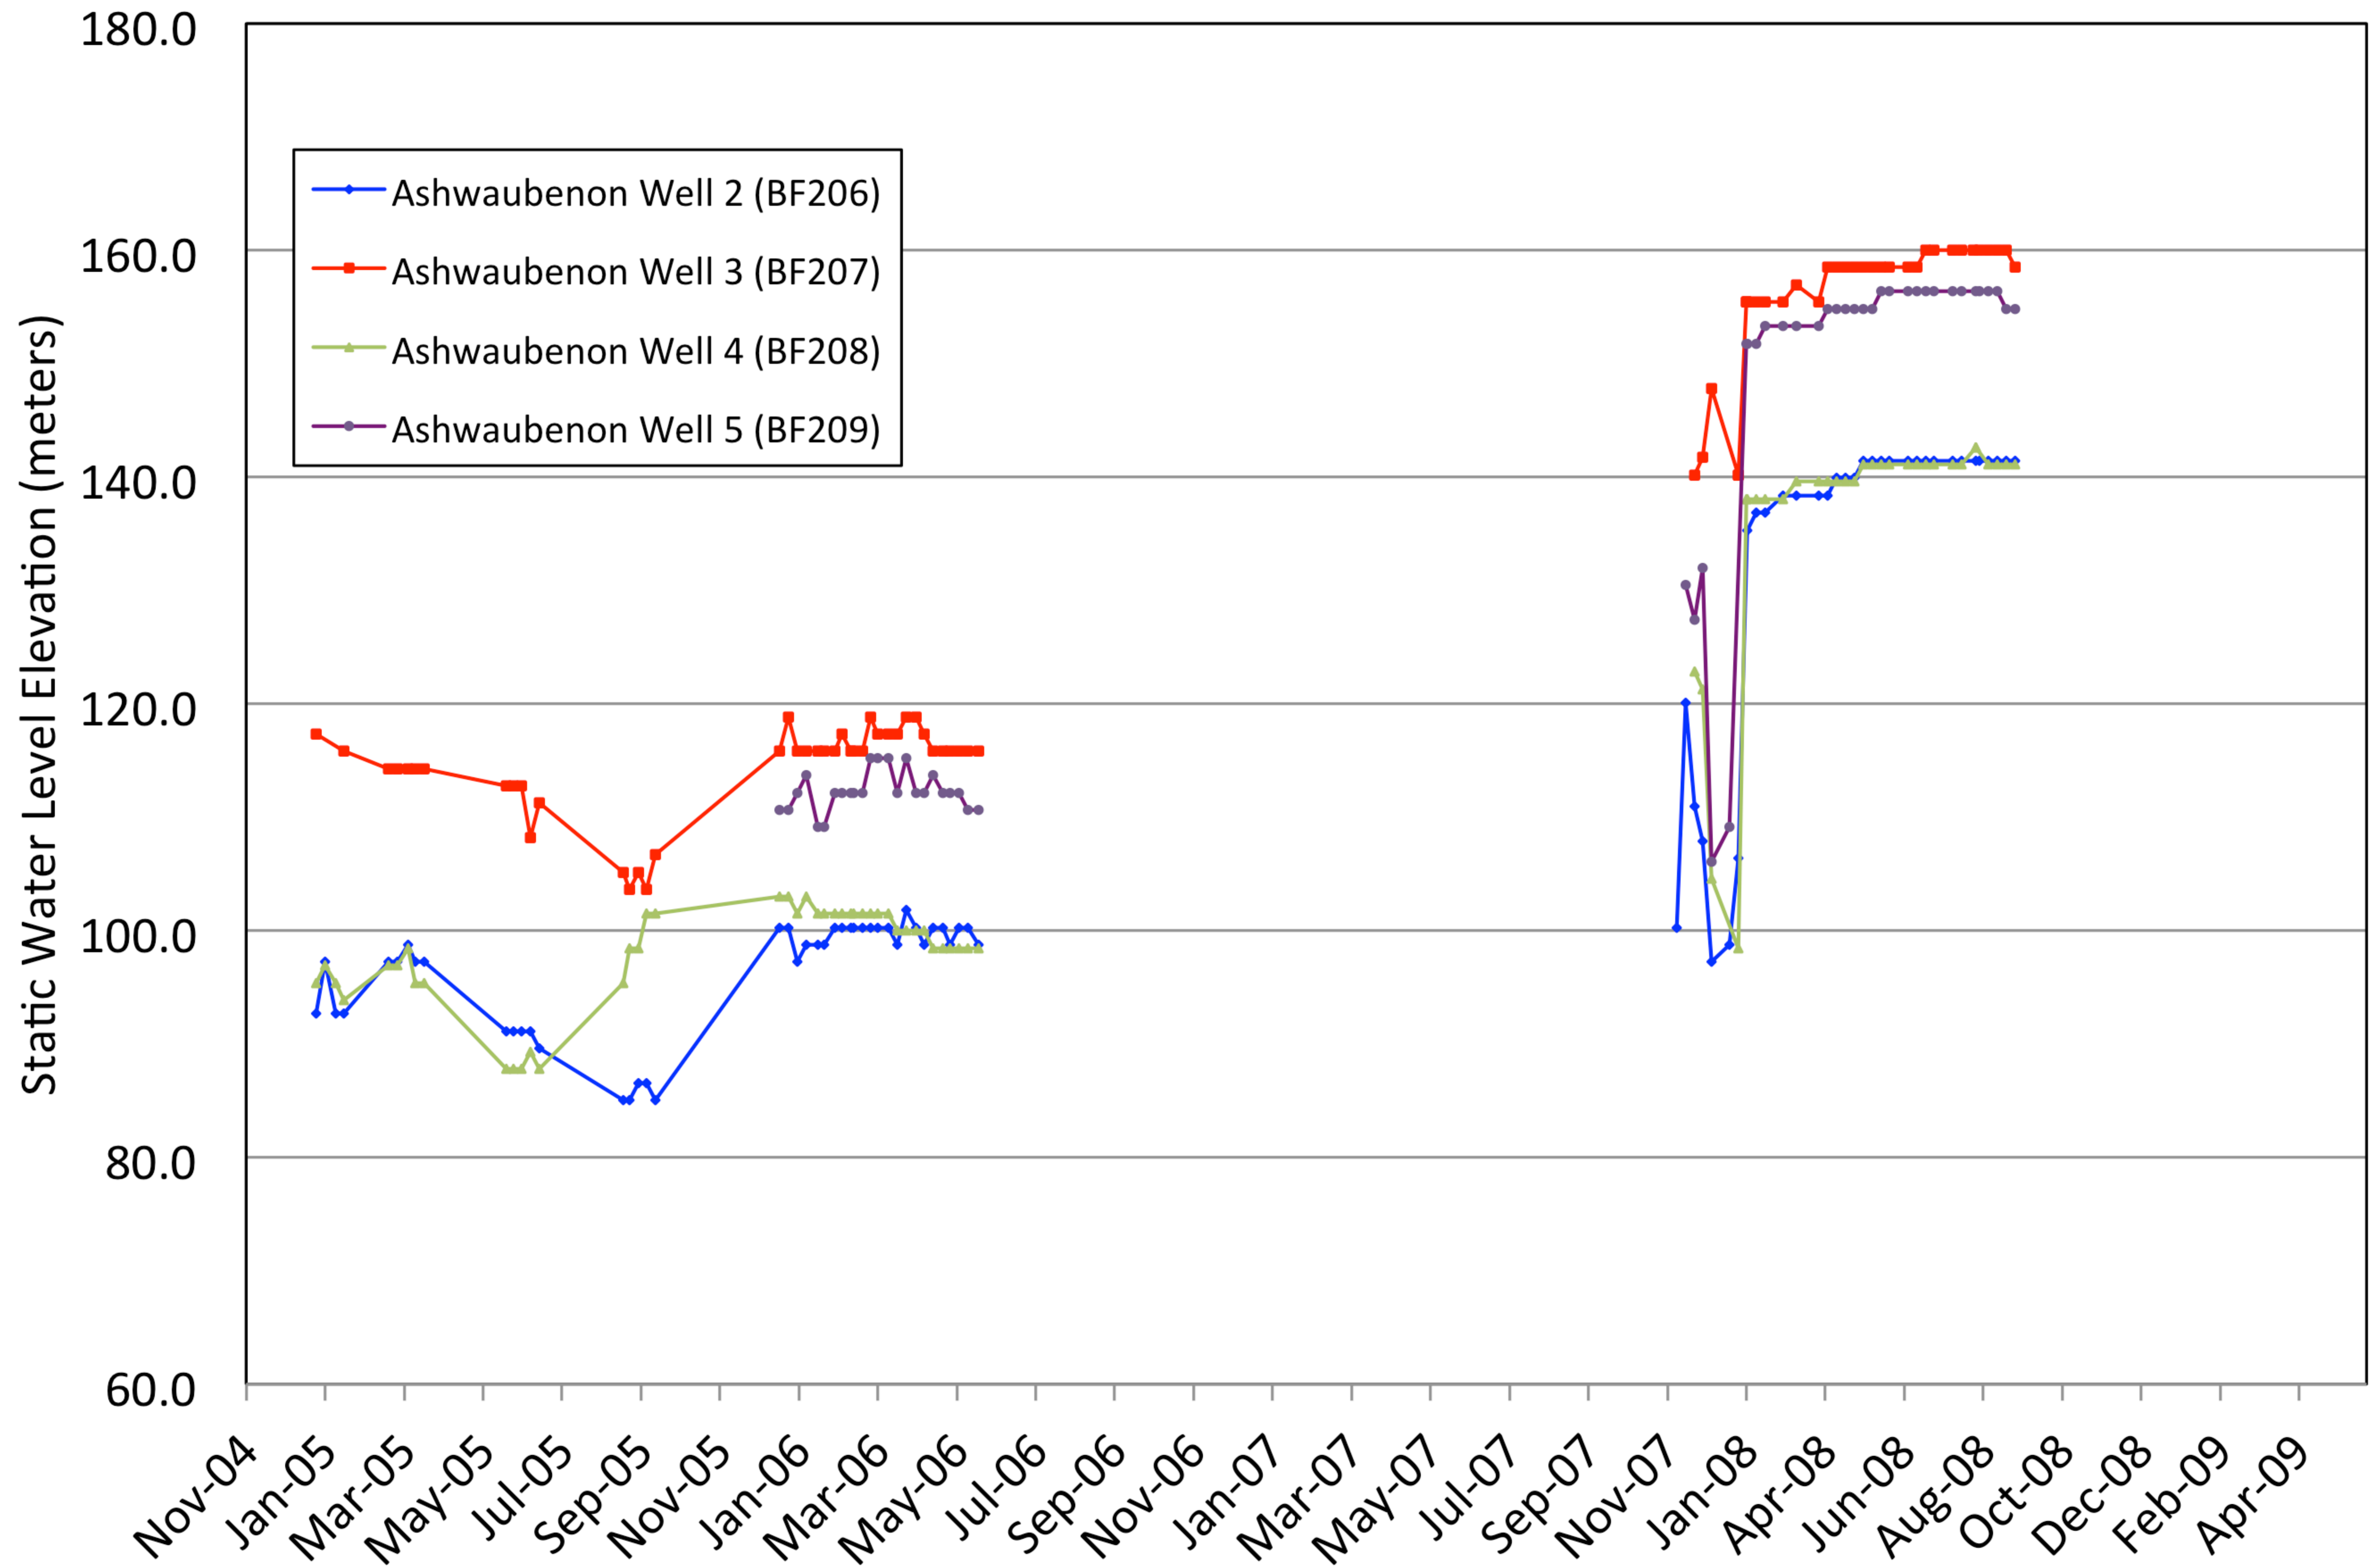

# Village of Bellevue Hydrographs (Northern Cone, east side)

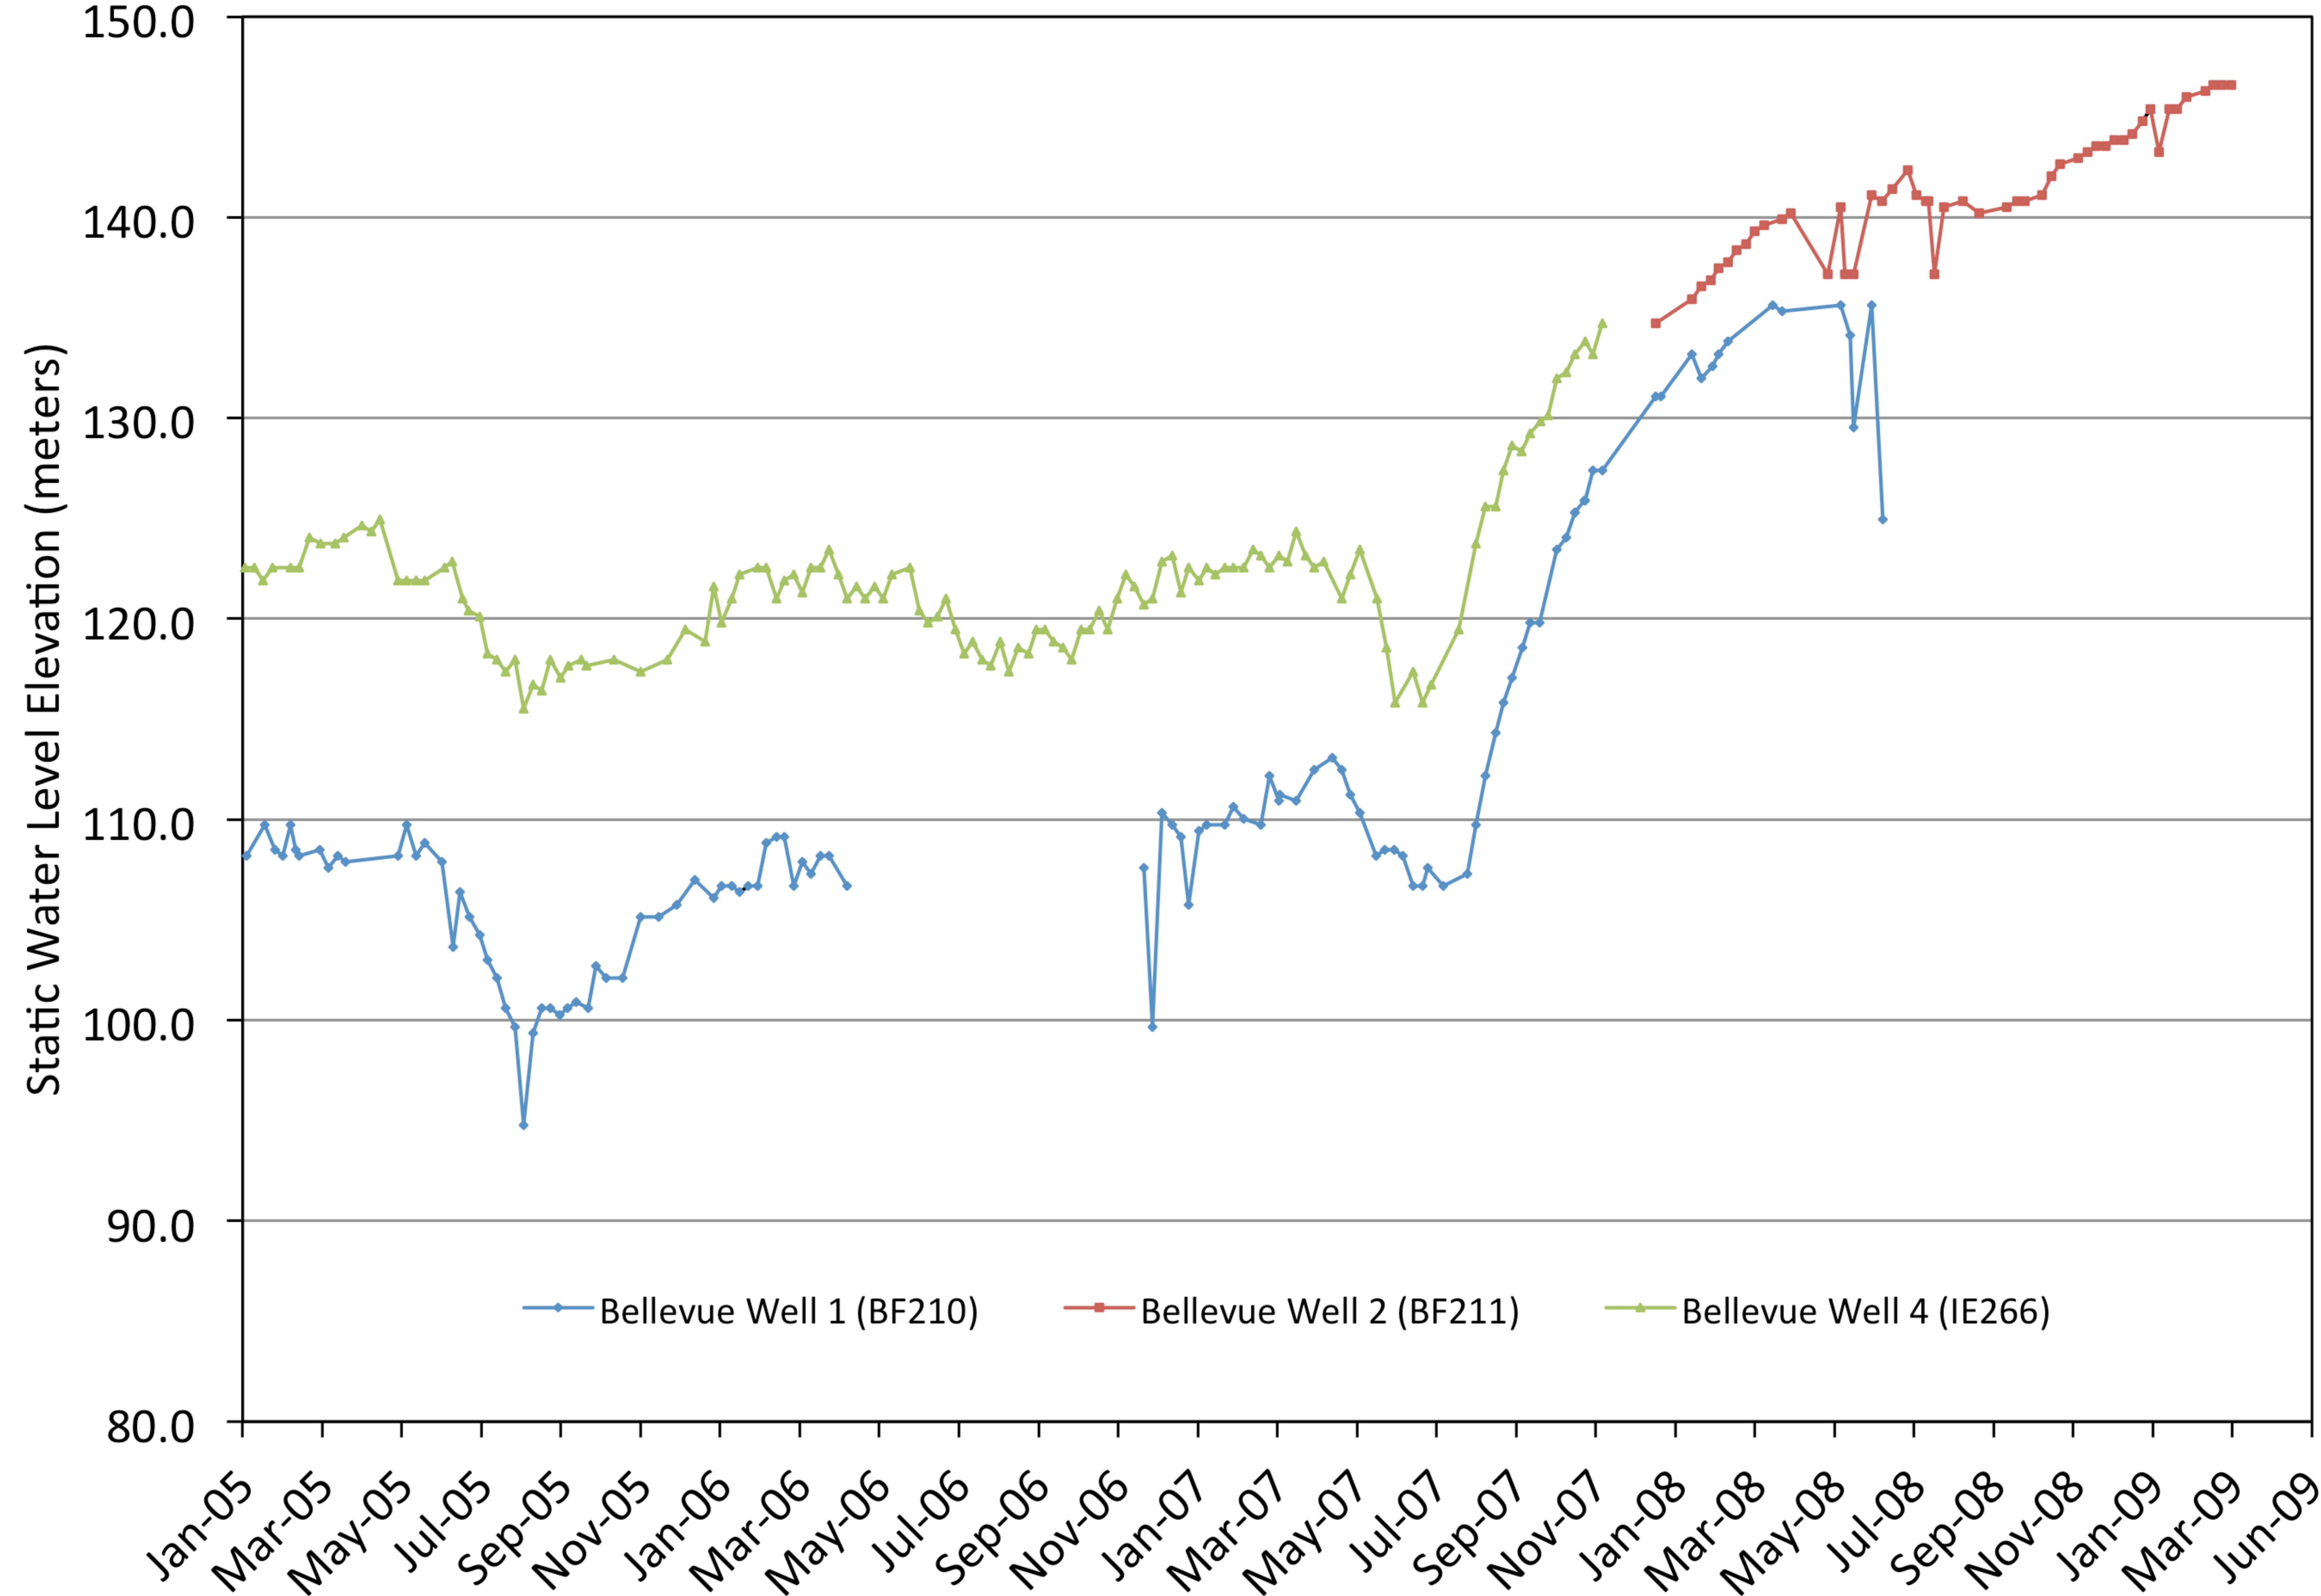

# City of De Pere Hydrographs (Northern Cone, center)

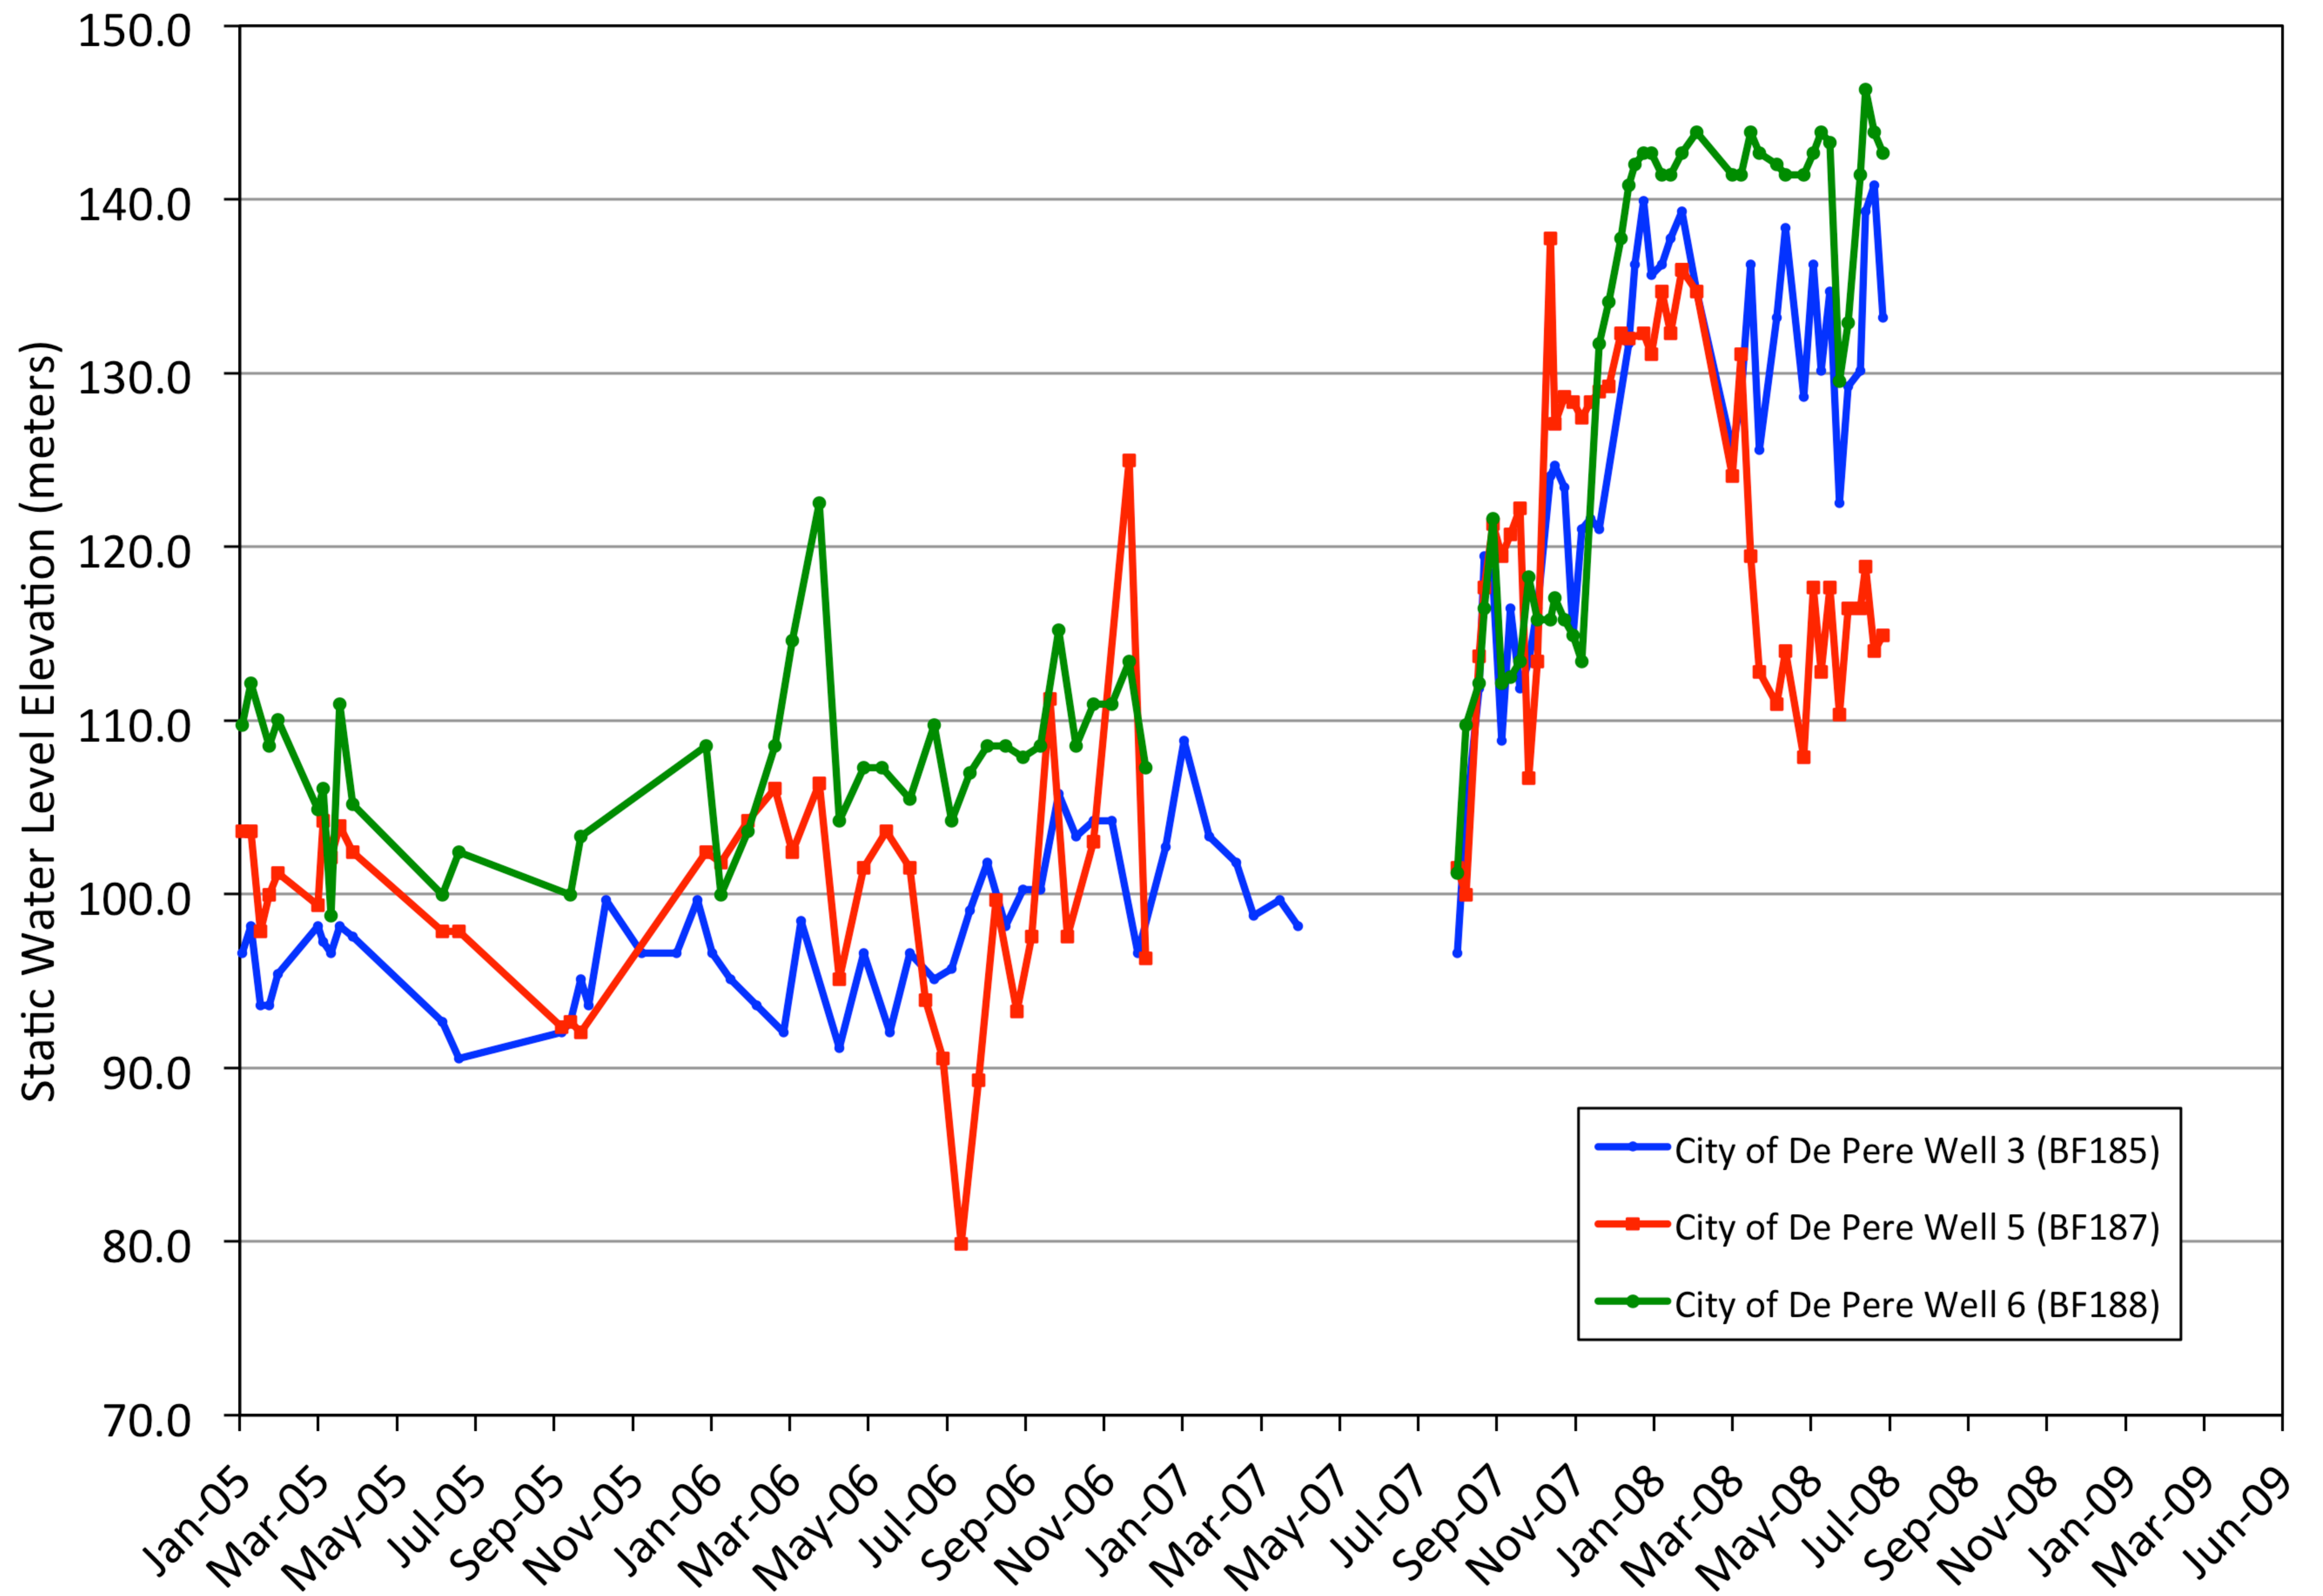

# Village of Hobart Hydrograph (Northern Cone, west side)

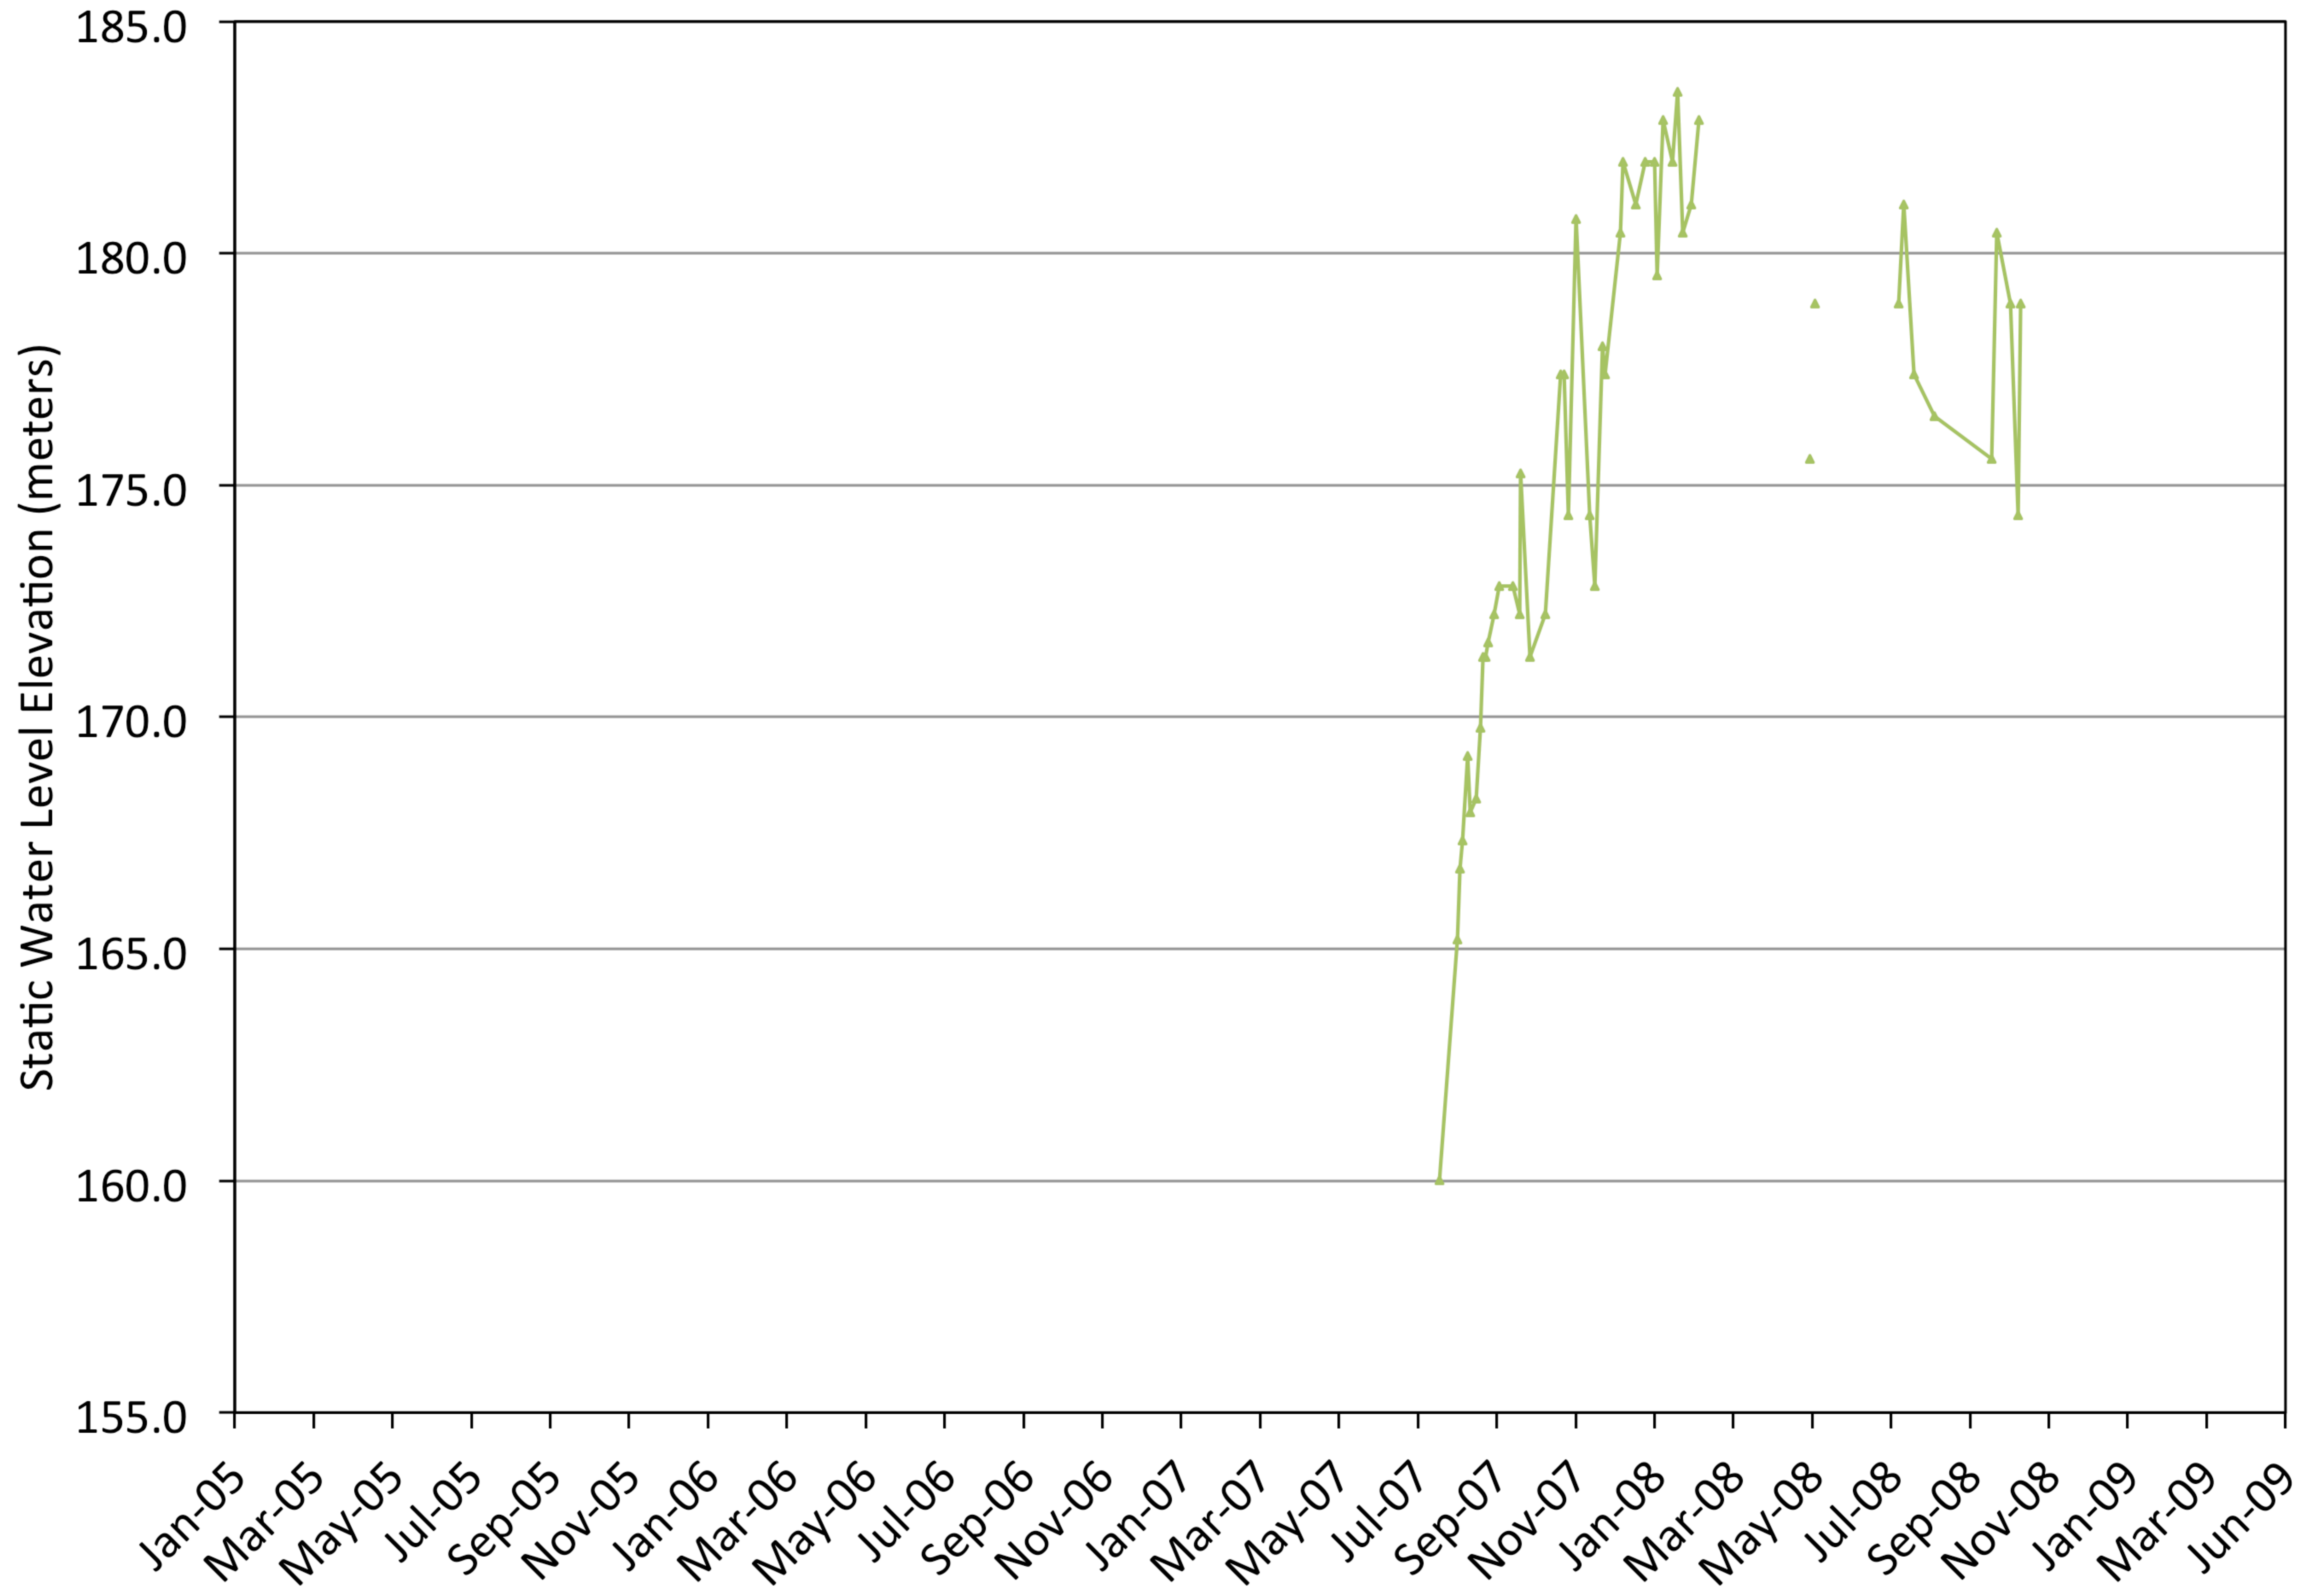

## Village of Howard Hydrograph (Northern Cone, northwest side)

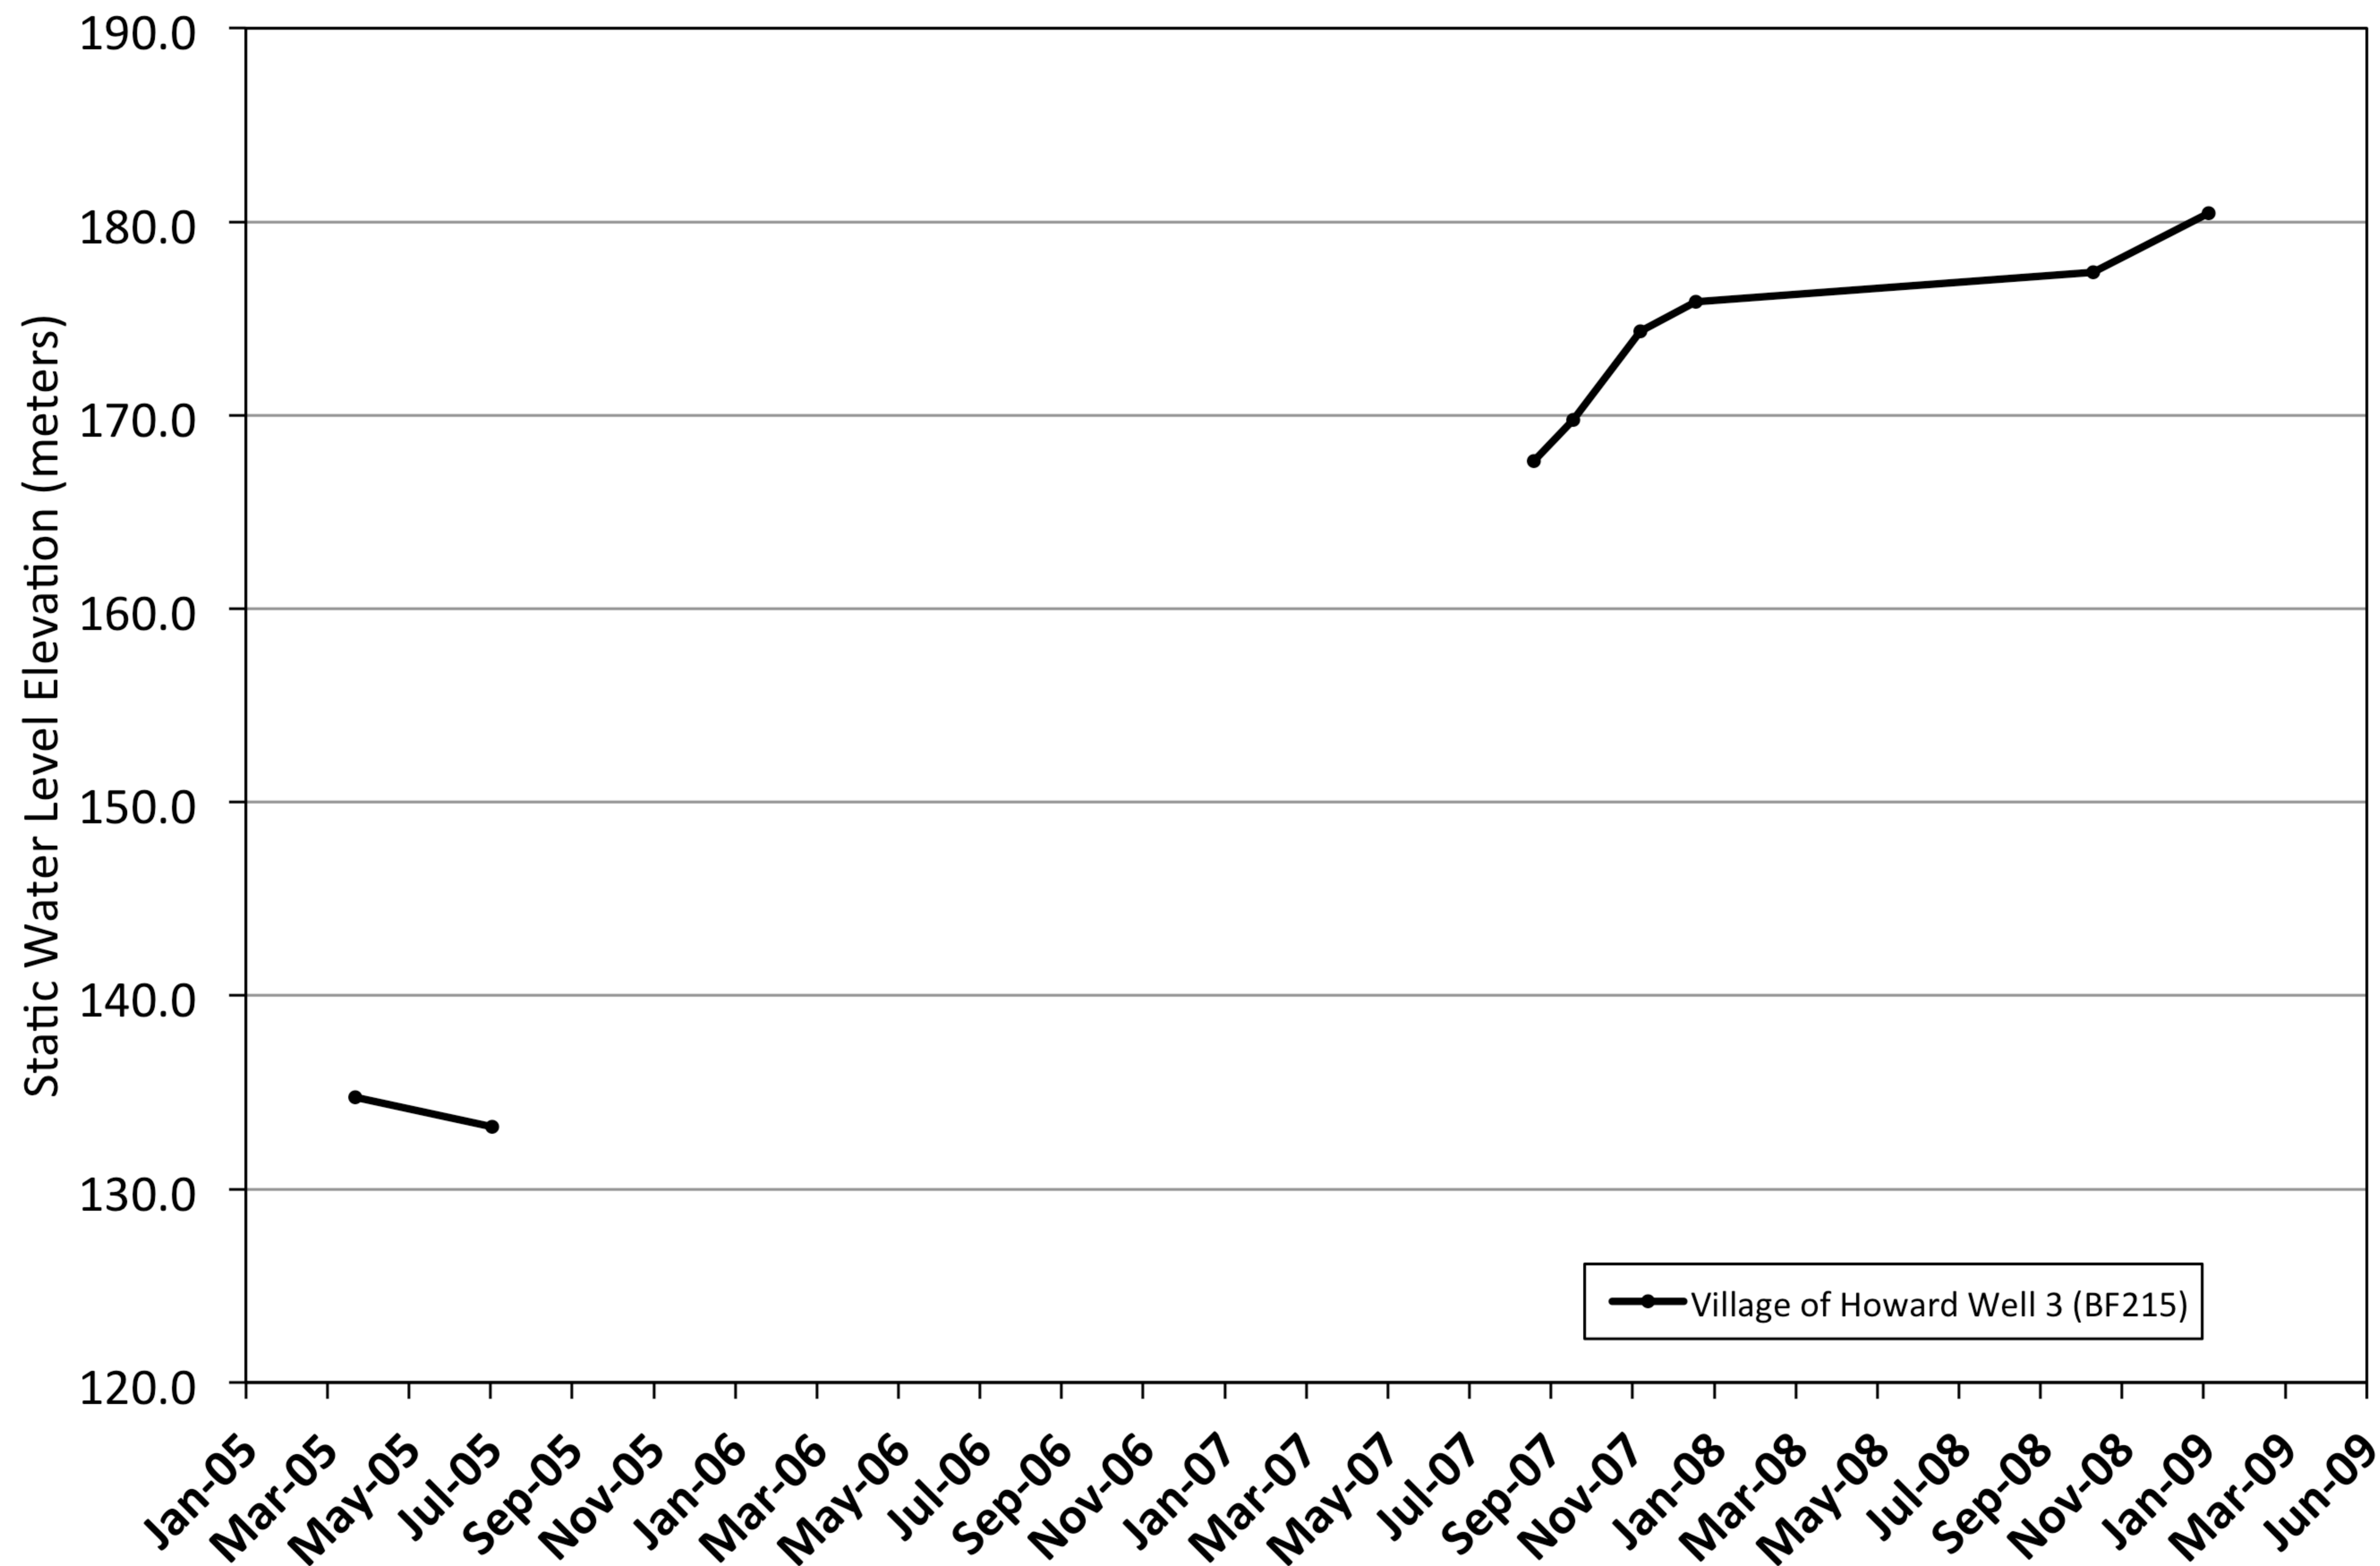

# Hydrographs of Kaukauna Wells (Southern Cone)

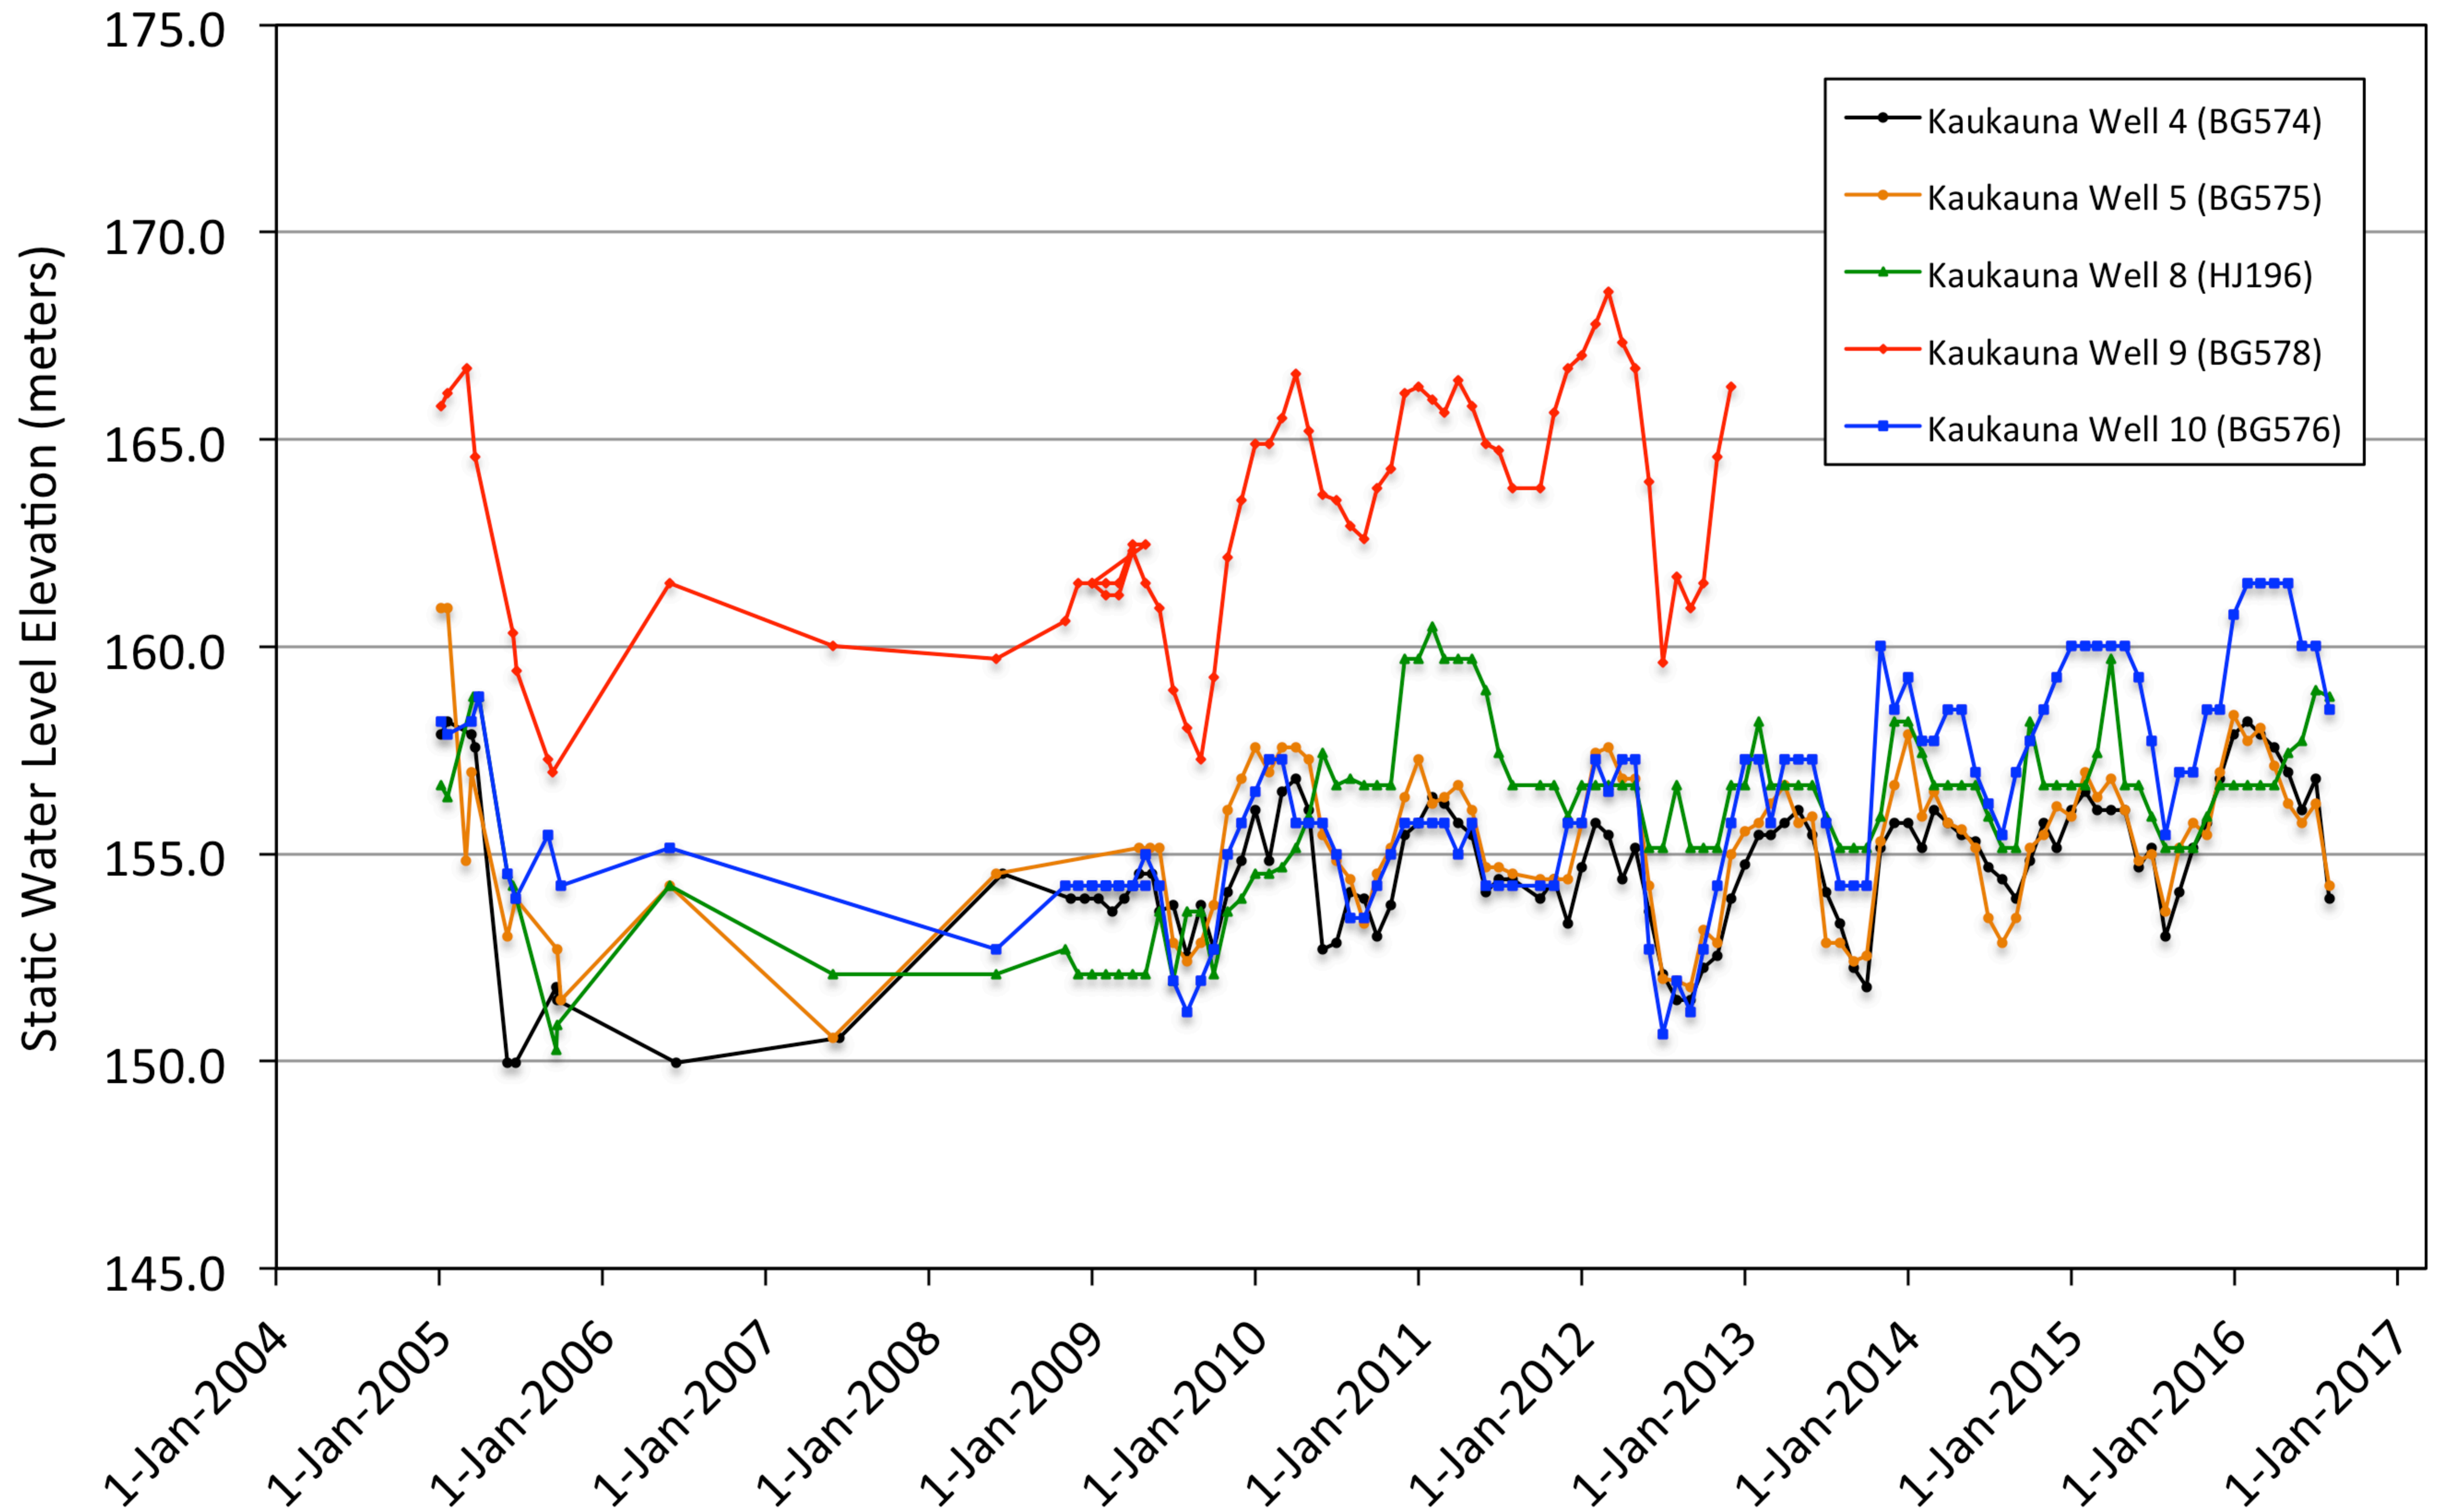

# Hydrographs of Kimberly Wells (Southern Cone)

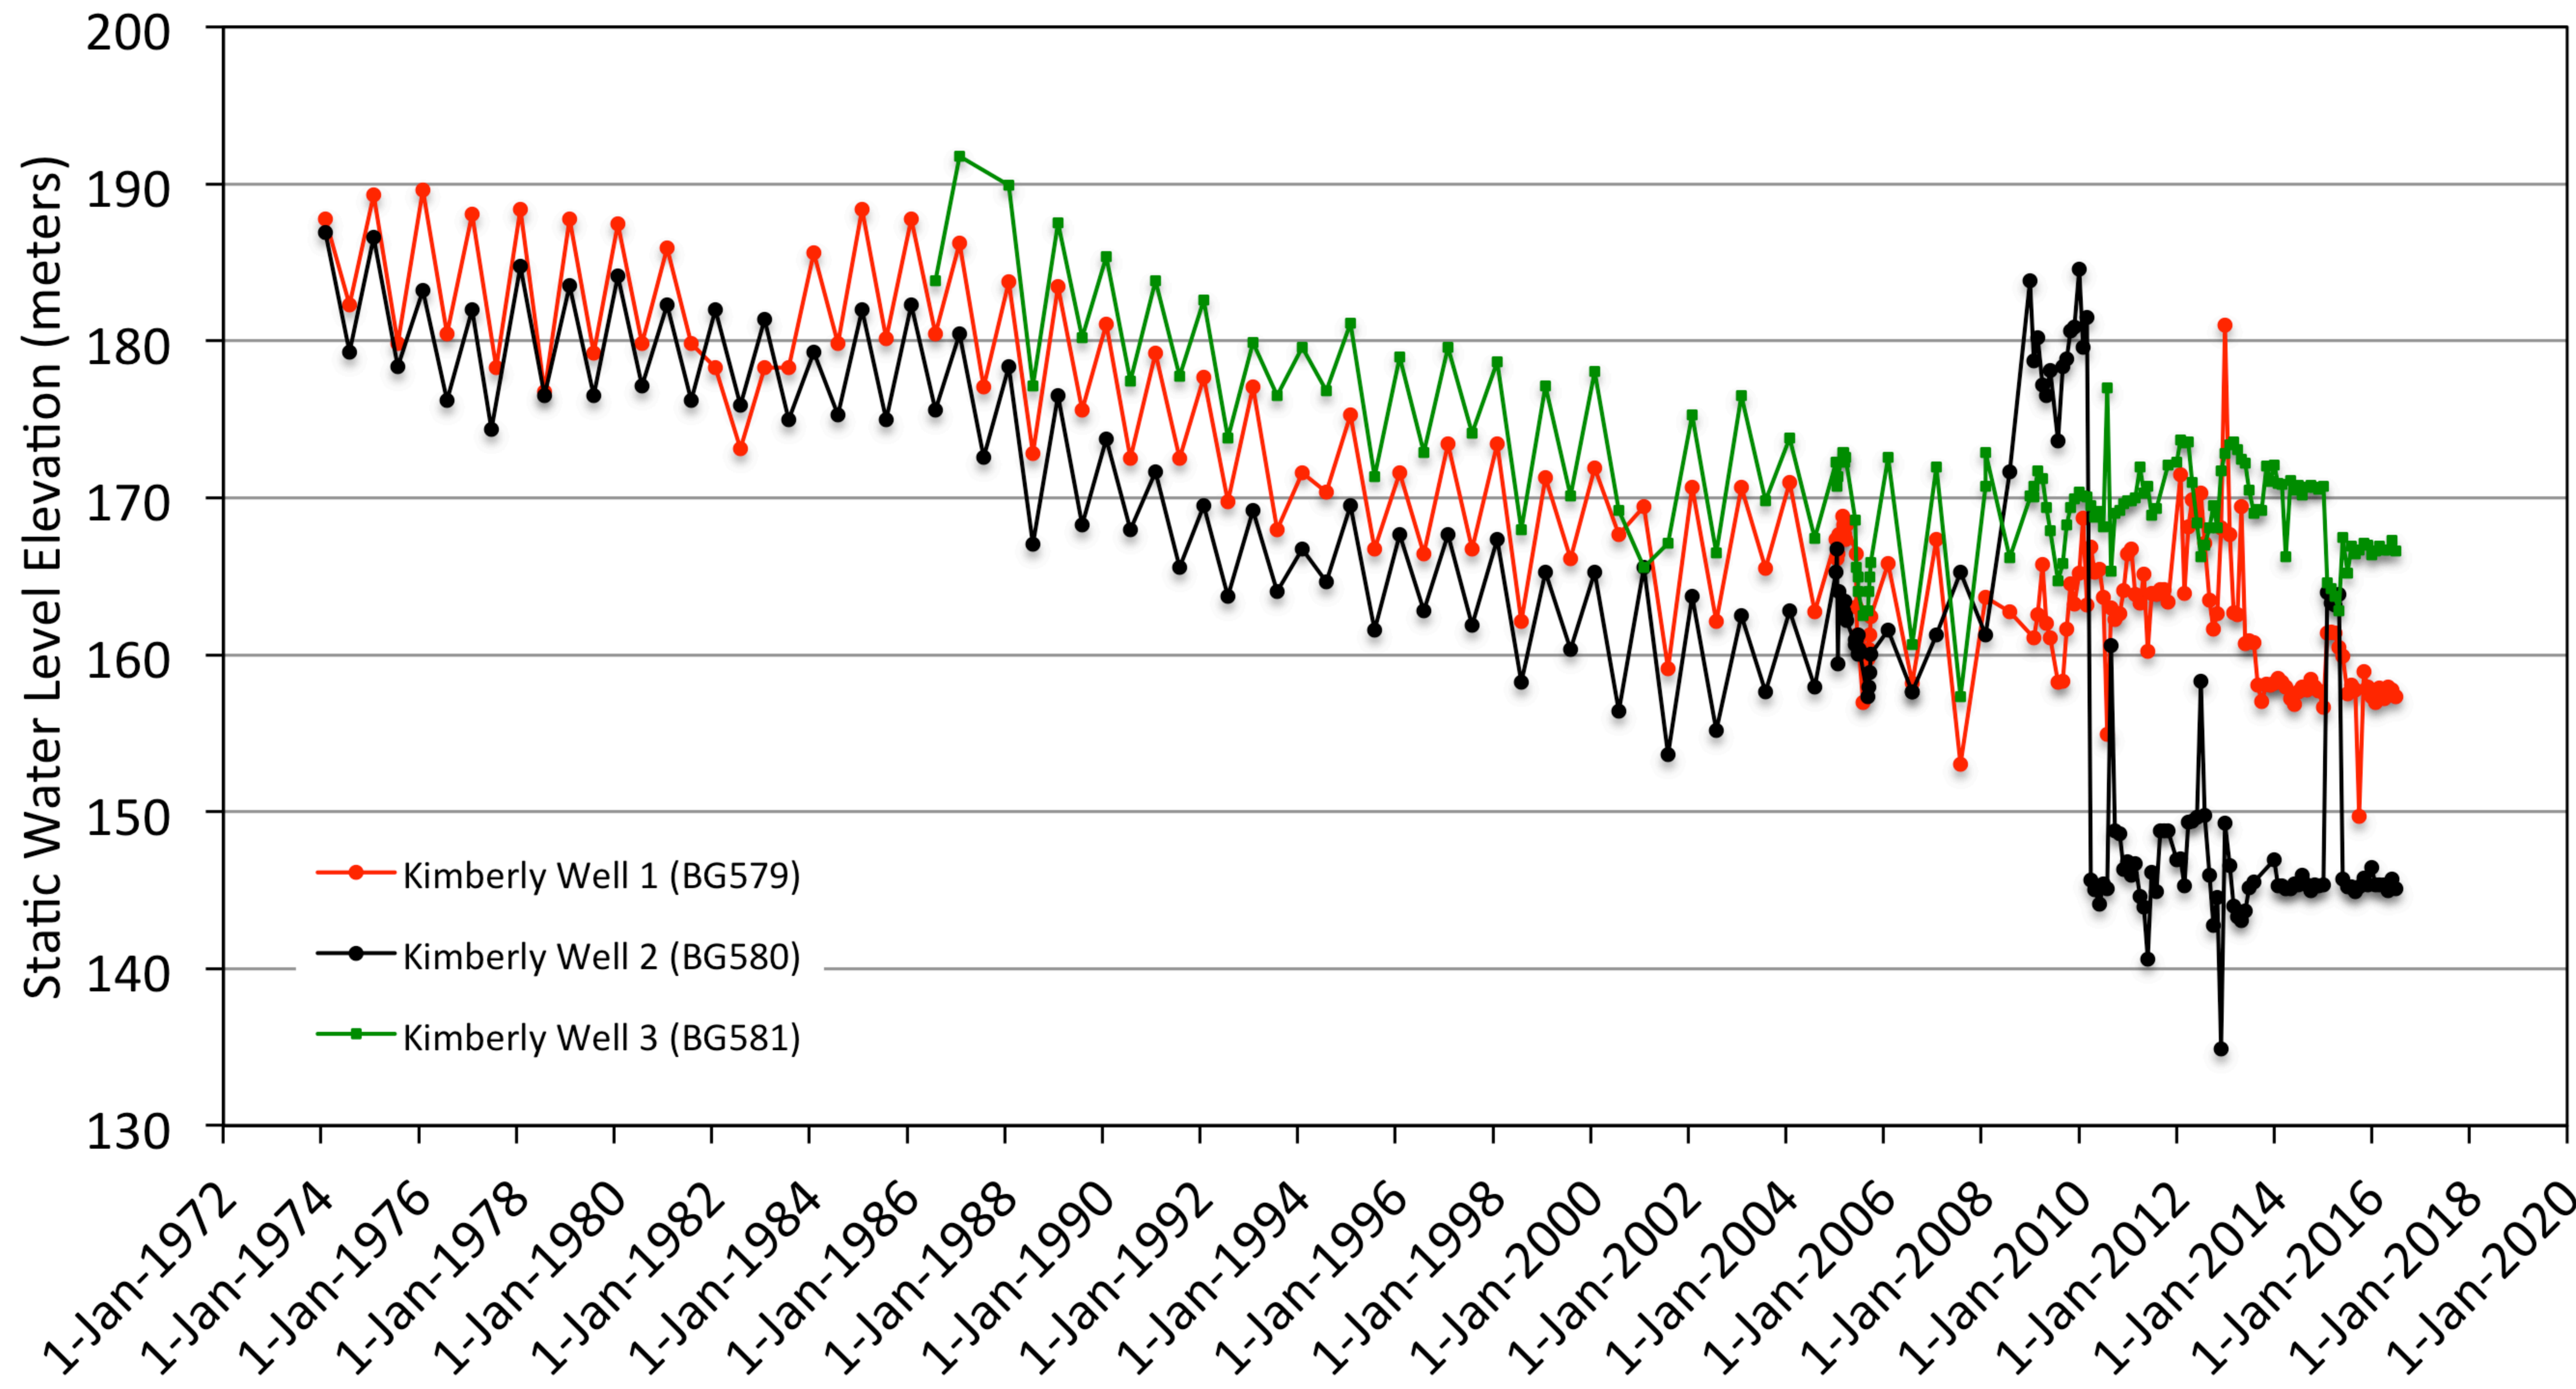

# Hydrographs of Little Chute Wells (Southern Cone)

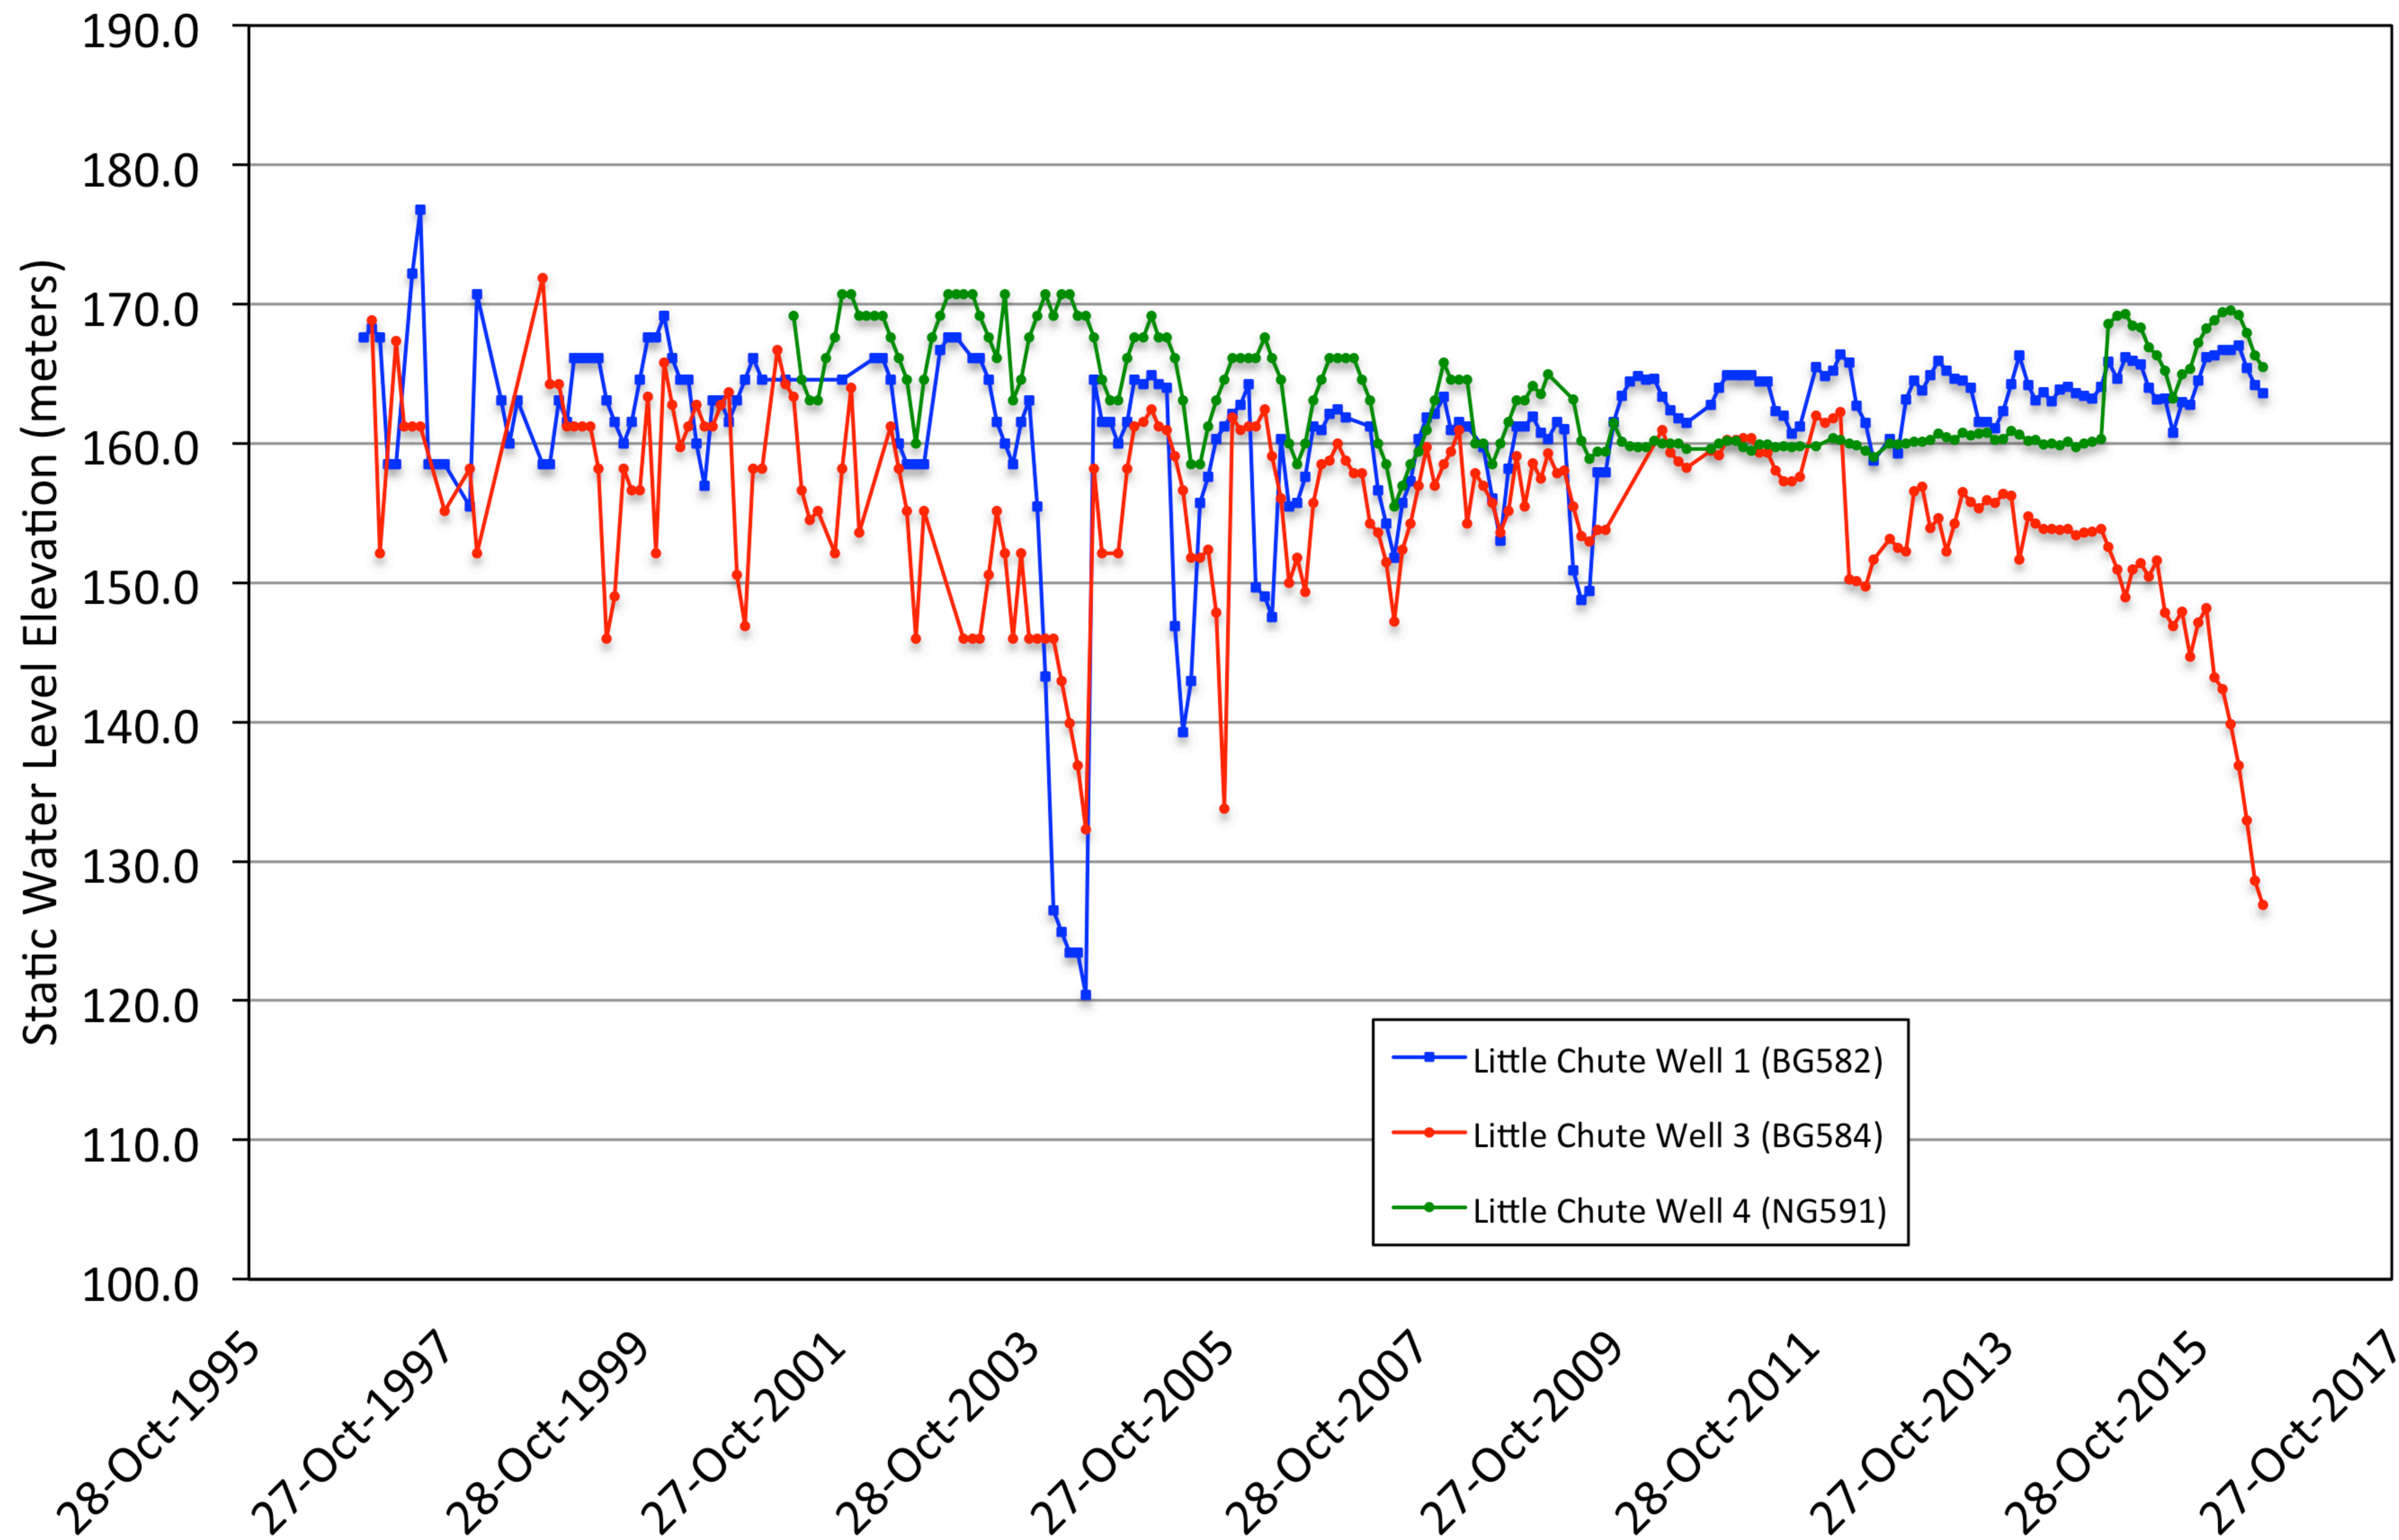

# Town of Scott Hydrograph (Northern Cone, northeast side)

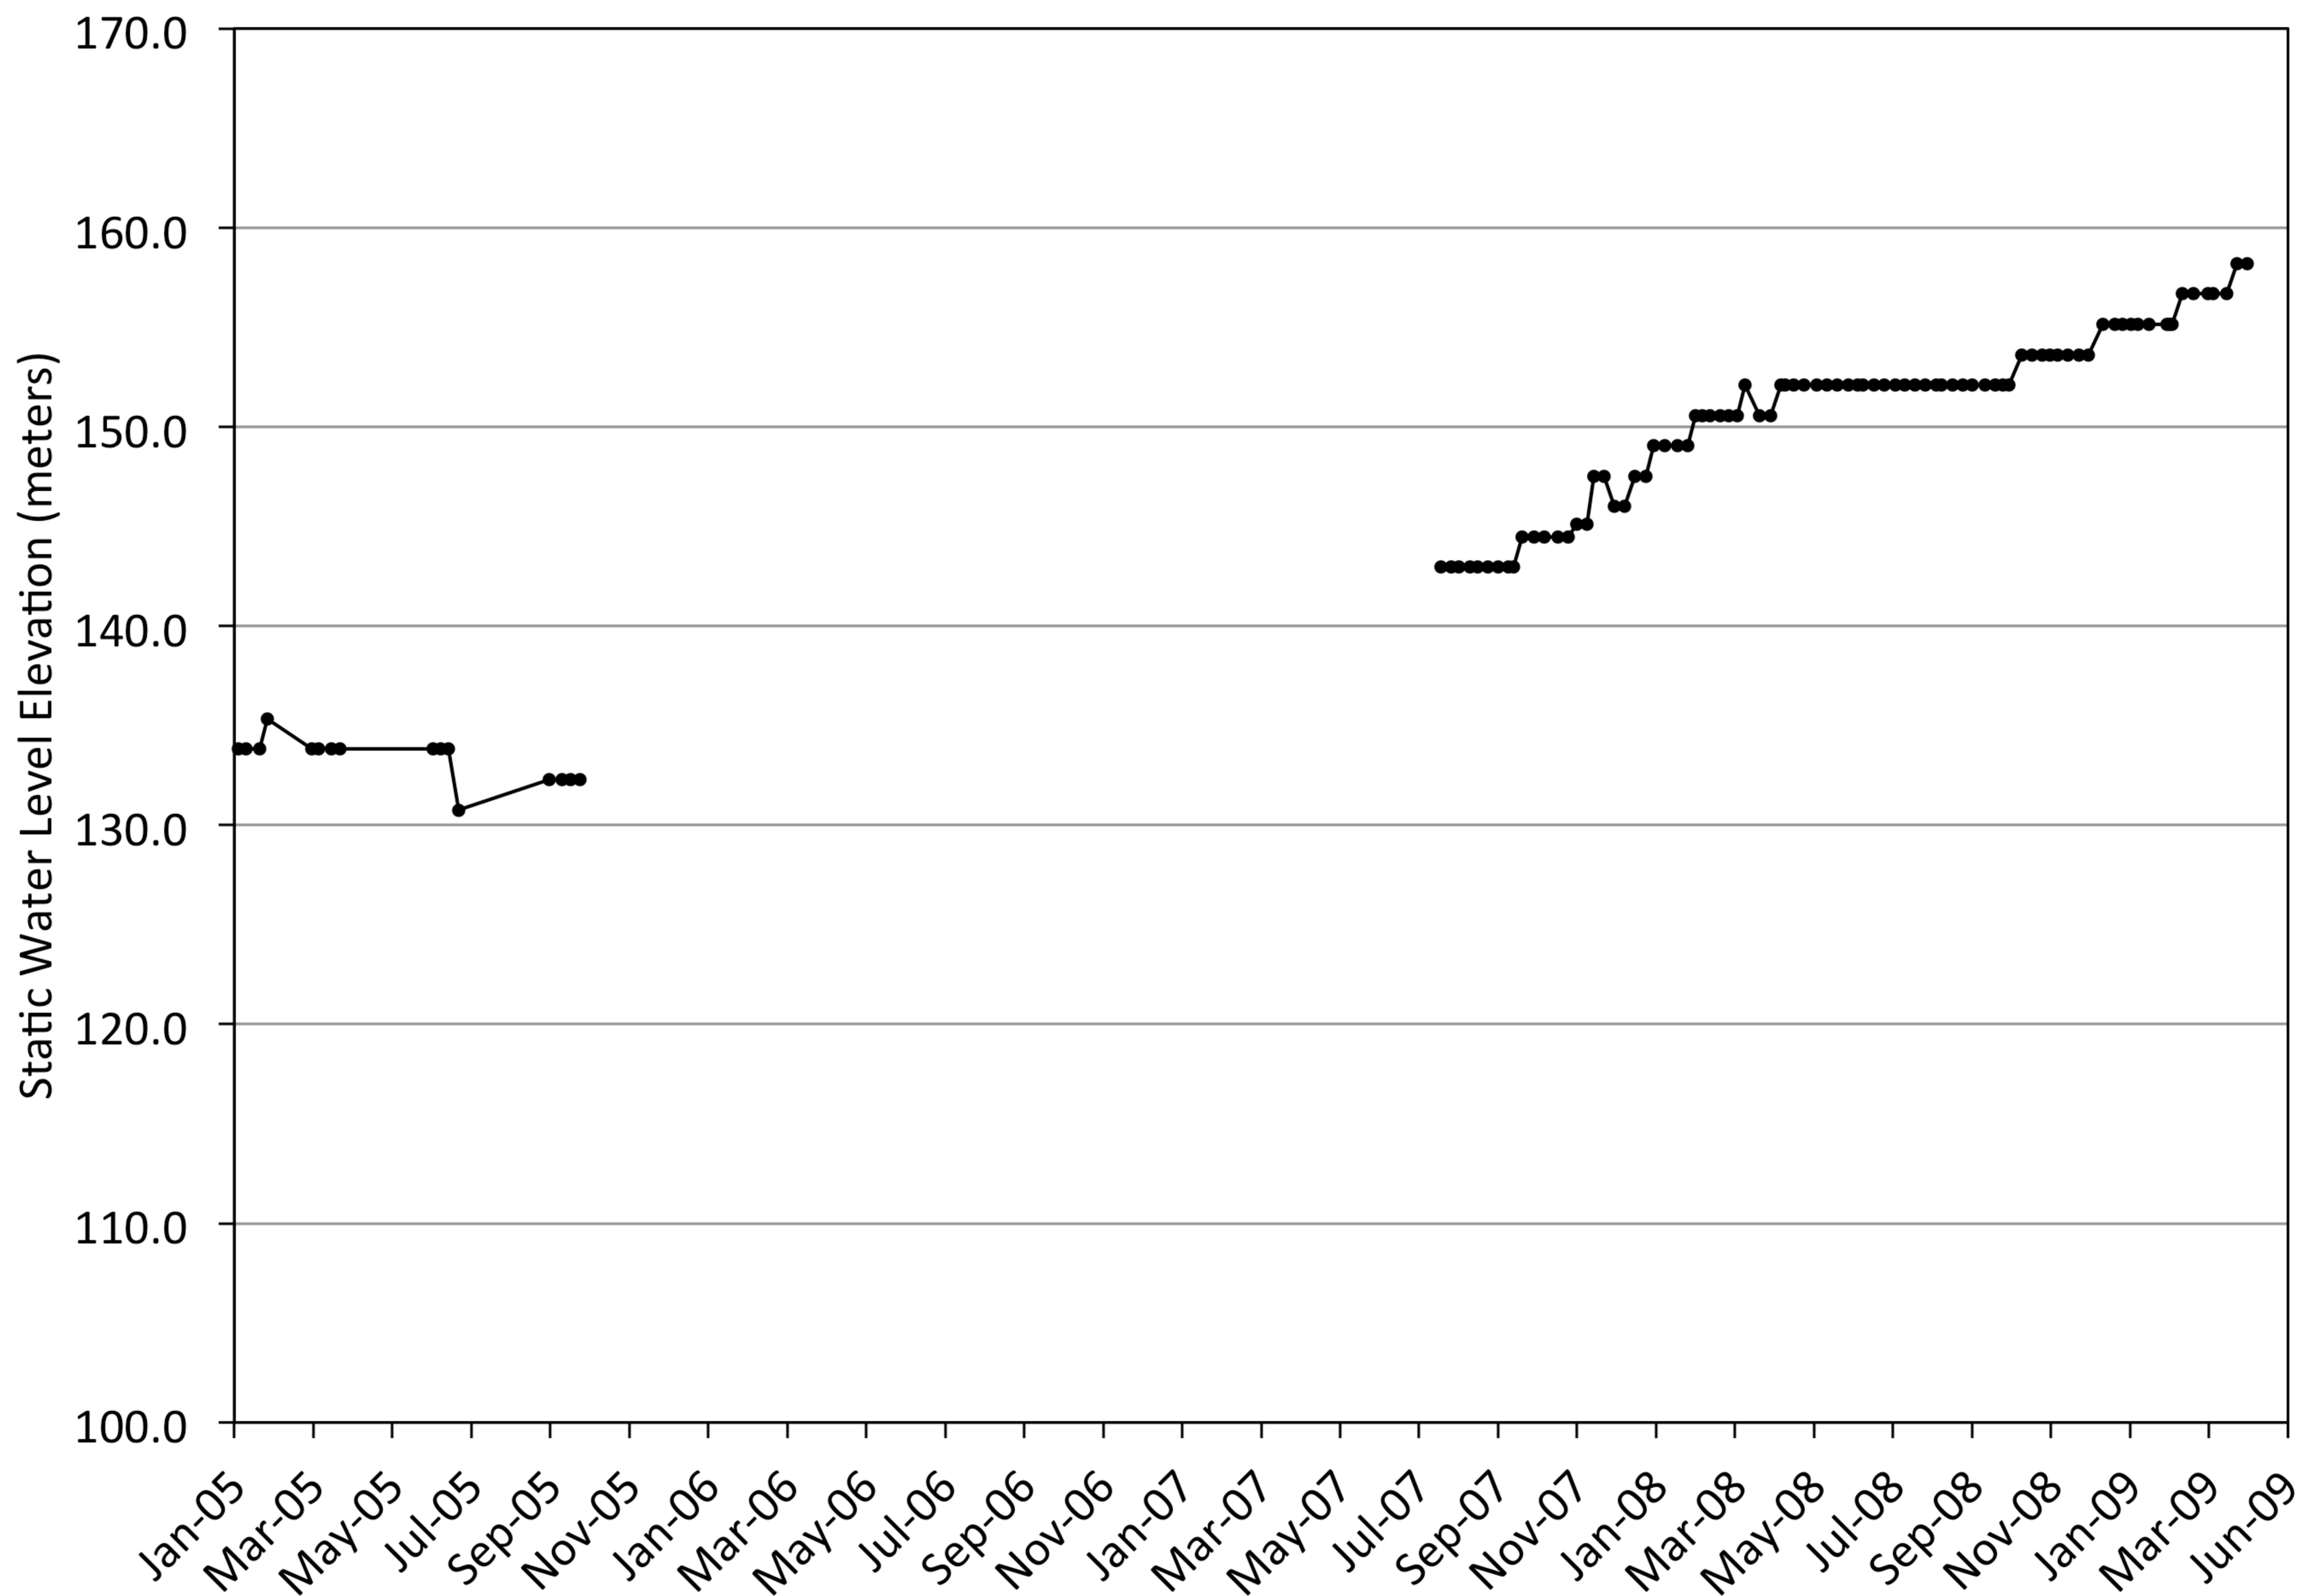

# Hydrograph of Town of Holland Well 2 (CL048; East of Southern Cone)

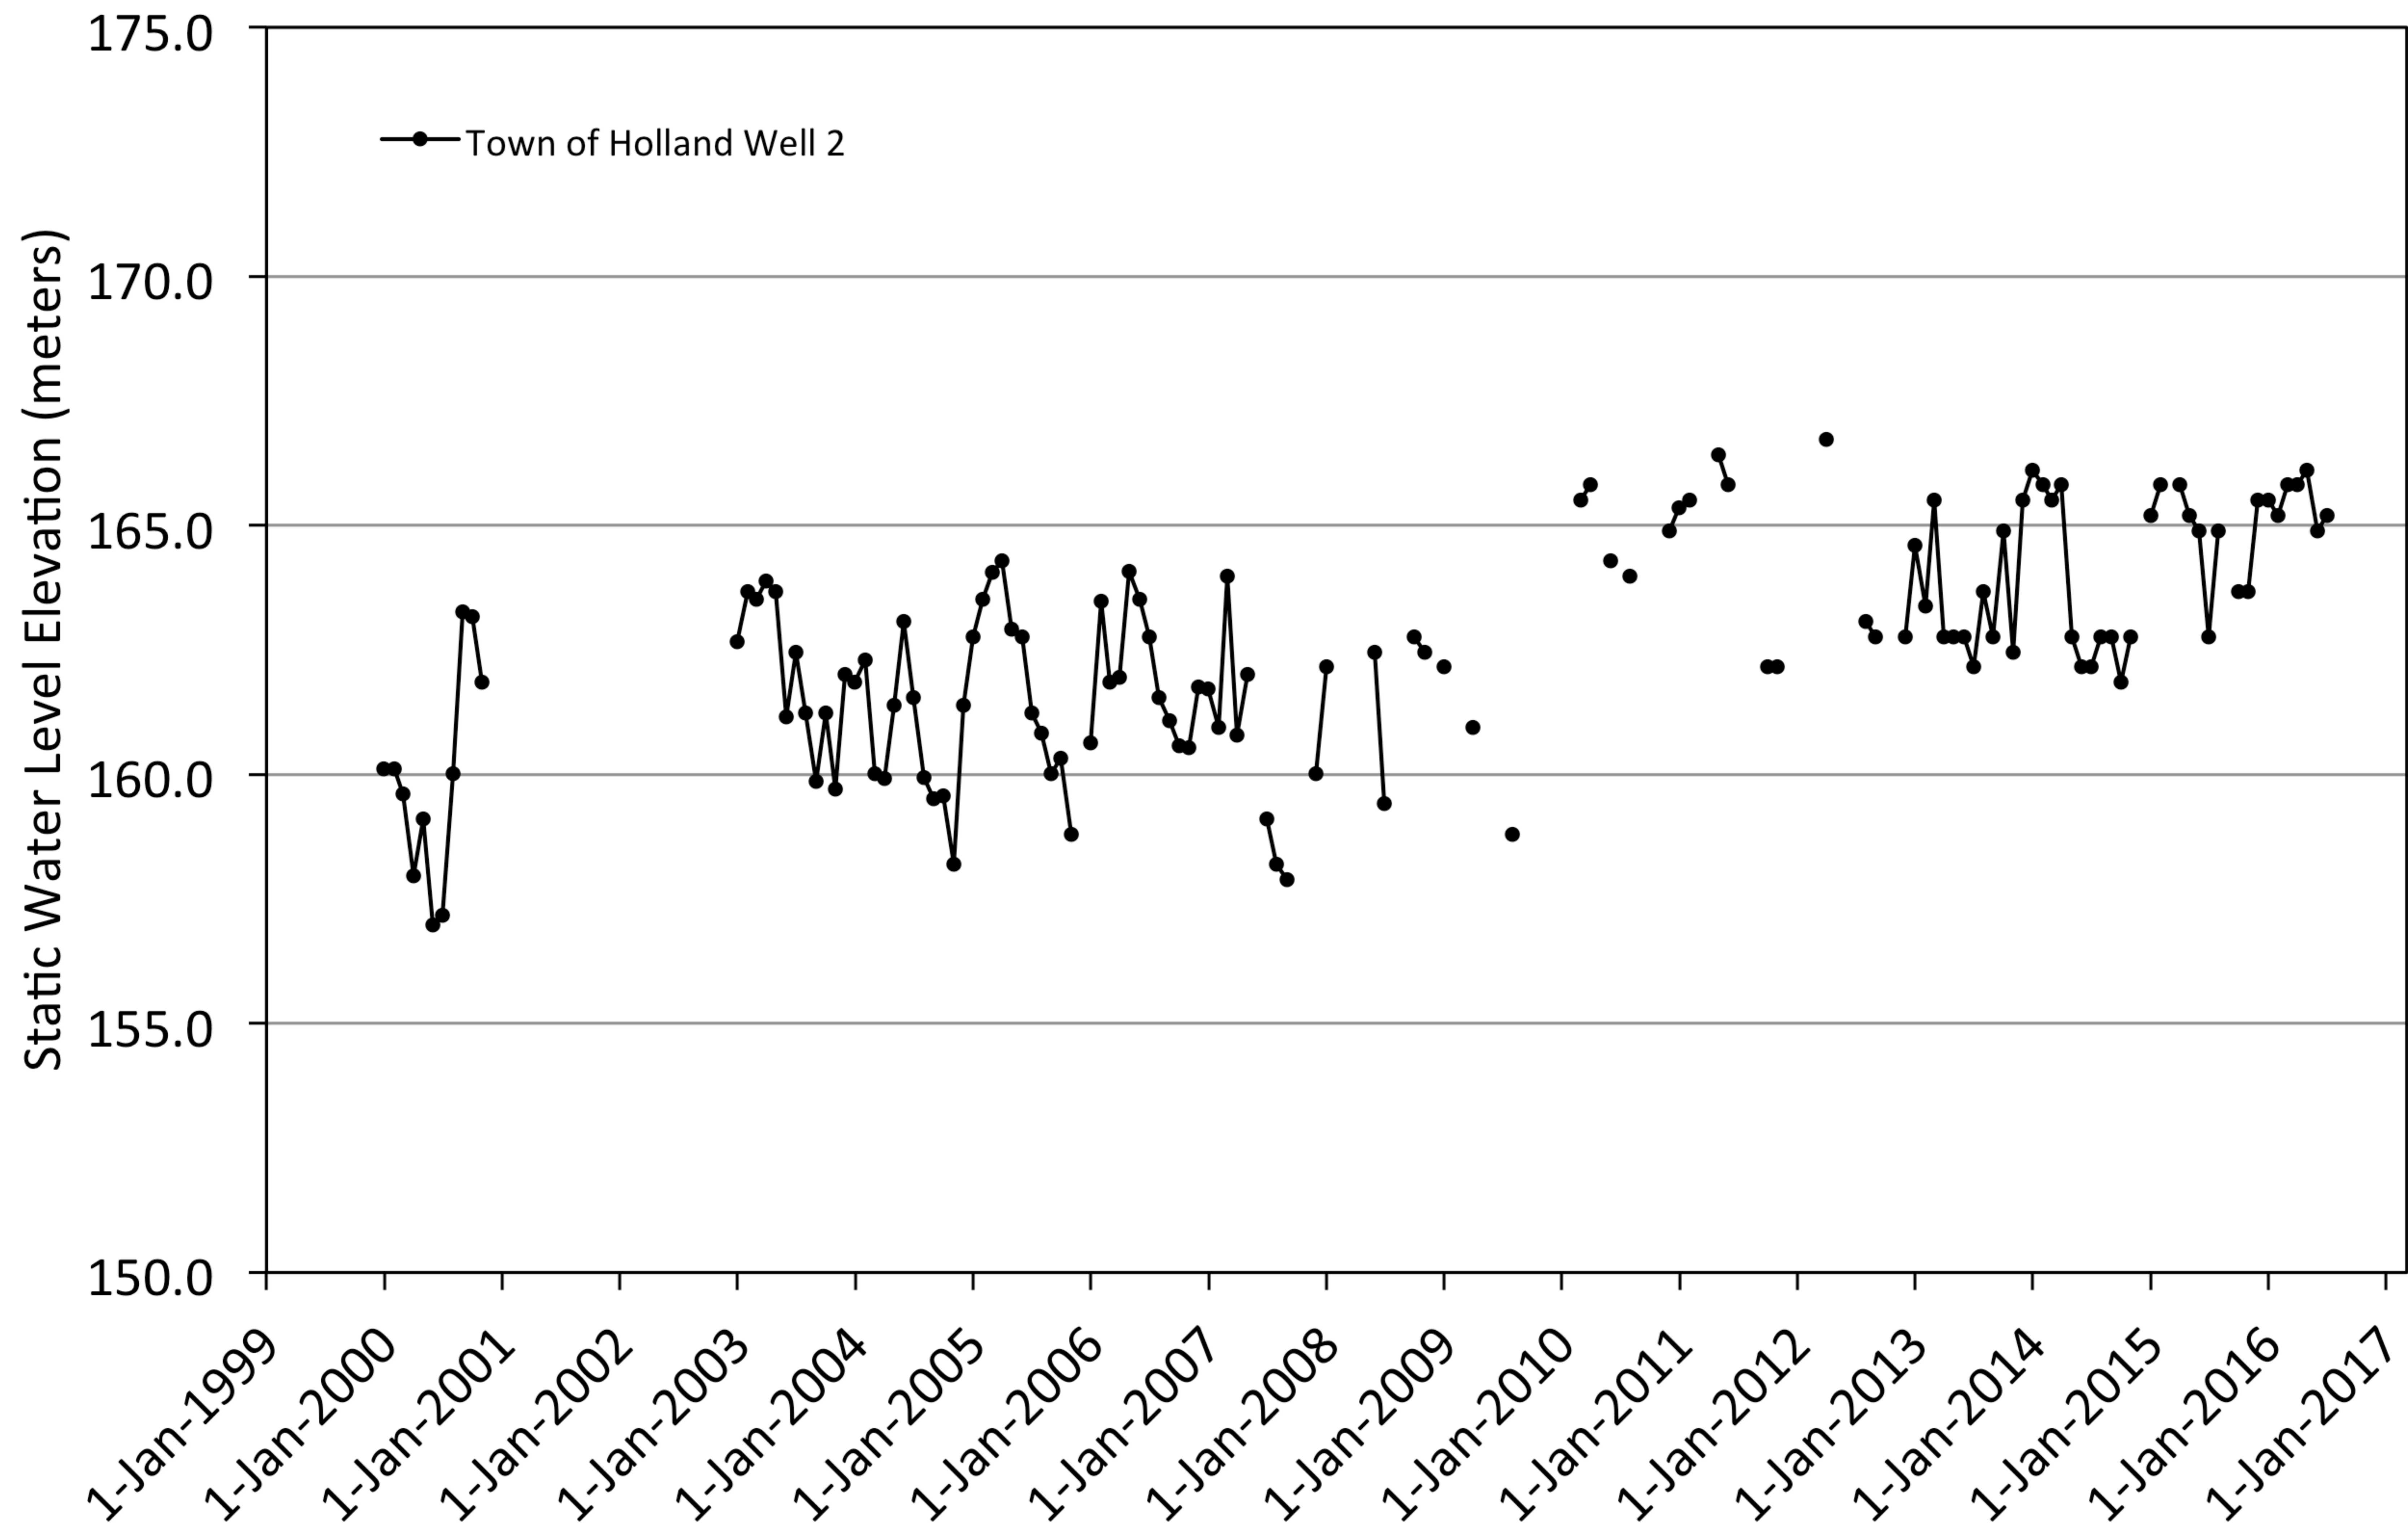

# Hydrographs of Darboy Wells (Southern Cone)

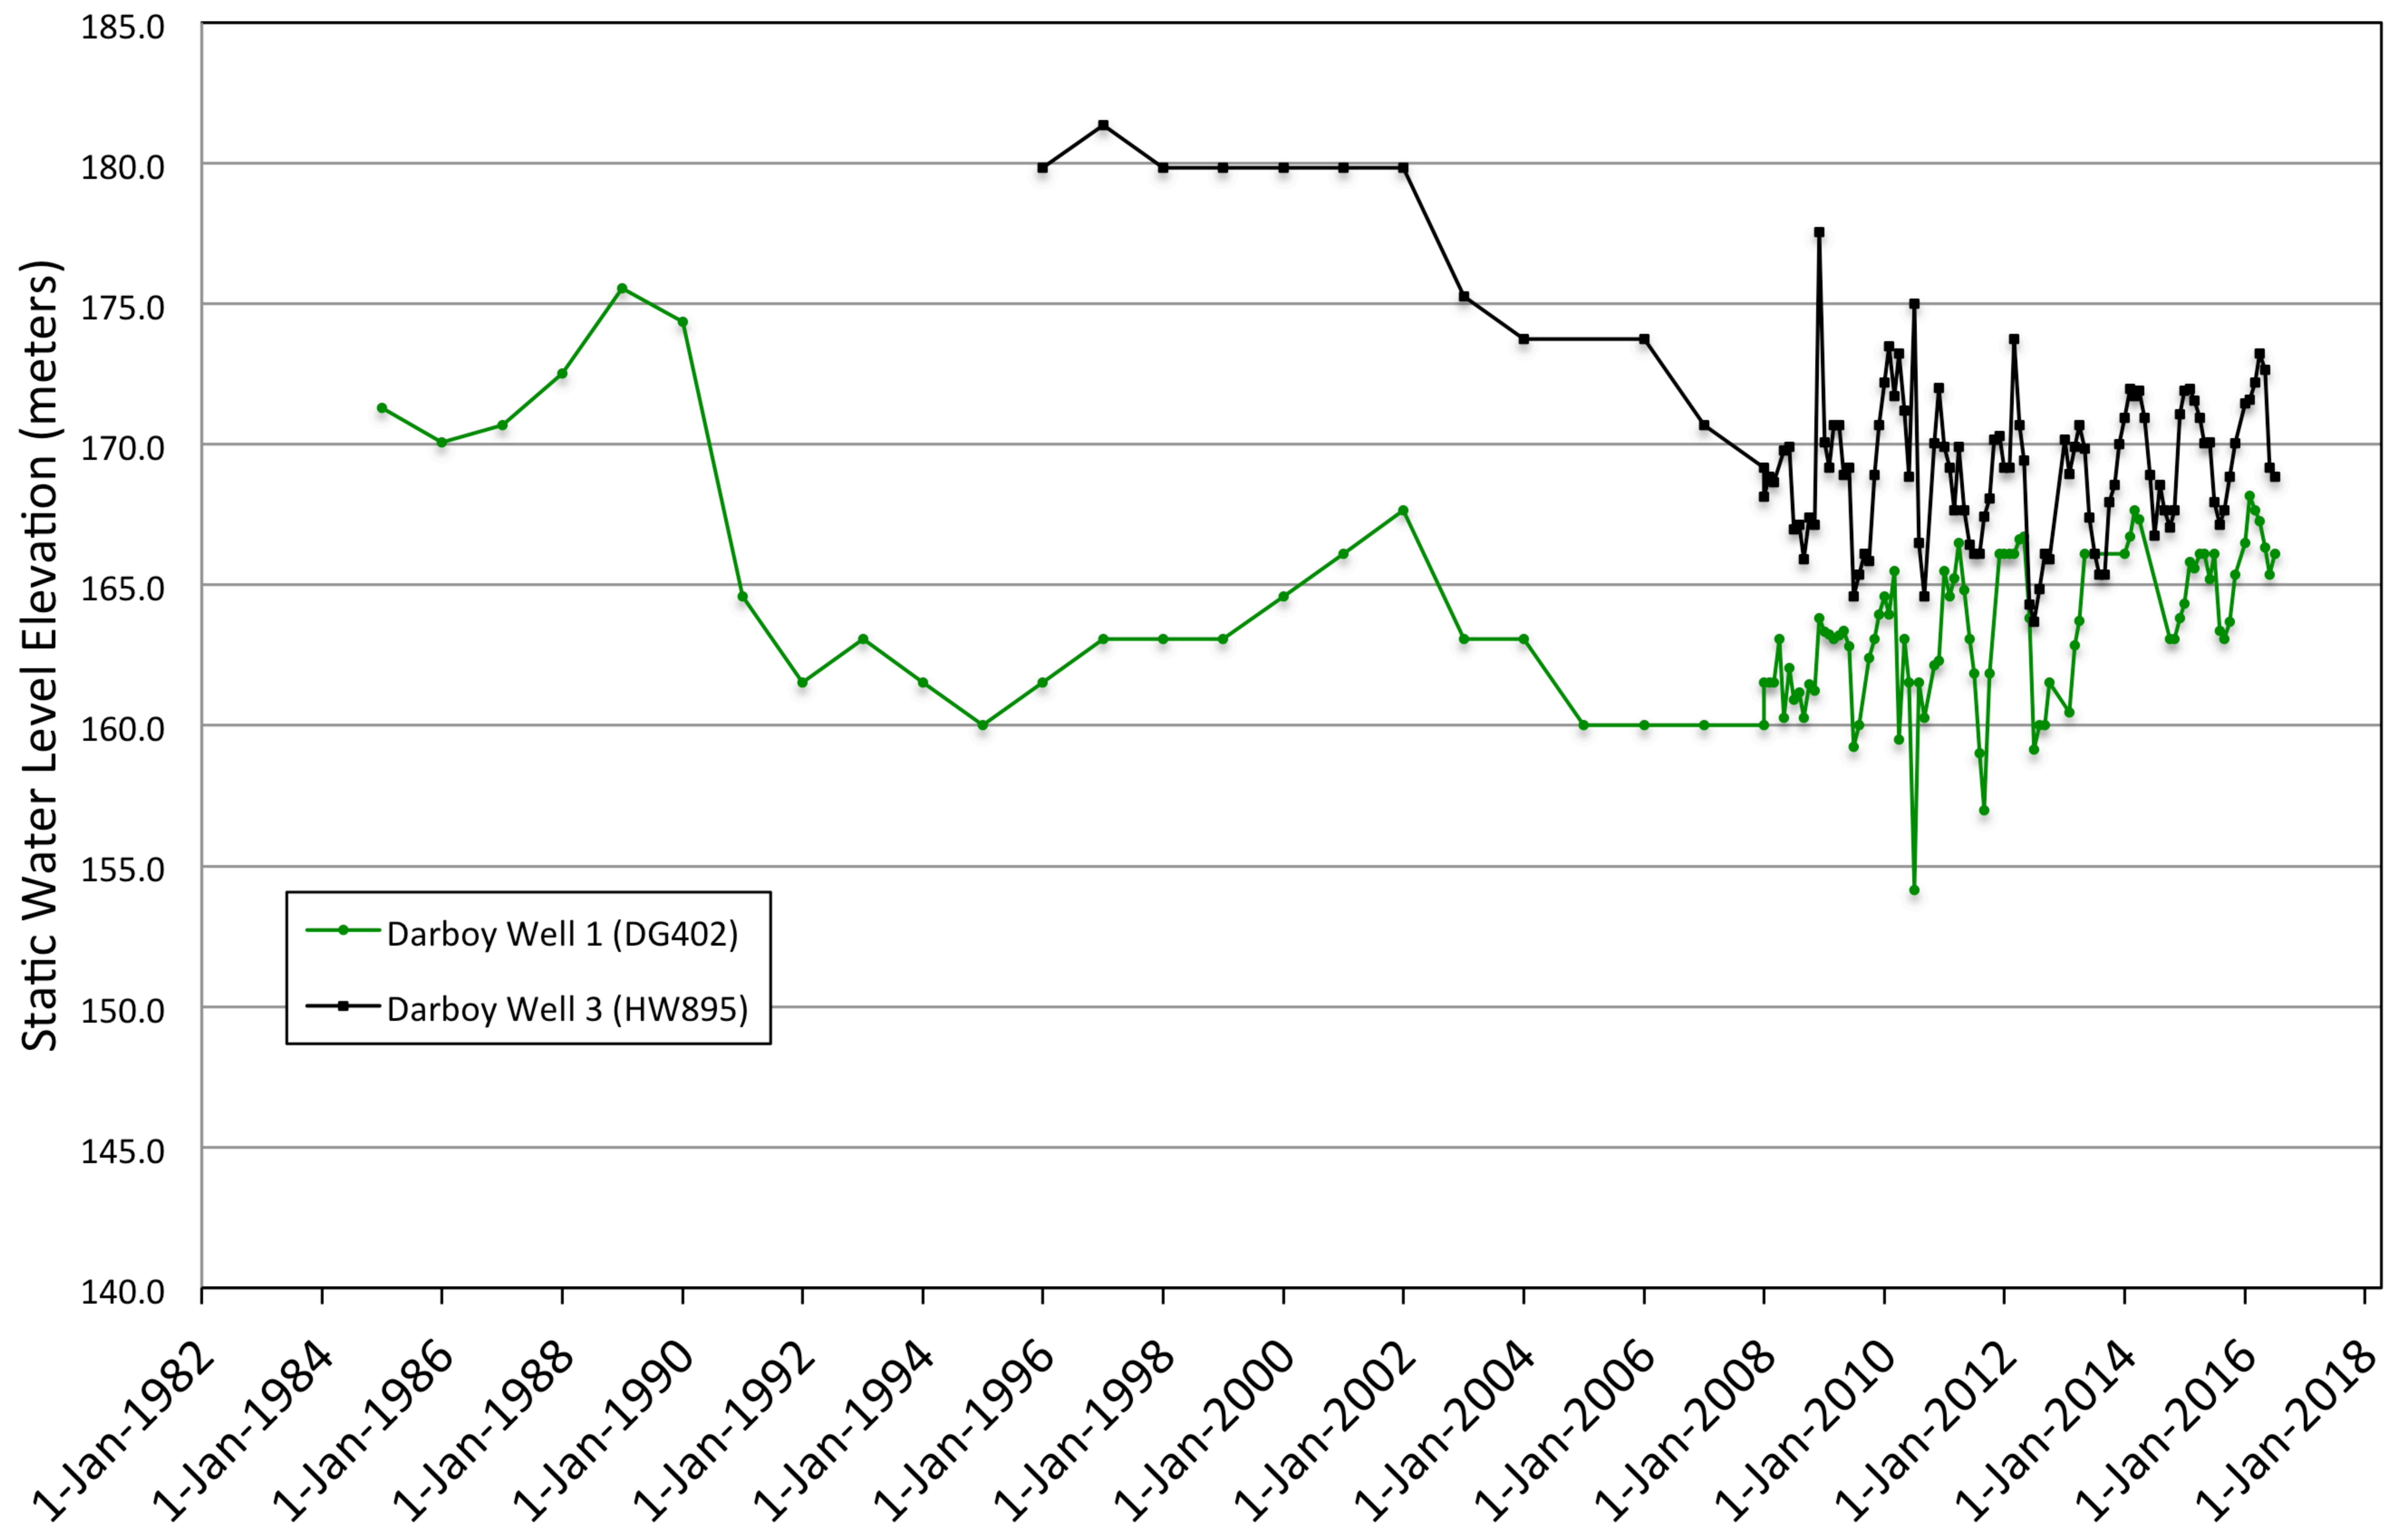

## Wrightstown Hydrographs (in Brown County, between two major cones)

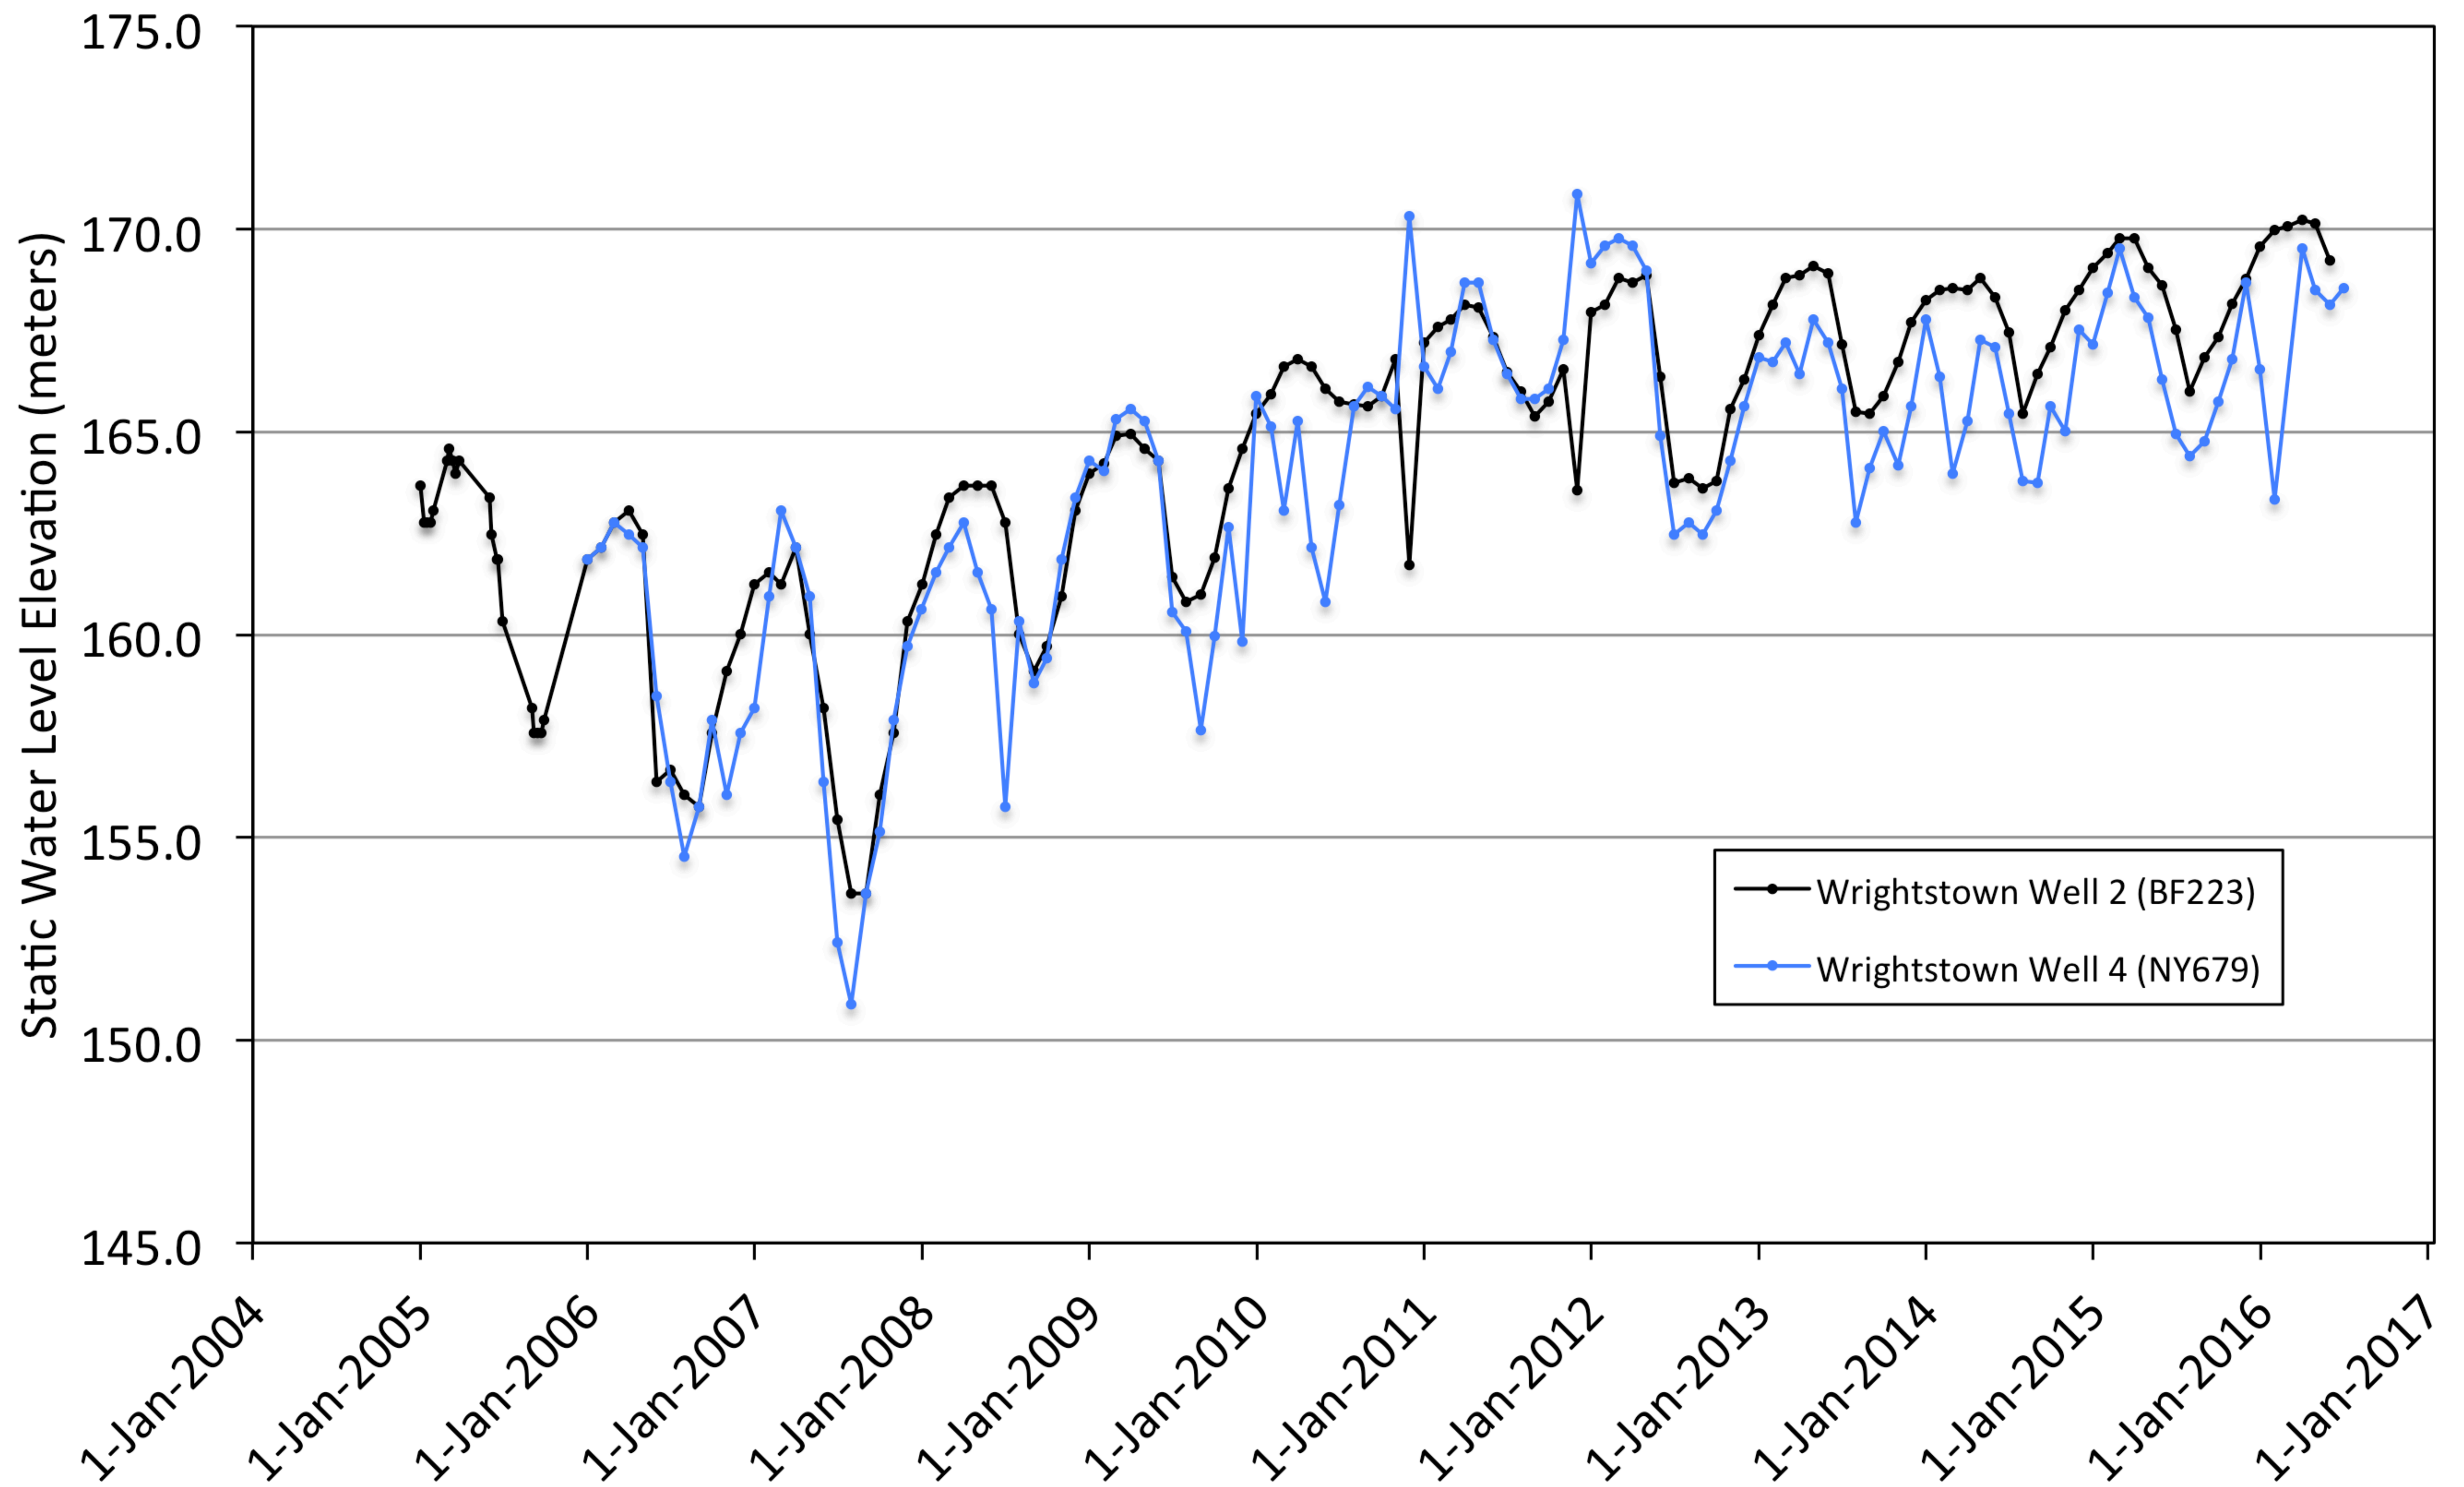

## Hydrographs of Forest Junction Wells (Calumet County; southeast of southern cone)

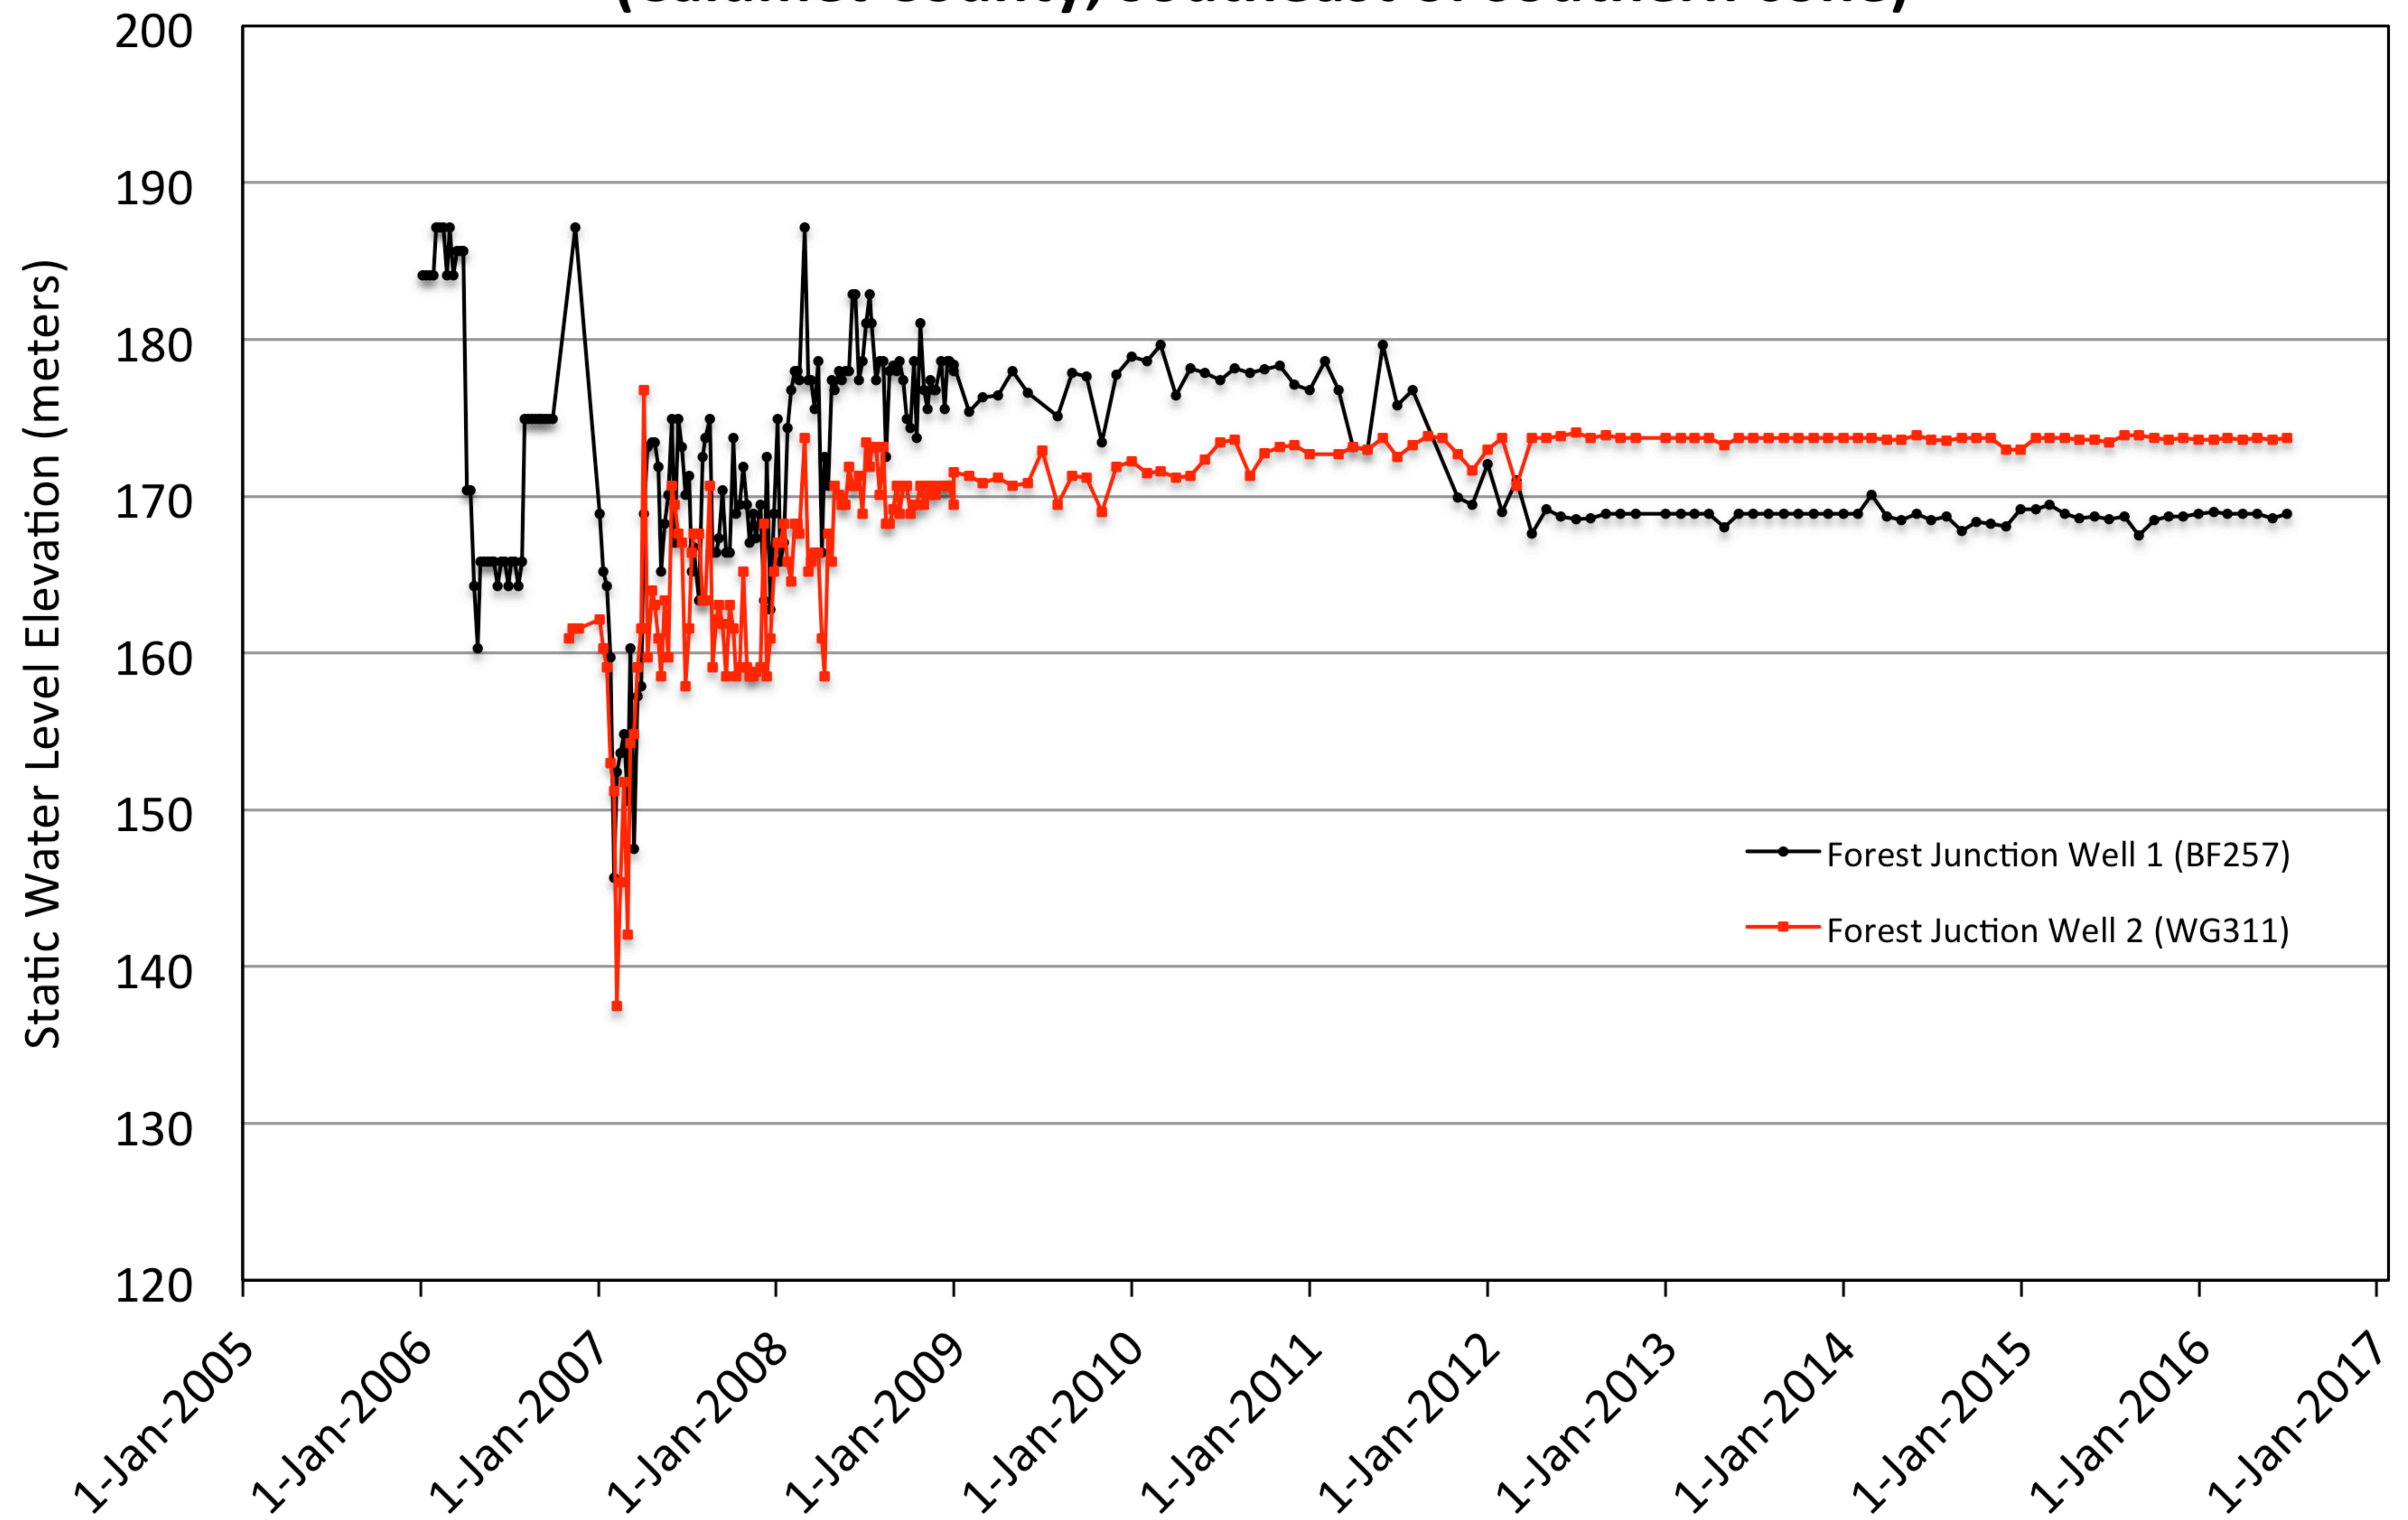

**Village of Pulaski (far northwest part of GMA; not in either cone)**

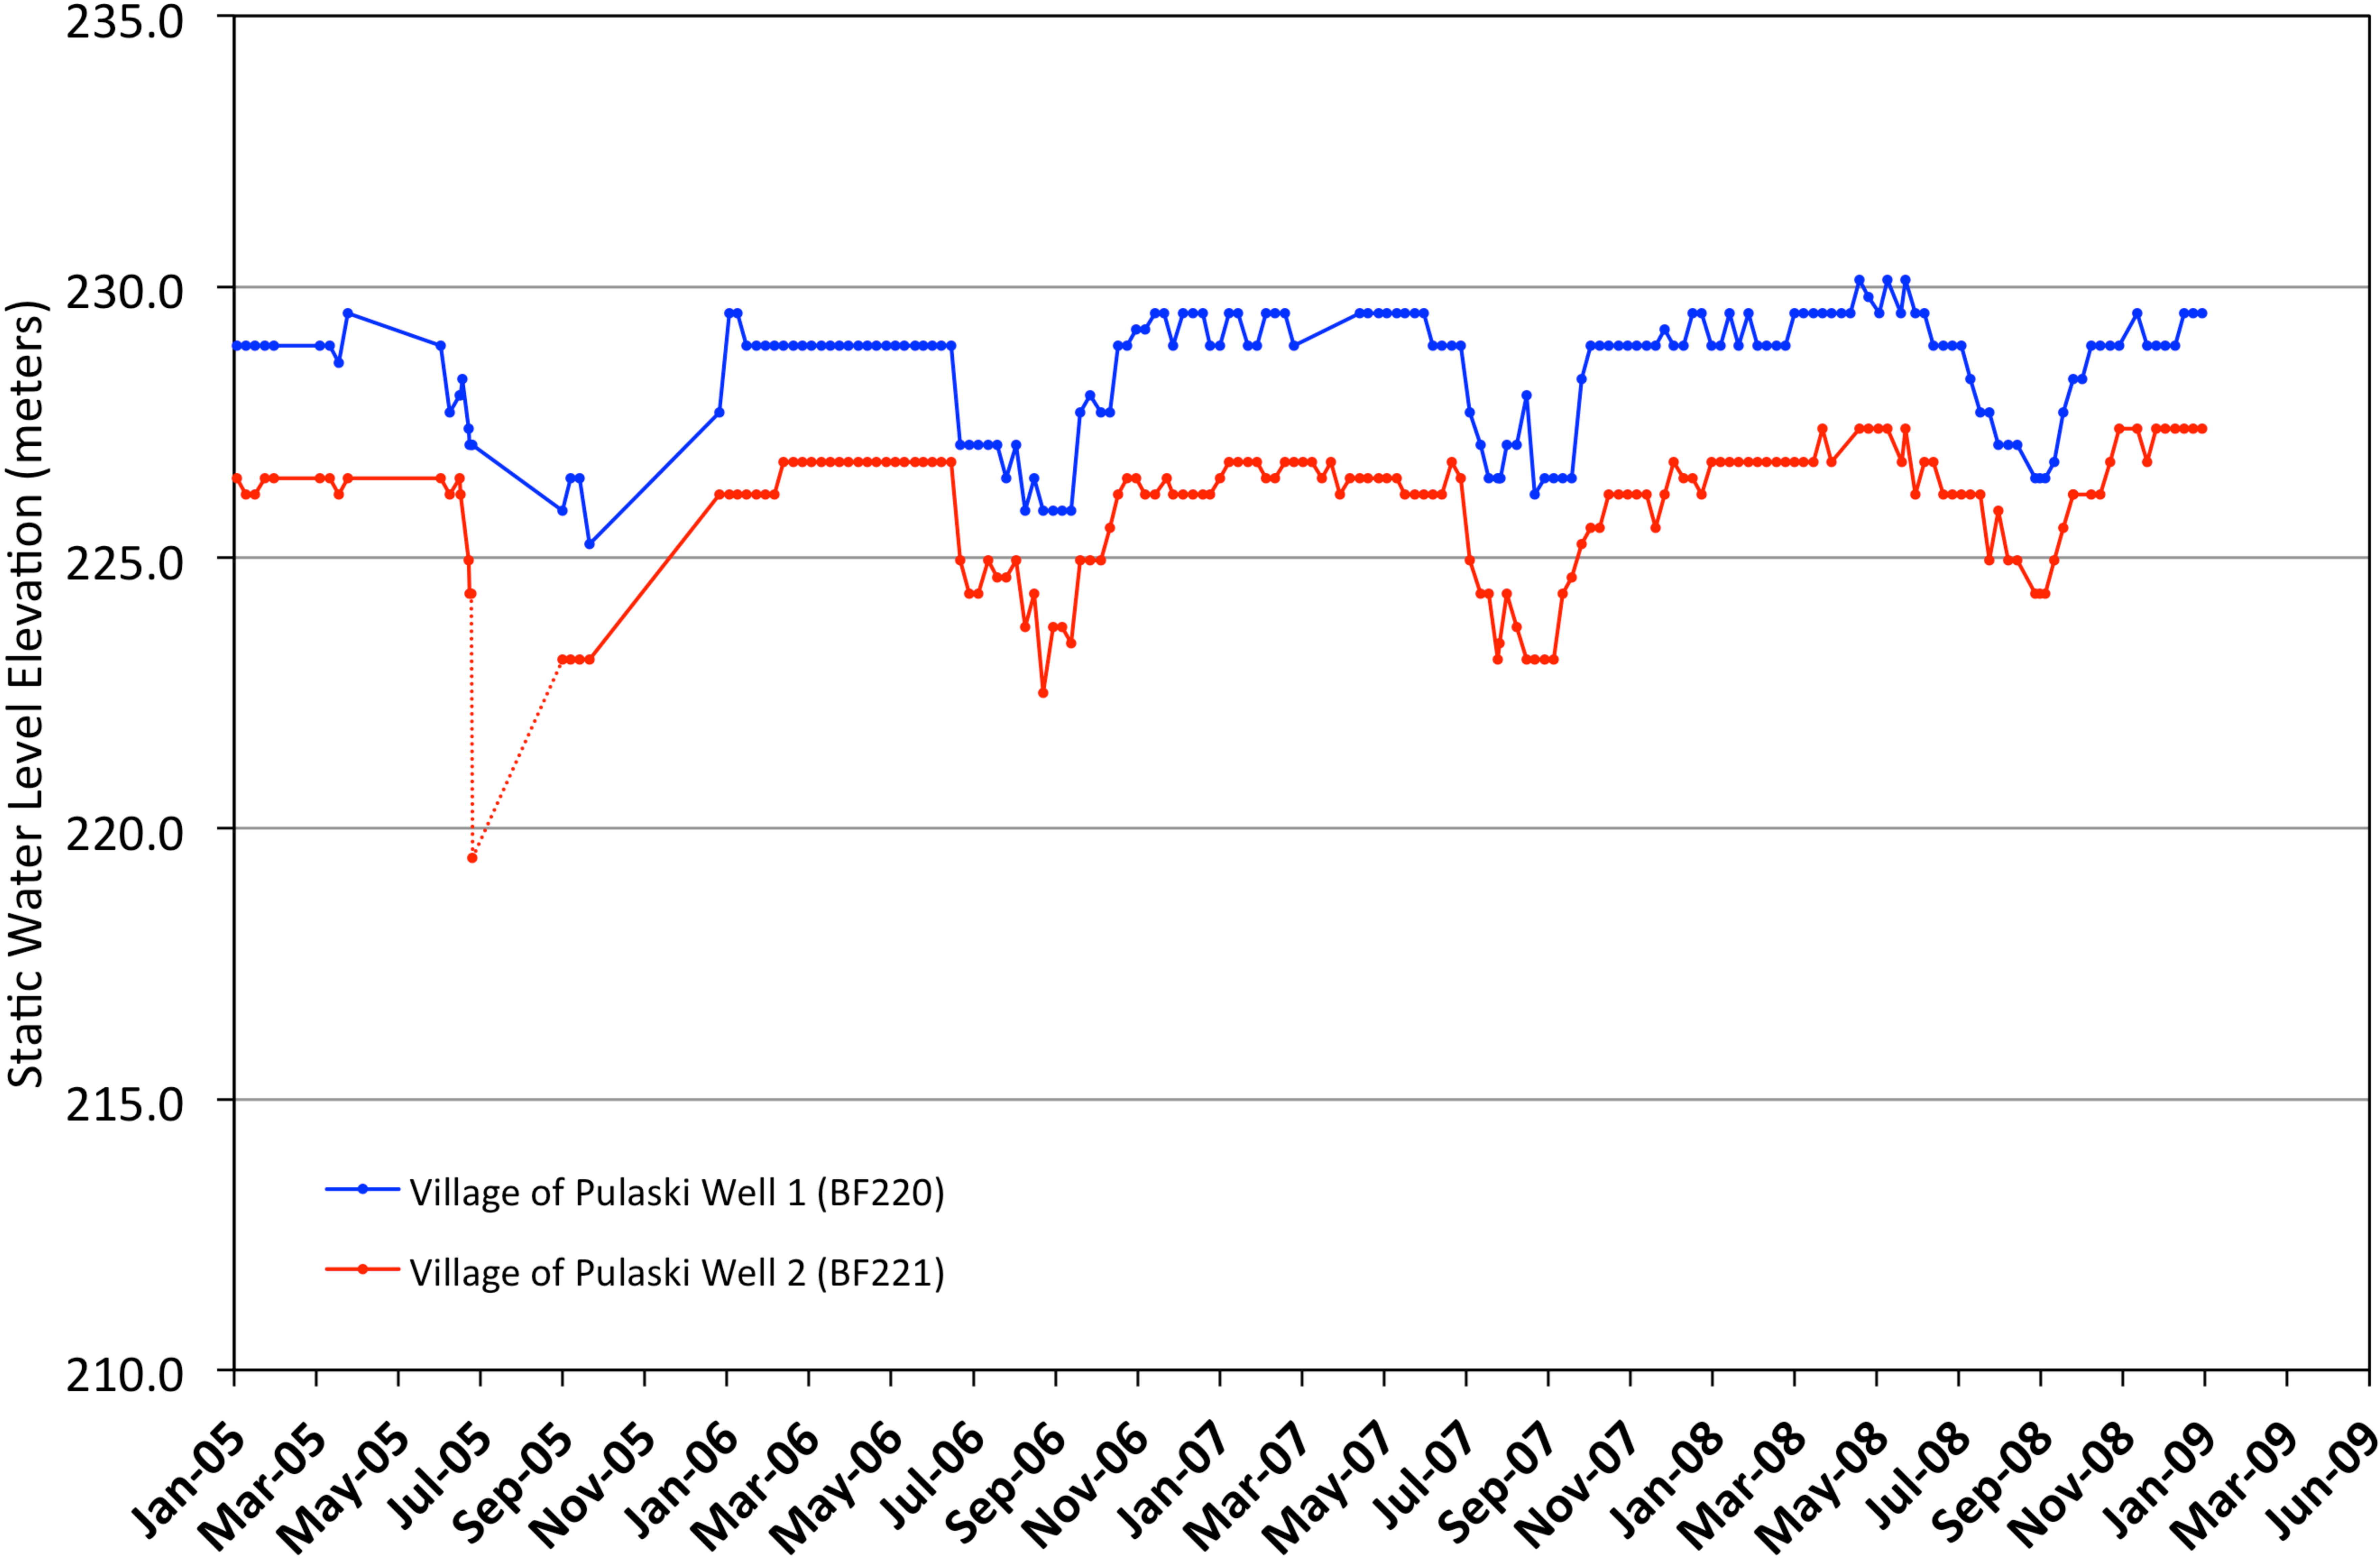

Supplement: s1 [file s1]
