# Supplementary material
Source: MDPI journal article supplement (https://www.mdpi.com/2076-3263/7/1/11)
Supplement: s1 [file s1]

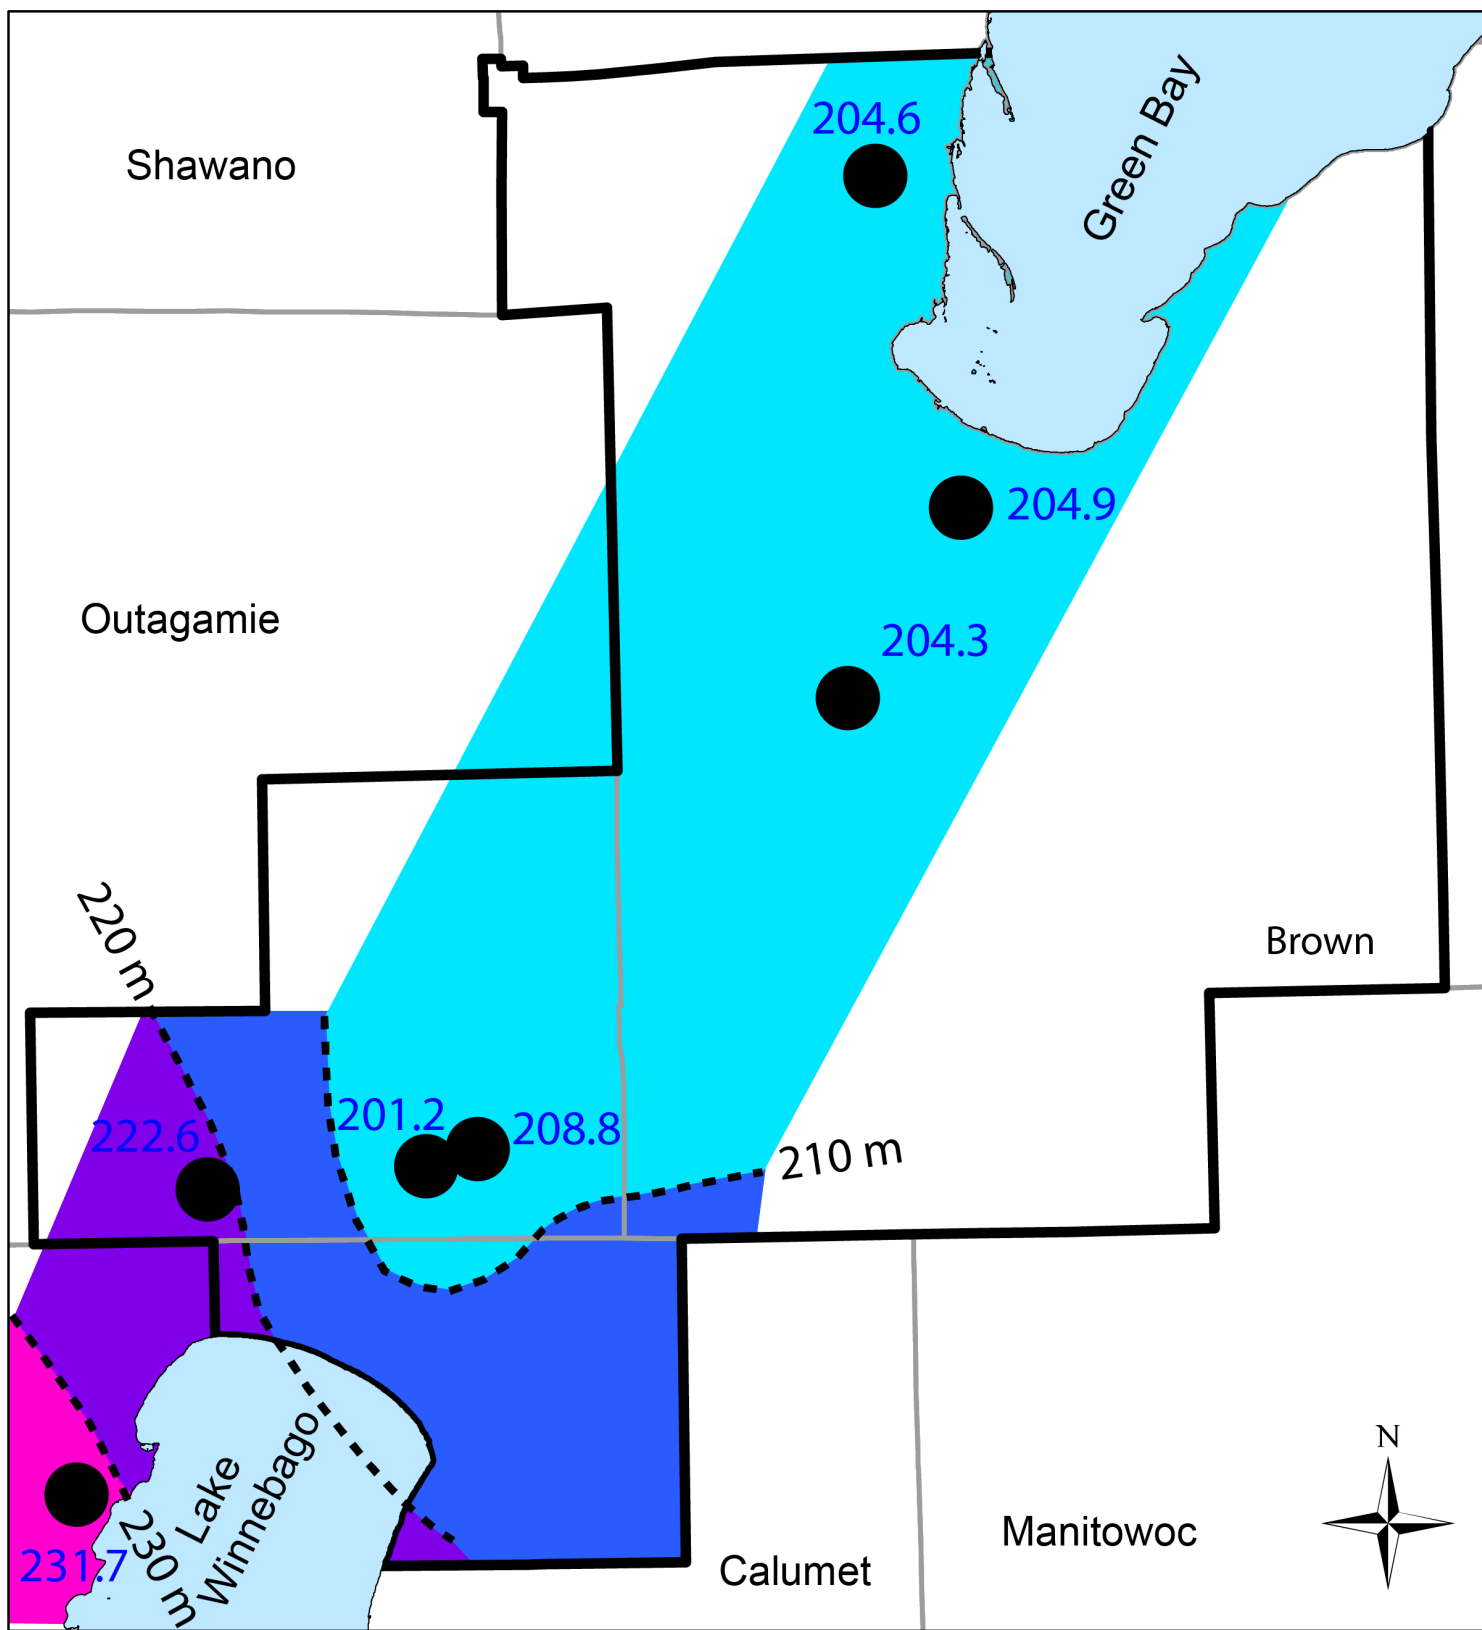

# Predevelopment Conditions ~1880-1900

Contour Interval = 10 m

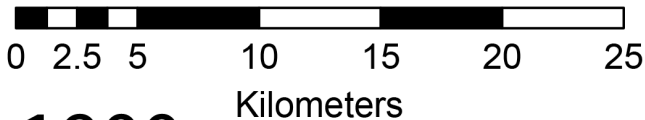

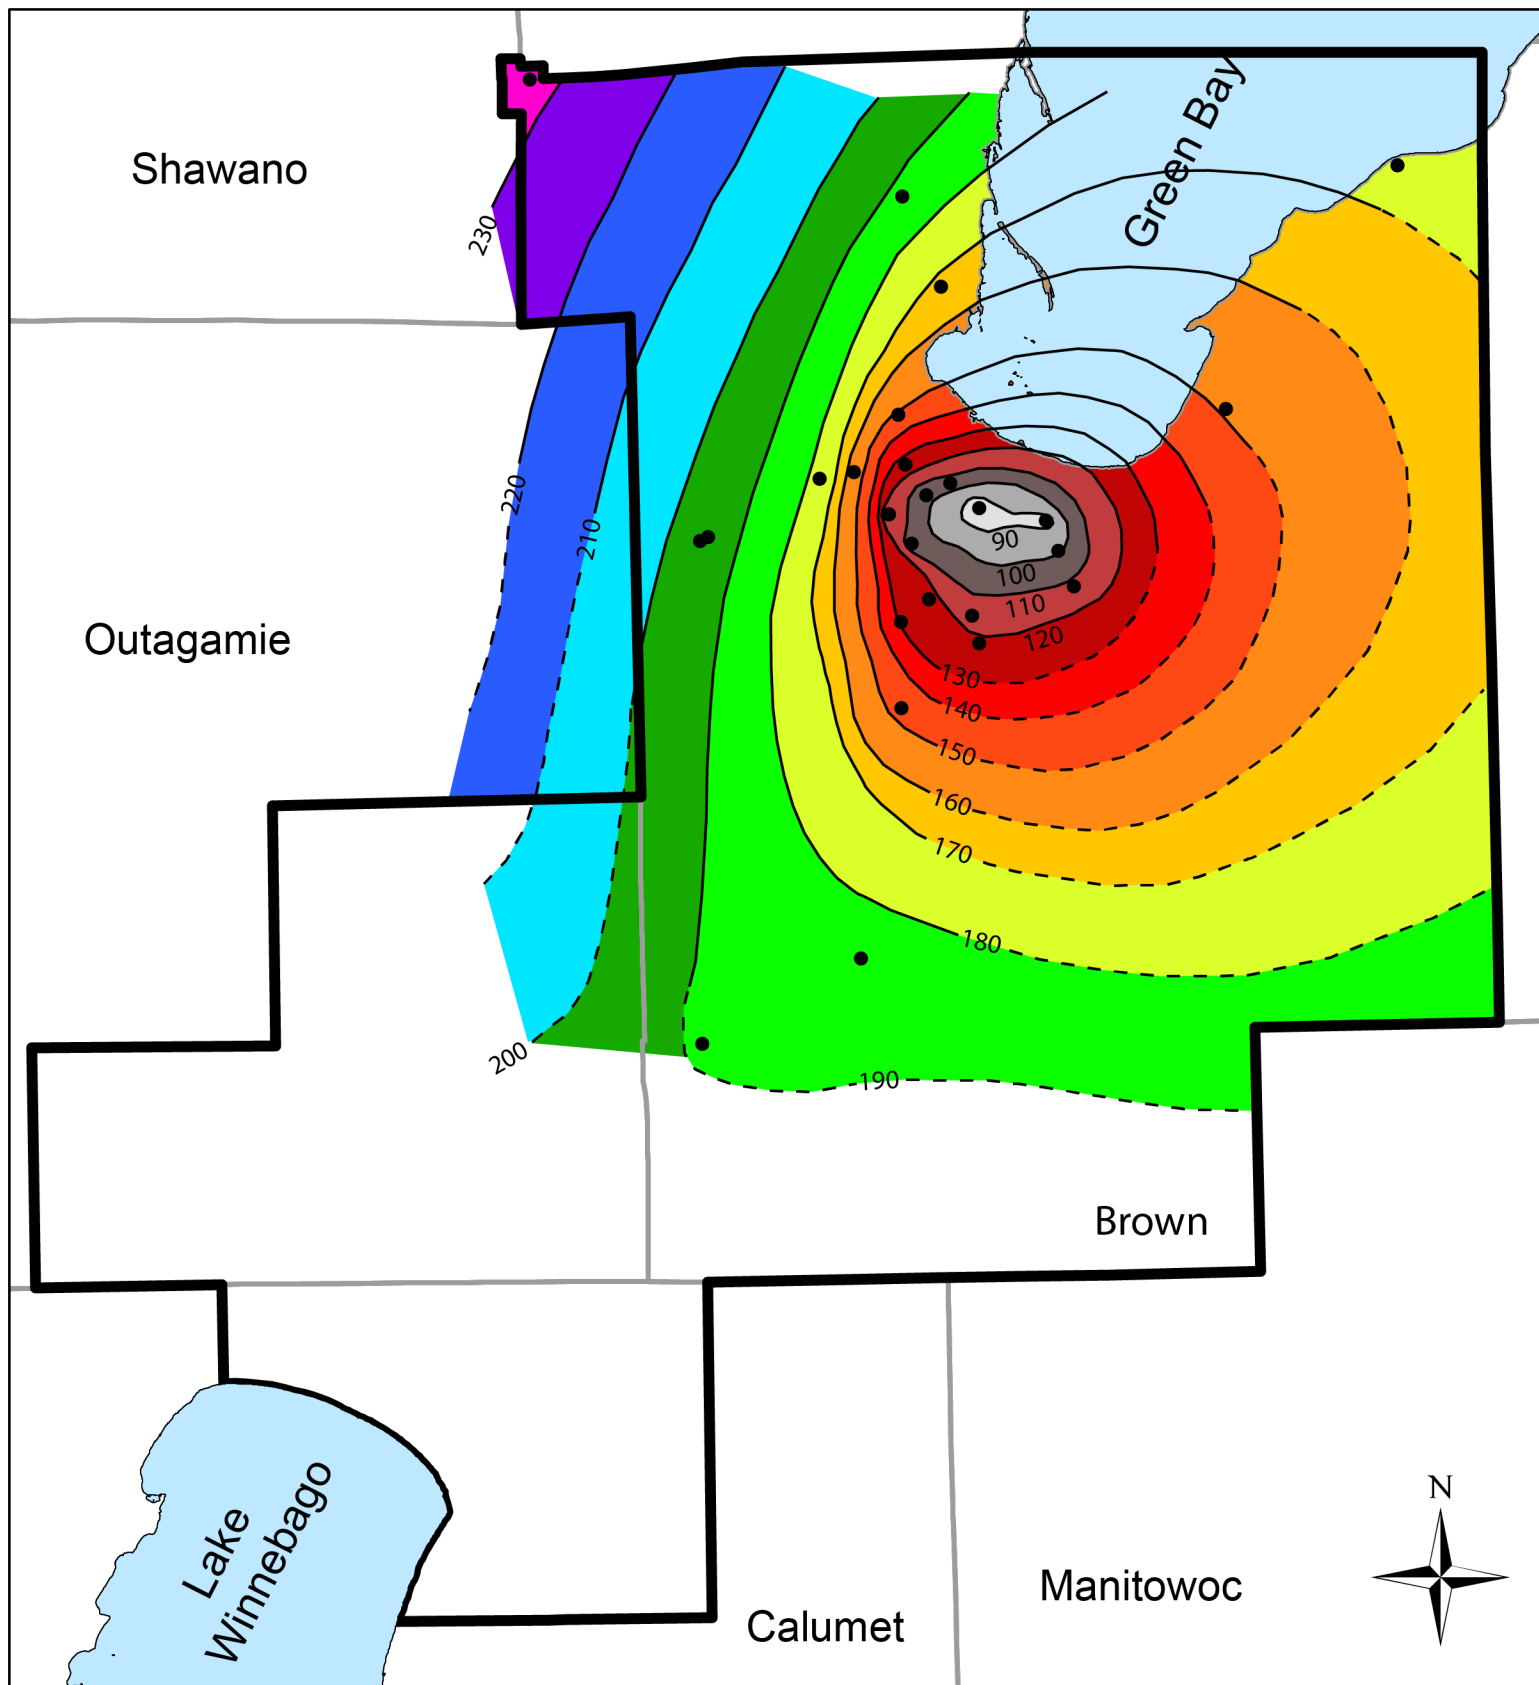

1949

Contour Interval = 10 m

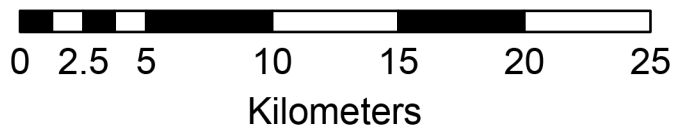

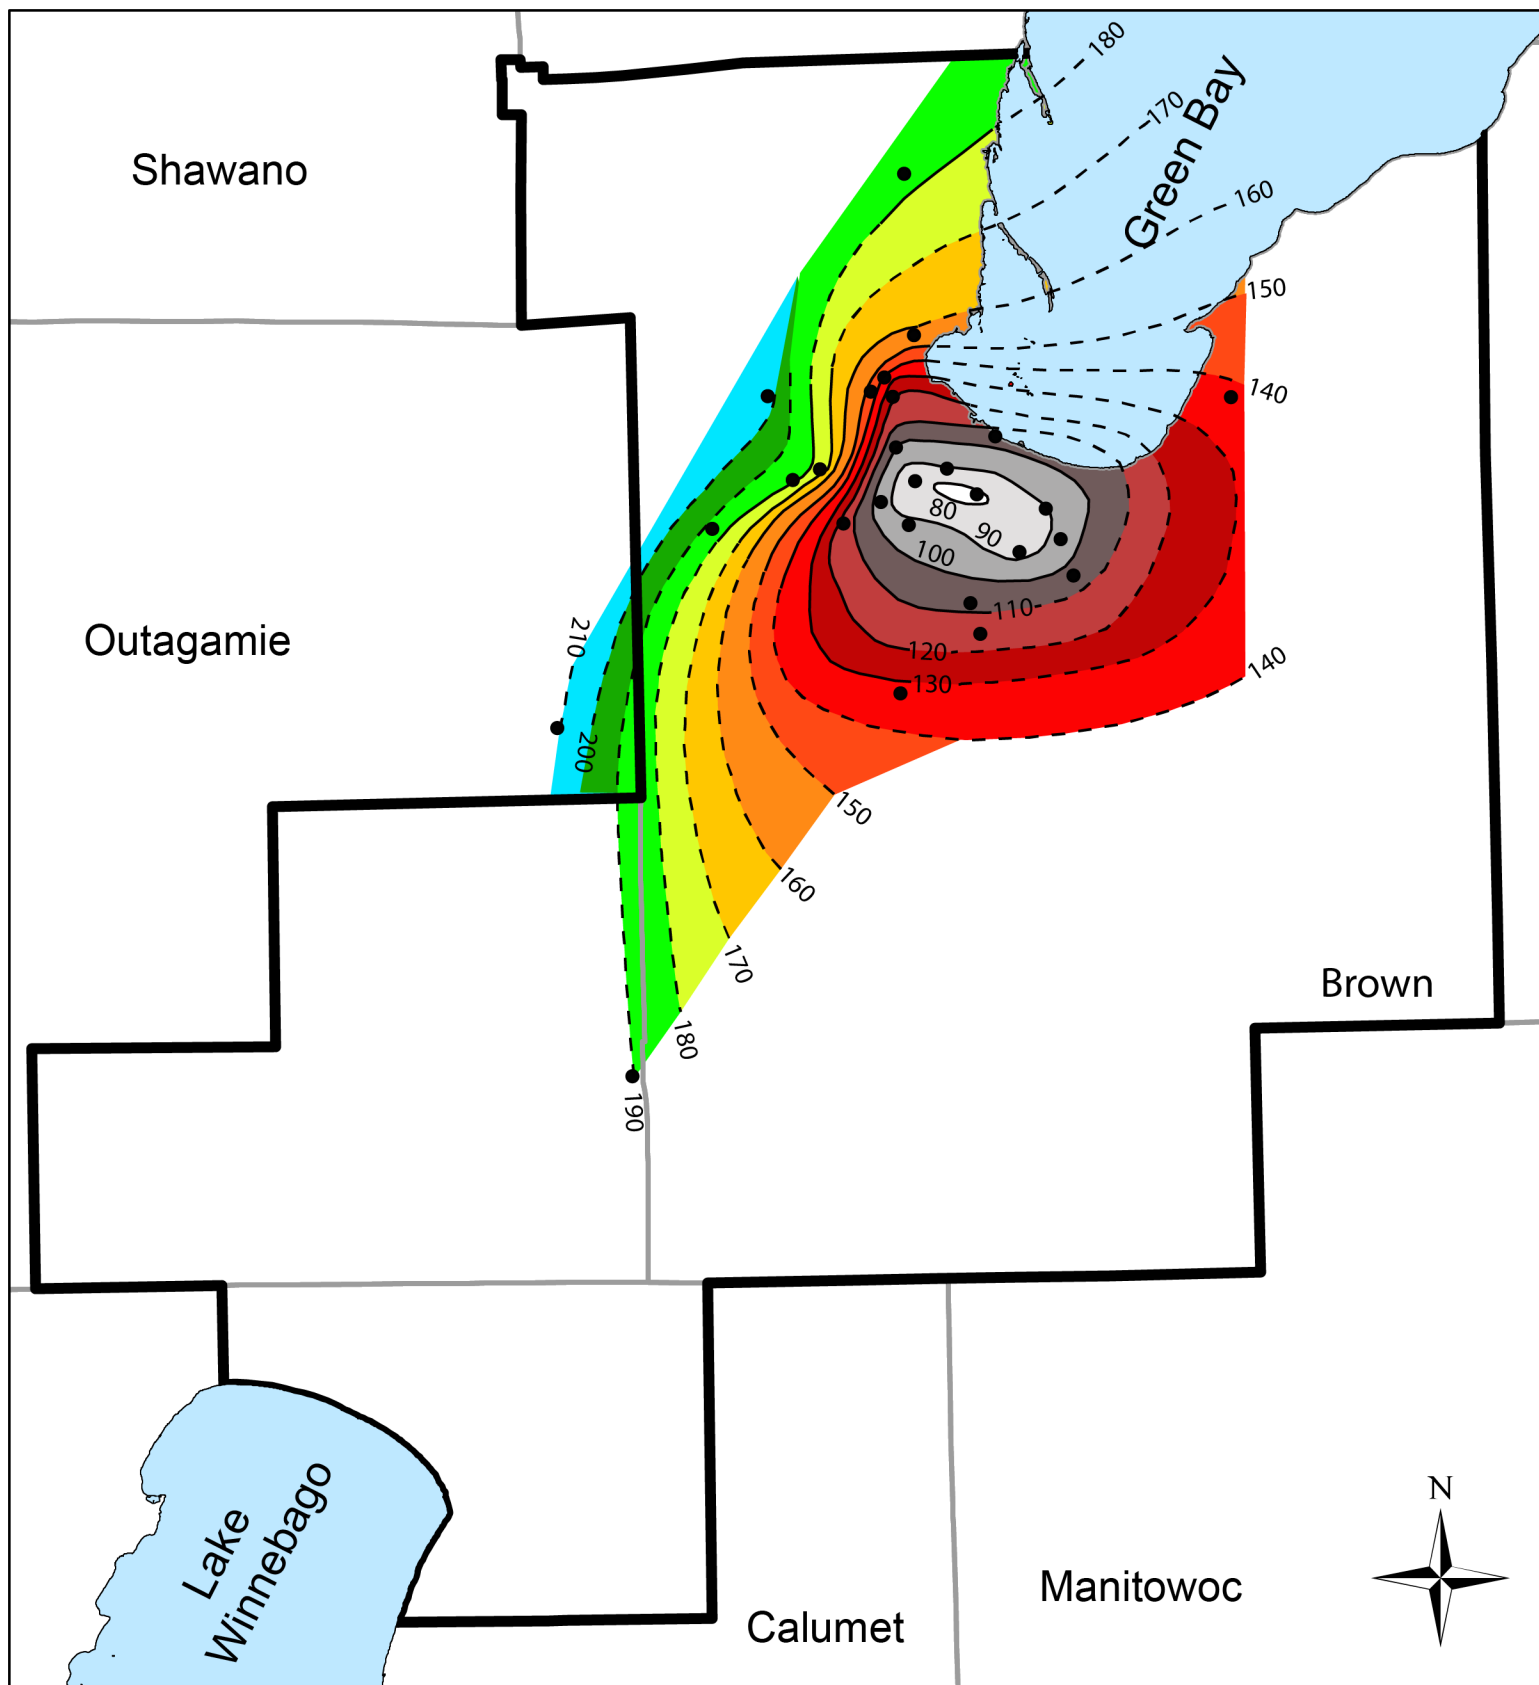

1957

Contour Interval = 10 m

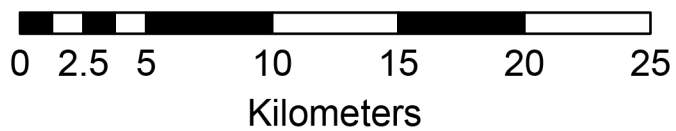

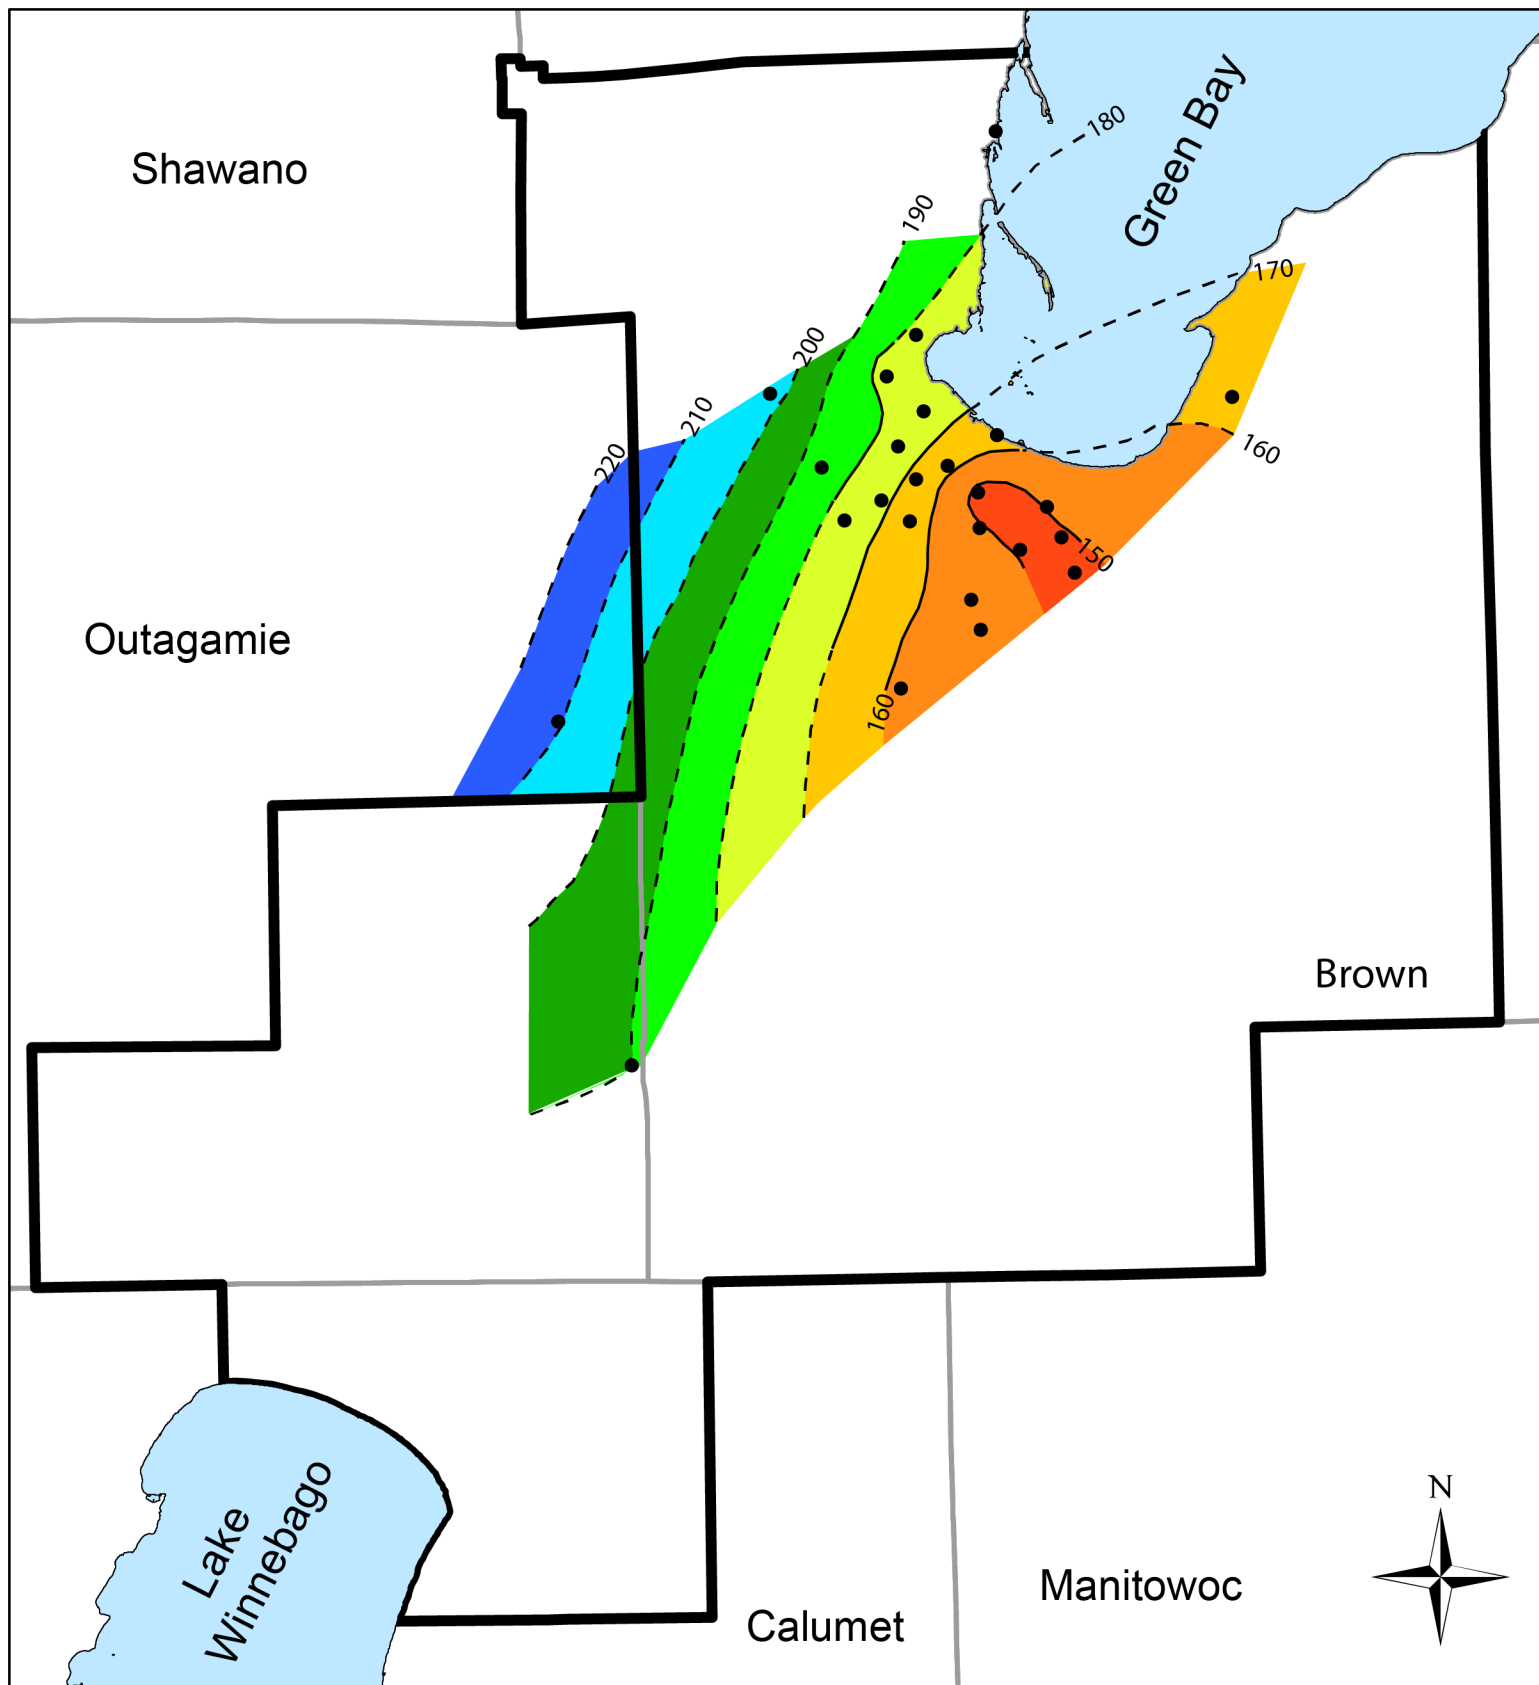

1960

Contour Interval = 10 m

0 2.5 5 10 15 20 25  
Kilometers

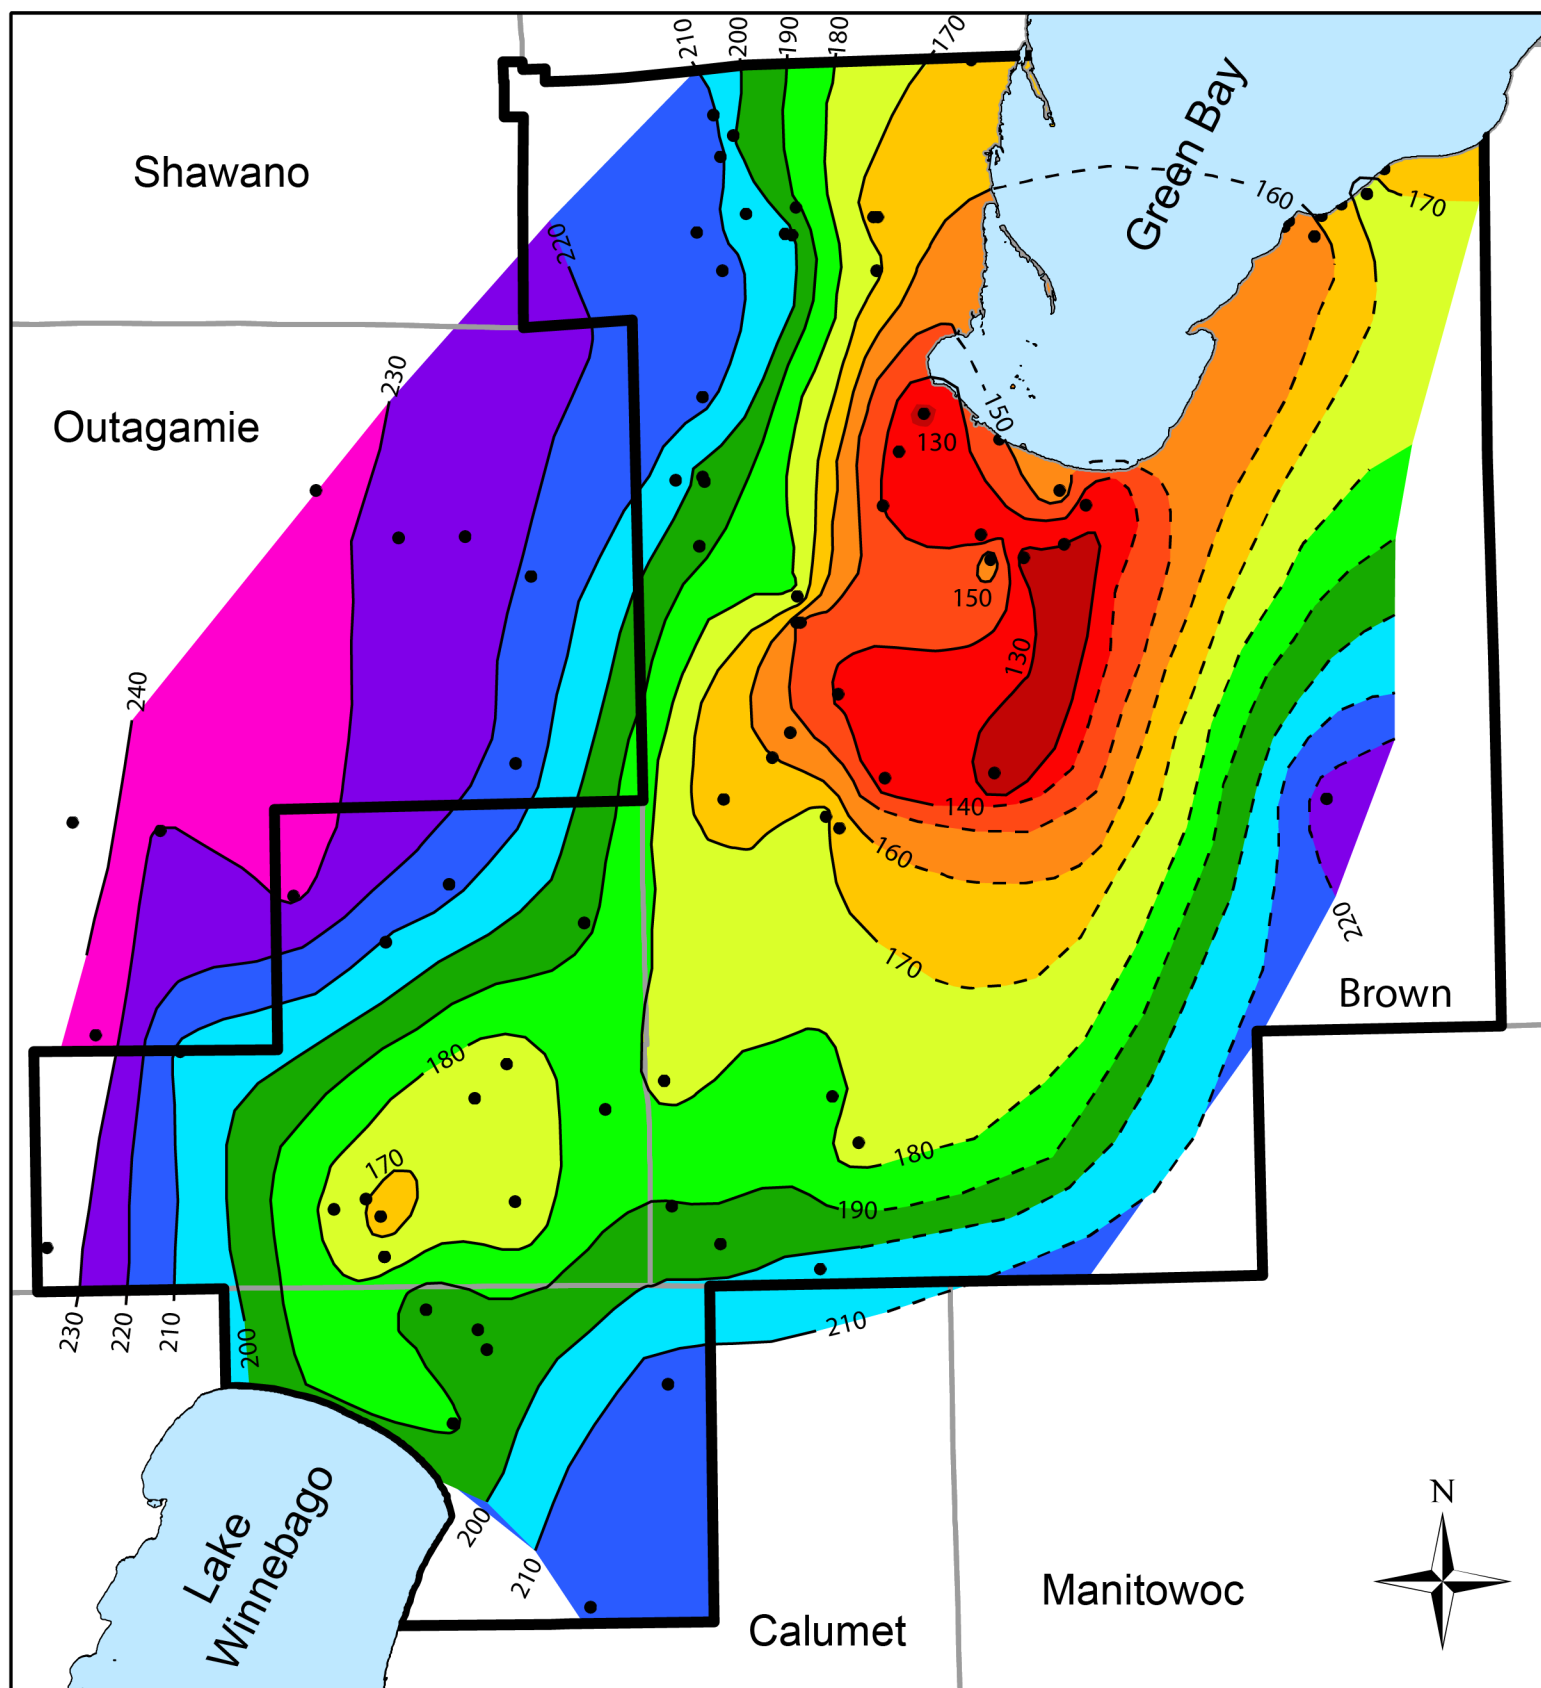

1990

Contour Interval = 10 m

0 2.5 5 10 15 20 25  
Kilometers

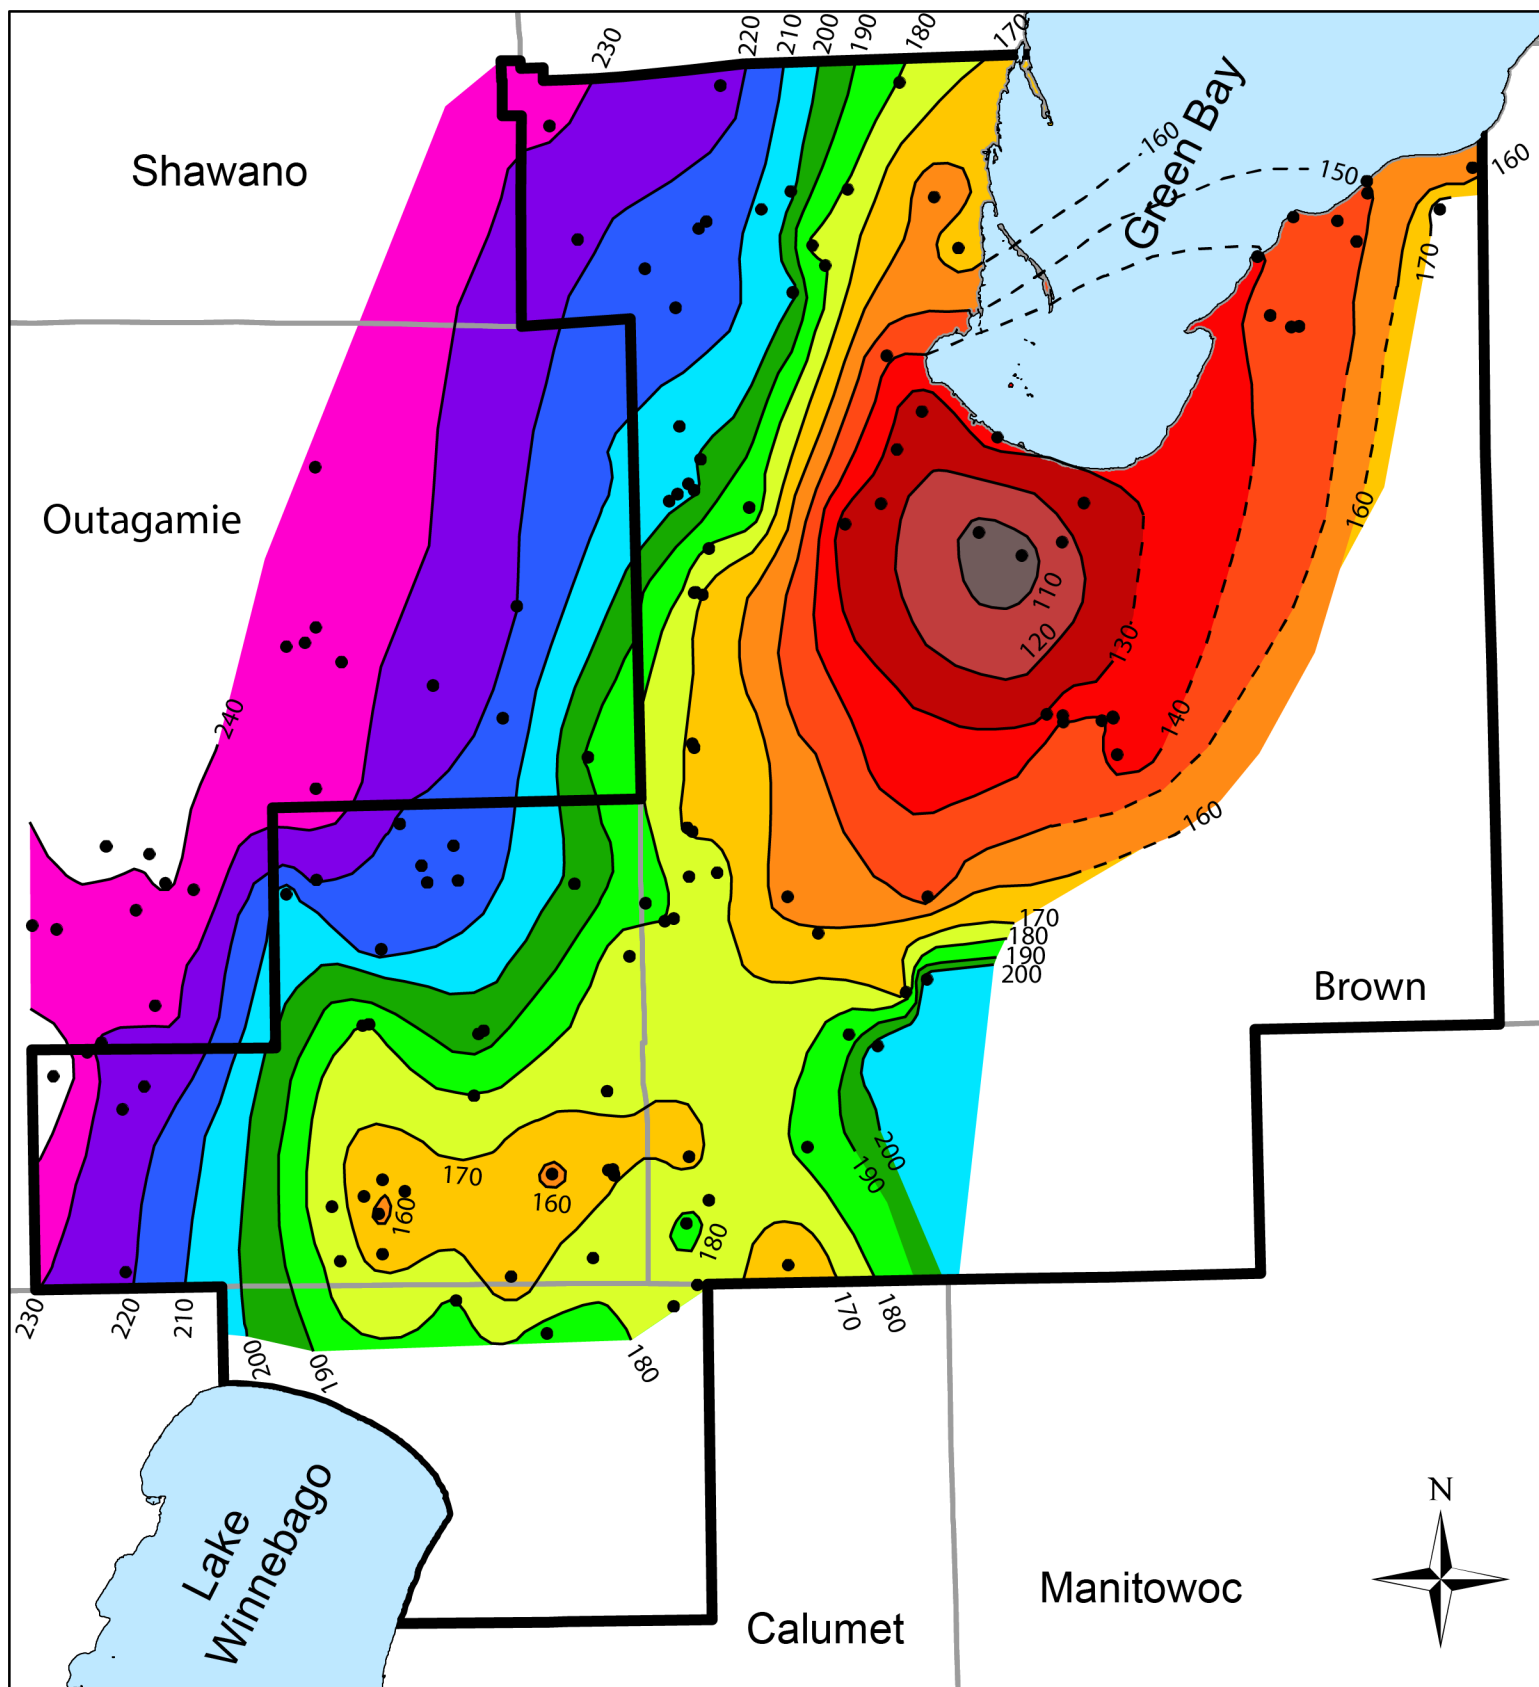

2000

Countour Interval = 10 m

0 2.5 5 10 15 20 25  
Kilometers

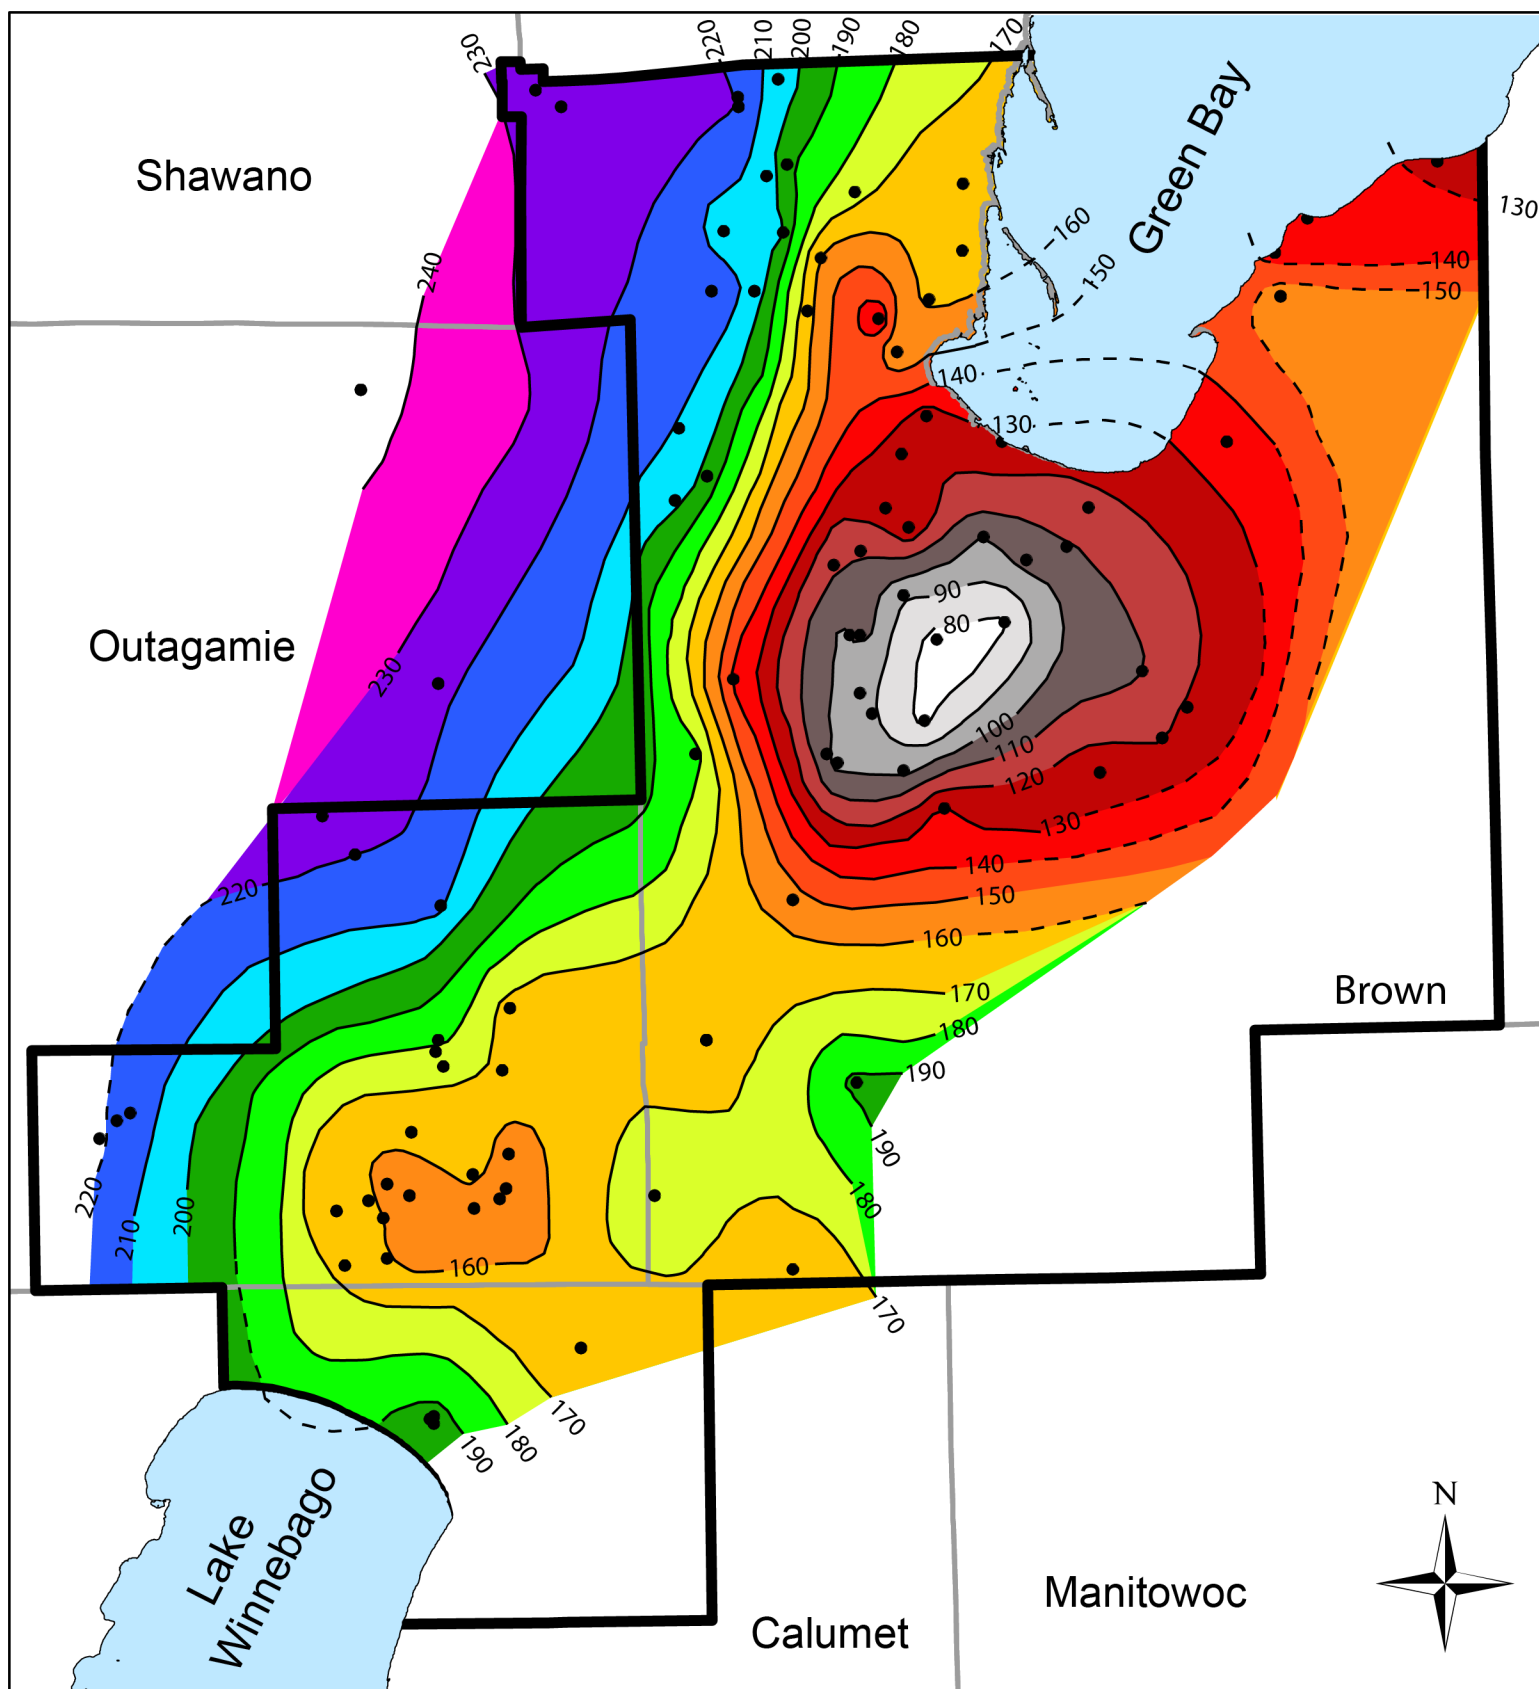

2004-2005

Contour Interval = 10 m

0 2.5 5 10 15 20 25  
Kilometers

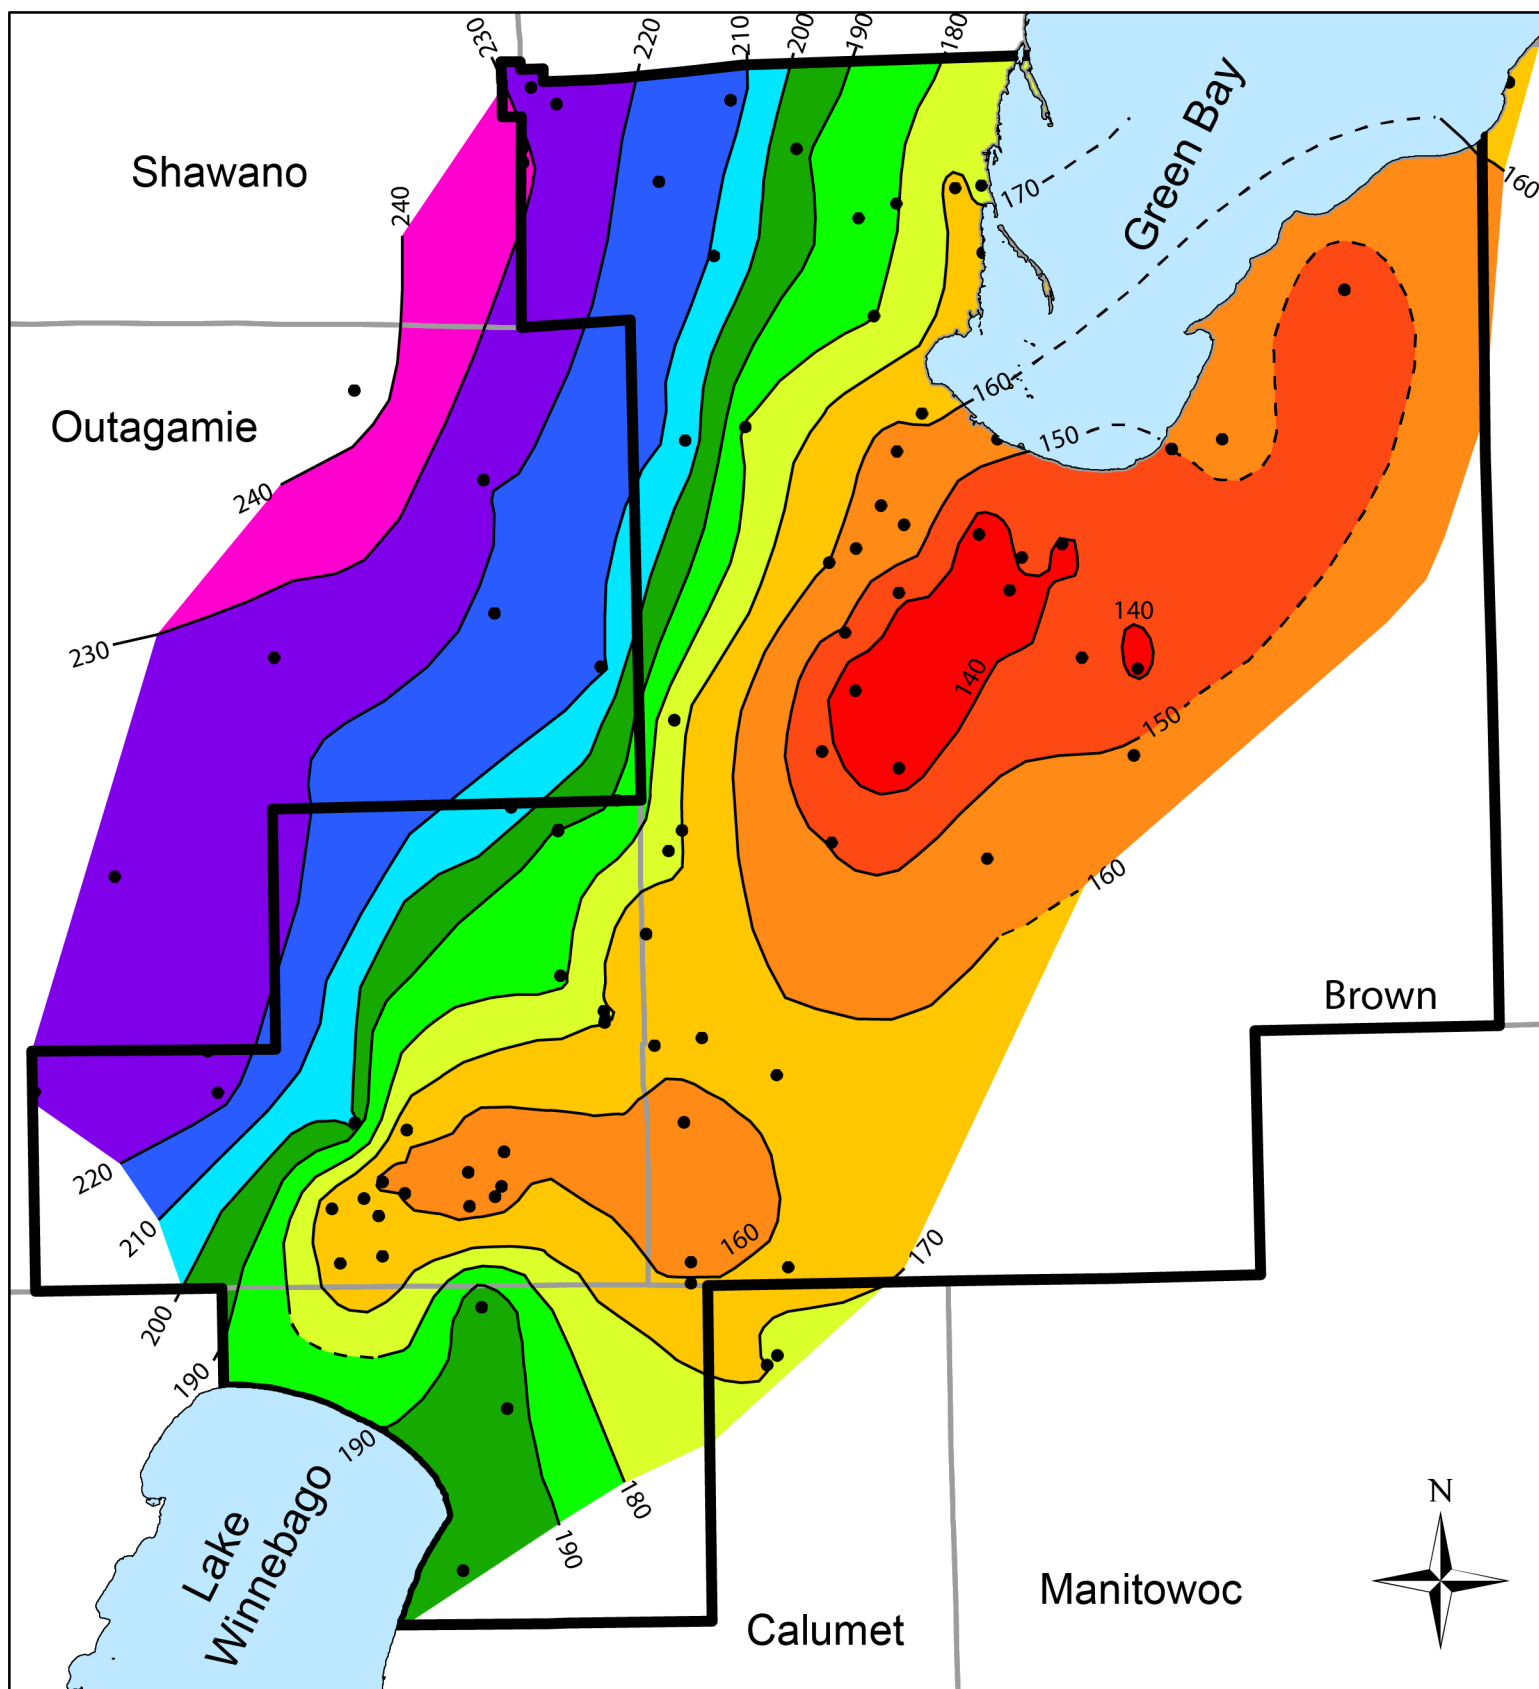

2008

Contour Interval = 10 m



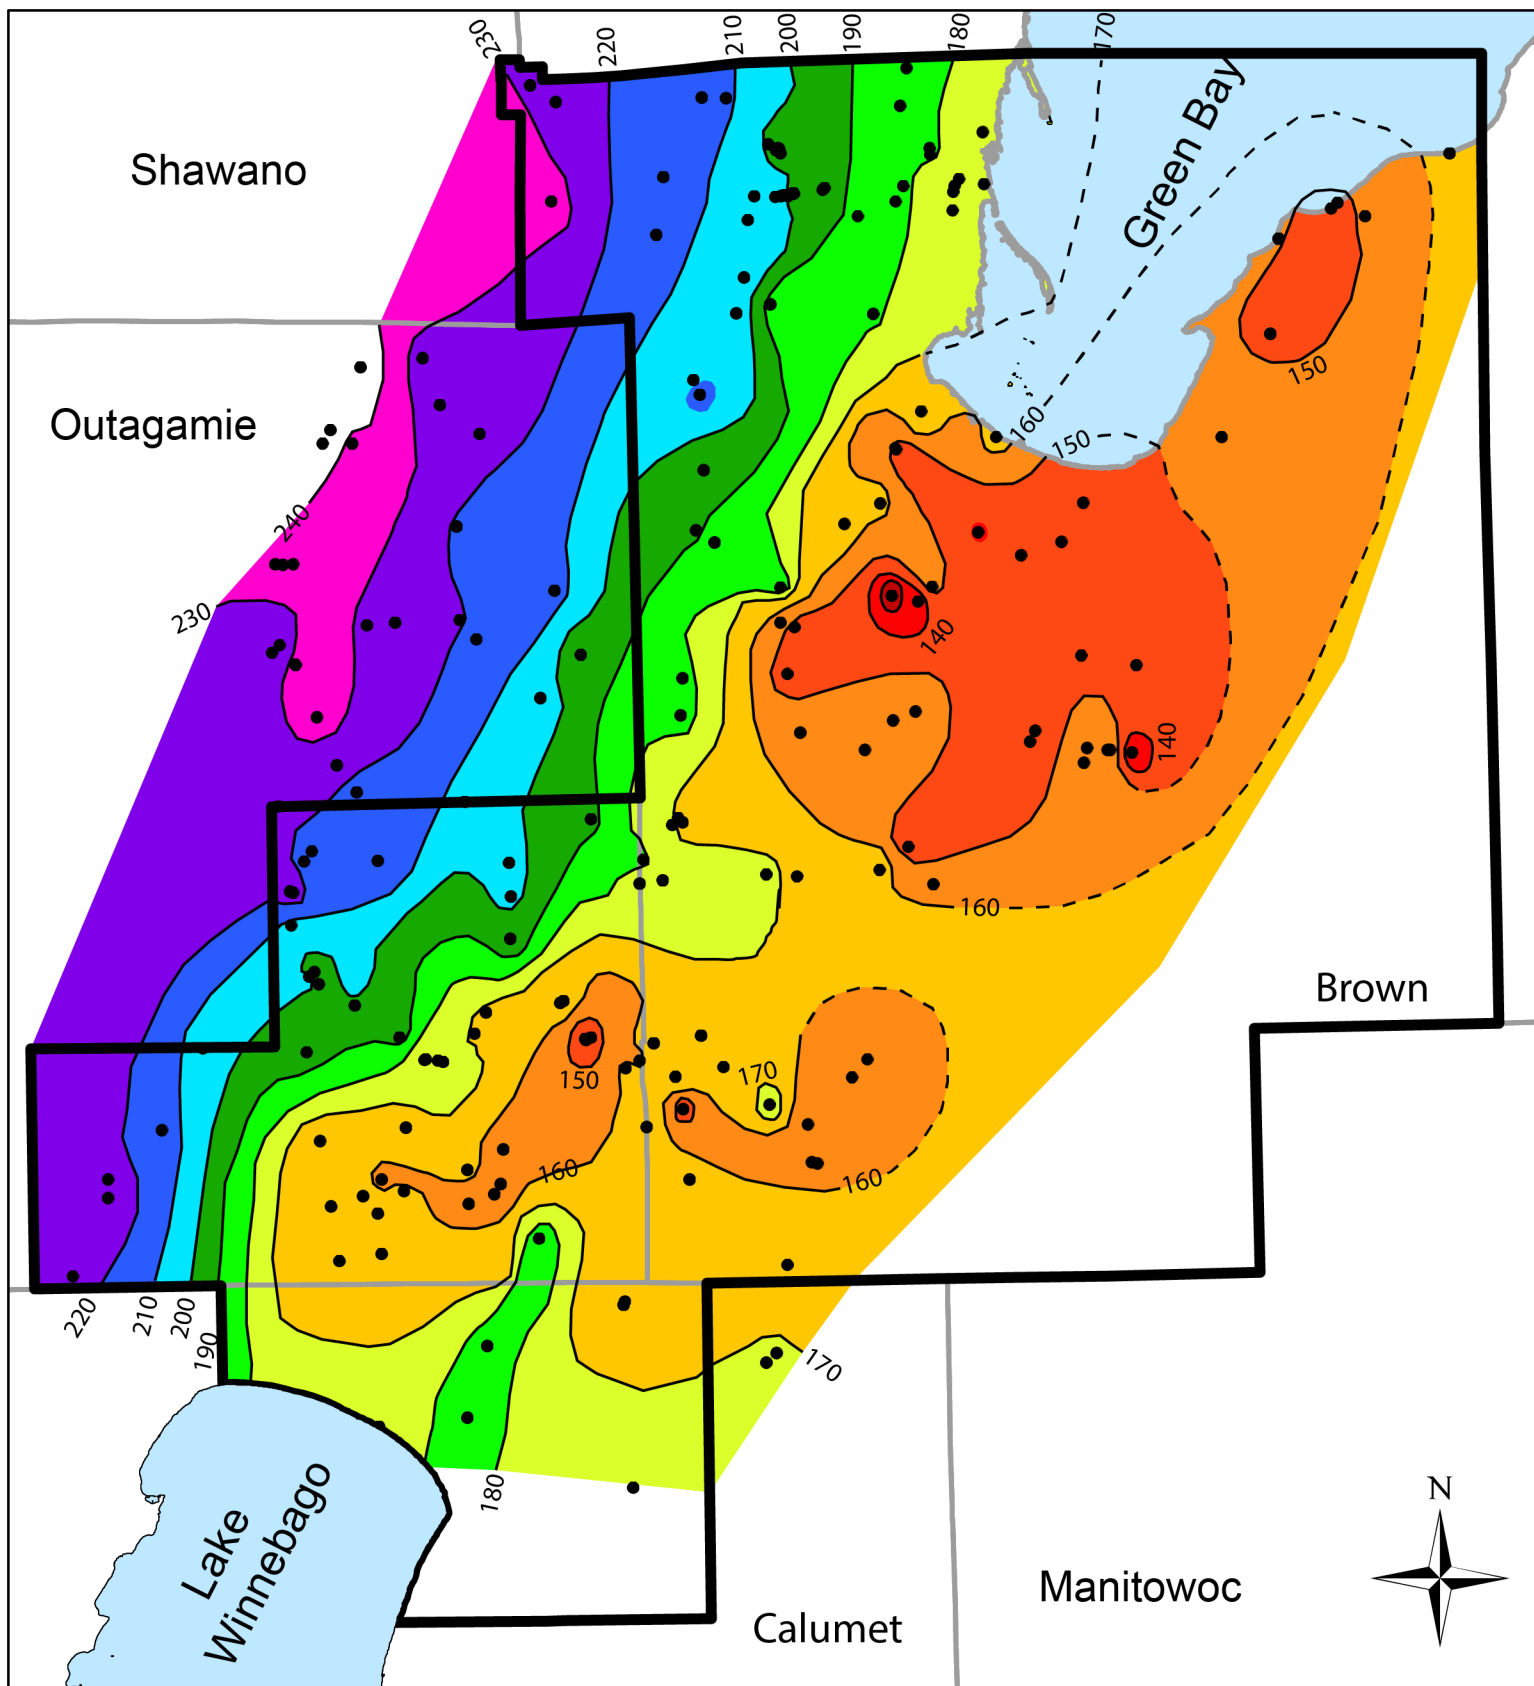

2009-2010

Contour Interval = 10 m

0 2.5 5 10 15 20 25  
Kilometers

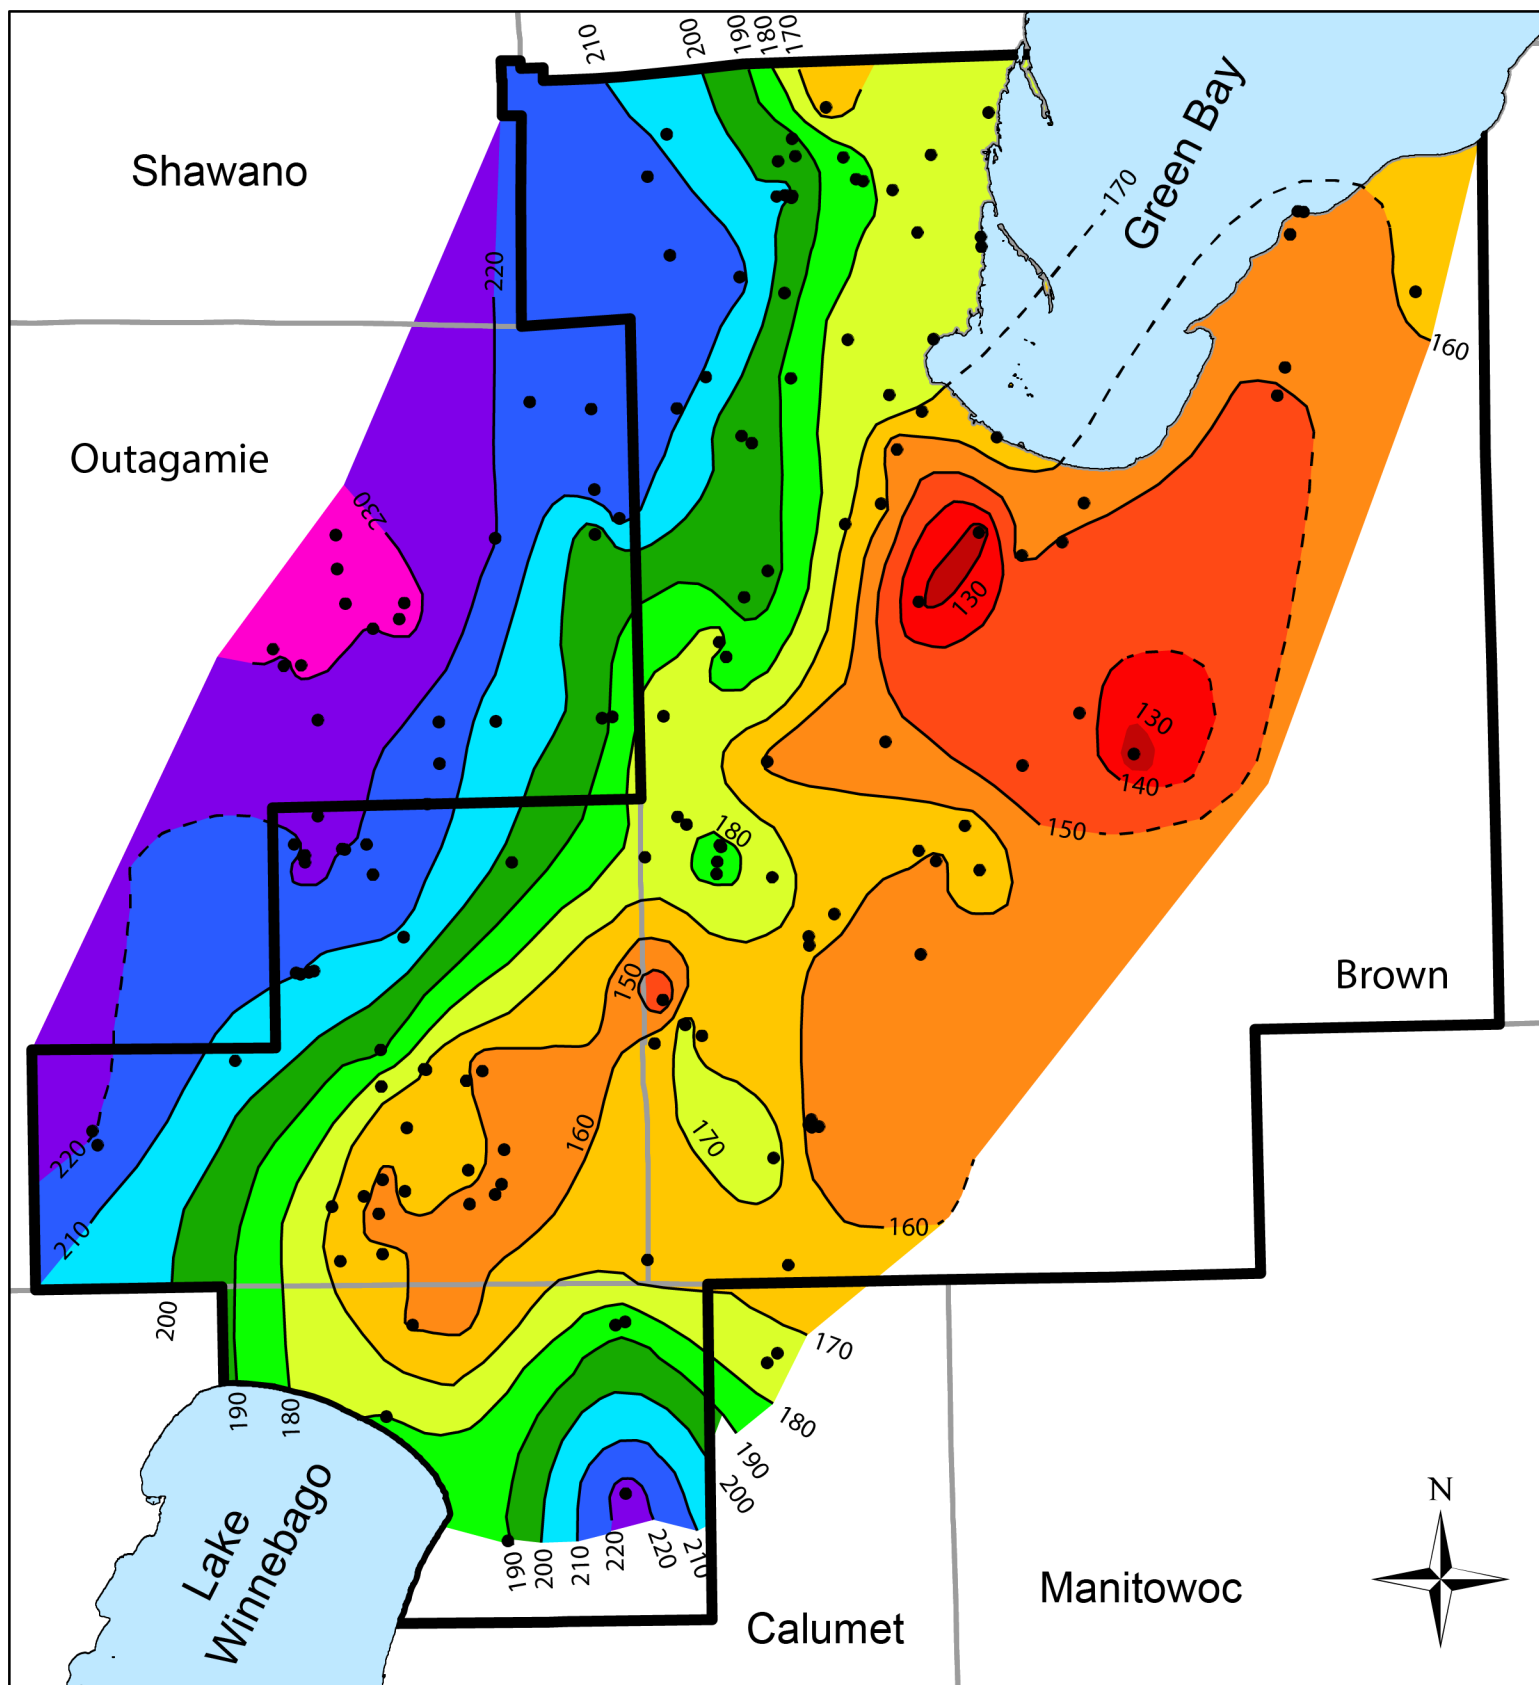

2011-2012

Contour Interval = 10 m

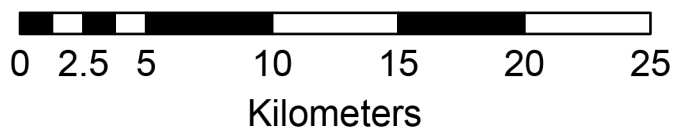

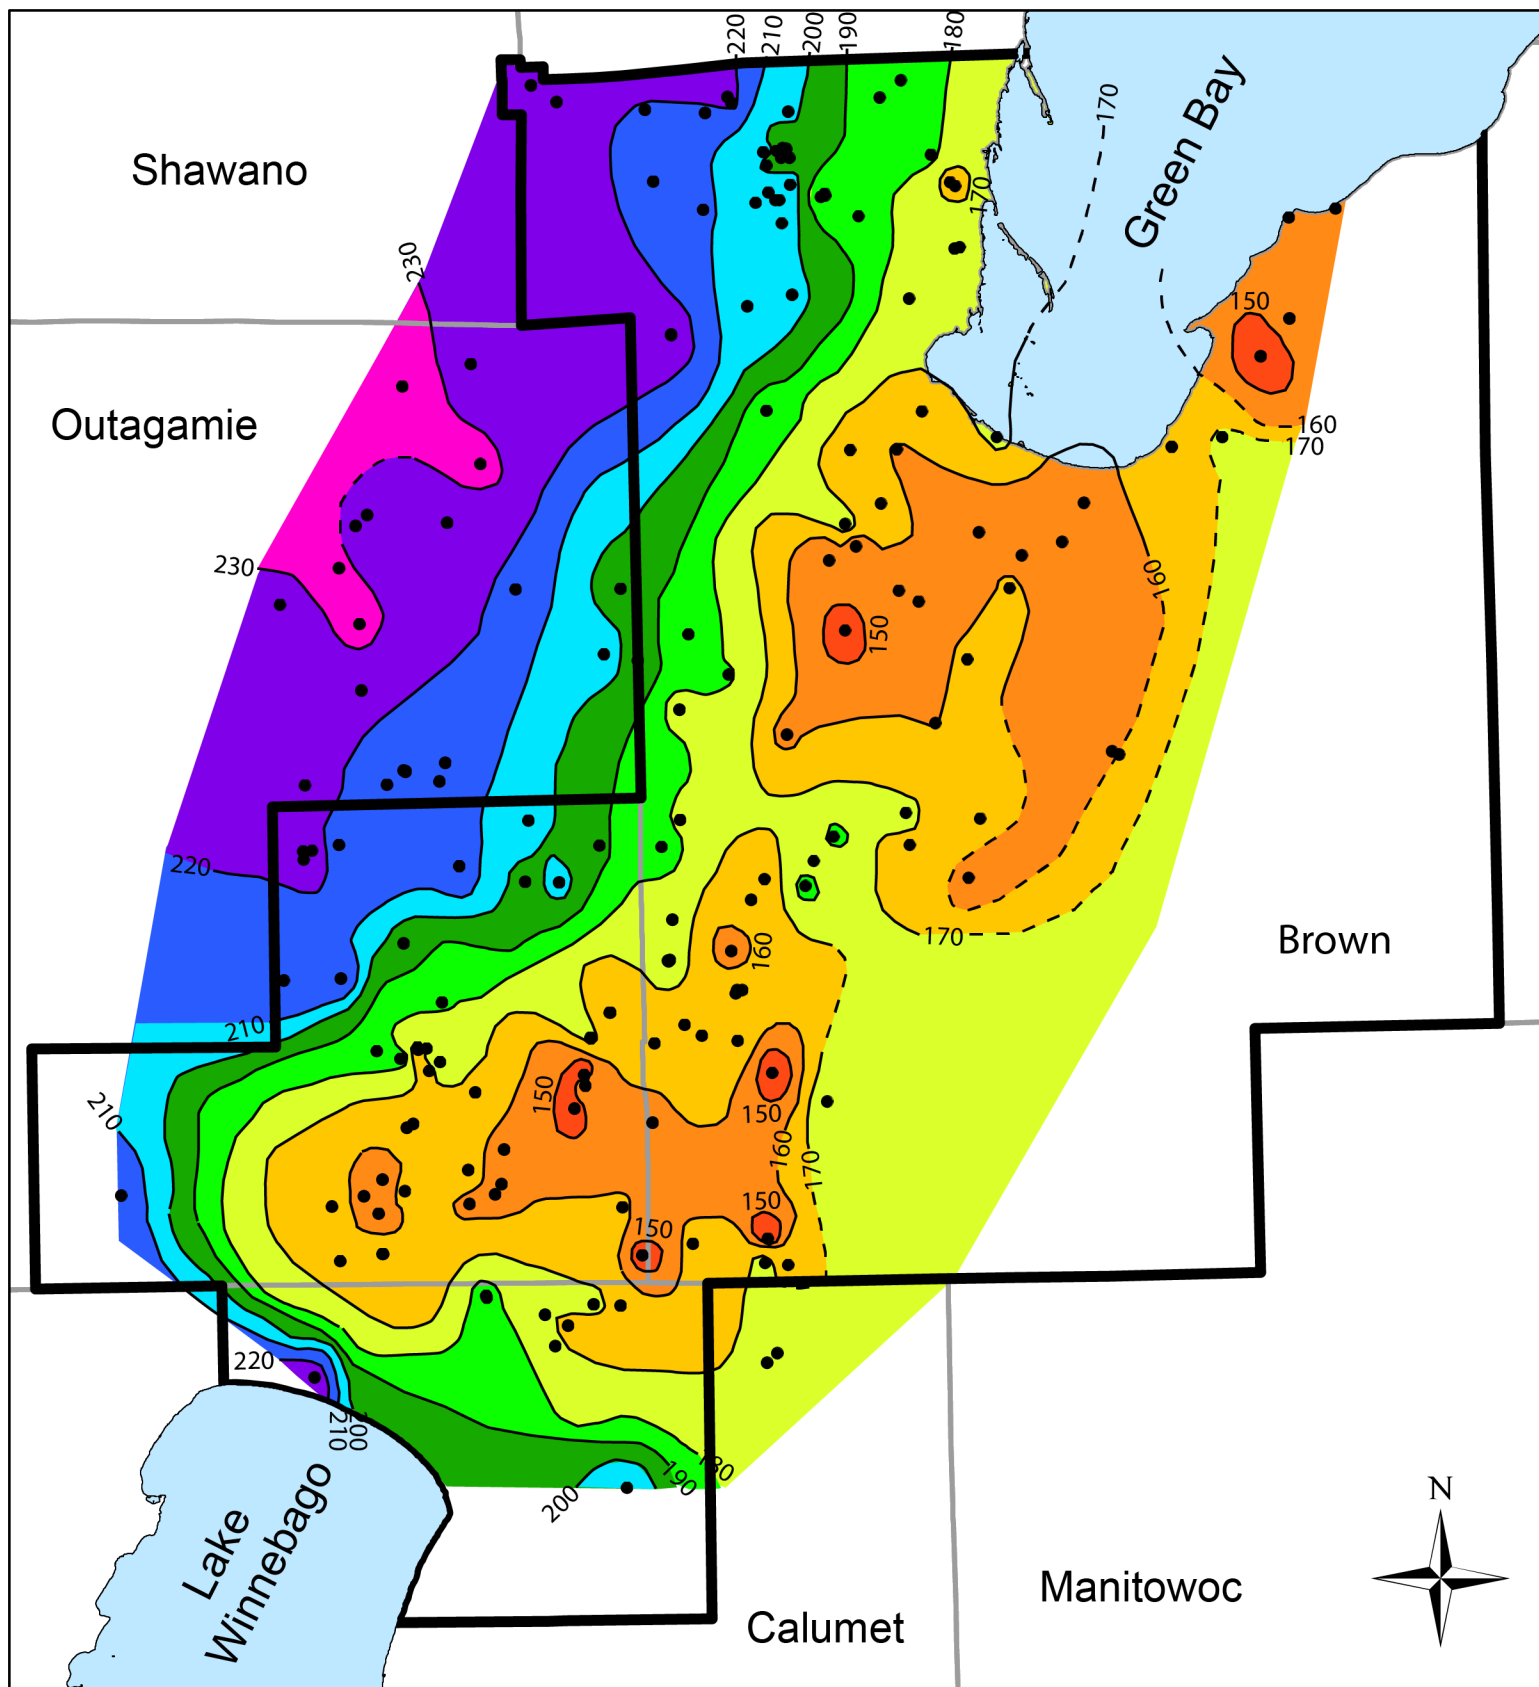

2014-2015

Contour Interval = 10 m
