# Supplementary material
Source: MDPI journal article supplement (https://www.mdpi.com/2076-3263/7/1/11)
Supplement: s1 [file s1]

**Table S3.** Wells in the central Brown County portion of the Northeast GMA that reported static water level elevations below the top of the confined aquifer at some point between 2005 and 2016.

| Municipality | Well Number and Identifier <sup>1</sup> | Top of Confined Aquifer <sup>2</sup> | Lowest Potentiometric Surface Elevation (m) |
|--------------|-----------------------------------------|--------------------------------------|---------------------------------------------|
| De Pere      | Well #3; BF185                          | 132.0 m                              | 90.5 m                                      |
| De Pere      | Well #5; BF187                          | 111.9 m                              | 97.8 m                                      |
| De Pere      | Well #6; BF188                          | 136.5 m                              | 102.4 m                                     |
| Ashwaubenon  | Well #4; BF208                          | 137.1 m                              | 97.5 m                                      |
| Ashwaubenon  | NRRM-1; BN-0435                         | 130.5 m                              | << 129.5 m                                  |

<sup>1</sup> Values are either Wisconsin Unique Well Number or WGNHS unique well identifier. <sup>2</sup>Elevation of the top of the confined Cambrian-Ordovician sandstone aquifer in meters above sea level.

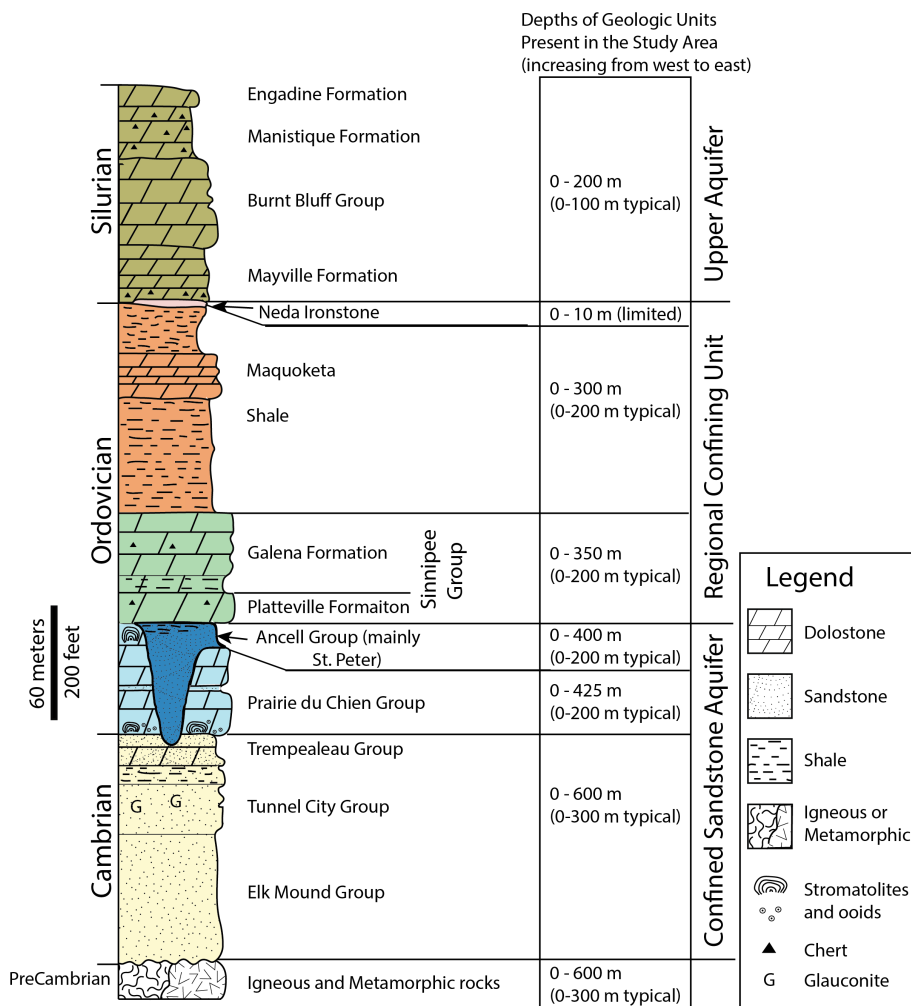

**Figure S3.** Simplified stratigraphic column for Paleozoic bedrock in northeastern Wisconsin, USA (modified from [18]). Pleistocene sediments are not shown here for simplicity, but range in thickness from 0 to 100 m in the Northeast GMA.
